# Supplementary material for: Elucidating the Multitrait Association between Parkinson’s Disease and Respiratory Disorders: HLA gene complex as a causal nexus
Source: Research Square preprint supplement (doi:10.21203/rs.3.rs-7234326/v1), 2025-08-04

## **Supplementary Information**

# **Elucidating the Multitrait Association between Parkinson's Disease and Respiratory Disorders: HLA gene complex as a causal nexus**

Xinhao Wang MD, Ph.D 1,2†, Jintao Li MD 1†, Zihao Wang 3†, Zifeng Huang MD, Ph.D 1, Xiaobo Wei MD, Ph.D 1, Hang Zhou MD, Ph.D 1, Hailing Liu MD, Ph.D 2, Bihan Chi MD 1, Chunguang Li MD, Ph.D 1, Xiaoying Cui MD, PhD 4, Chao Deng Ph.D 5, Yinghua Yu MD, Ph.D 5\*, Qing Wang MD, Ph.D 1\*

1. Department of Neurology, Zhujiang Hospital of Southern Medical University, Guangzhou, Guangdong 510282, P.R. China

2. Department of Neurology, Maoming People's Hospital, 101 Weimin Road, Maonan District, Maoming, Guangdong, China

3. Ipswich Grammar School, Darling Street, Ipswich Q 4305, Queensland, Australia

4. Queensland Centre for Mental Health Research, Wacol, Queensland Brain Institute, University of Queensland, St. Lucia, QLD, 4072, Australia

5. School of Medical, Indigenous and Health Sciences, University of Wollongong, Wollongong, Australia

## Supplementary Figures

**Figure S1.**Leave-one-out sensitivity tests between Parkinson's disease and A)idiopathic pulmonary fibrosis and B)obstructive sleep apnea

**Figure S2.**Manhattan plots of PLACO results for Parkinson's disease and A)chronic obstructive pulmonary disease, B) idiopathic pulmonary fibrosis, C)obstructive sleep apnea and D)asthma

**Figure S3.**Quantile-Quantile (Q-Q) Plots of PLACO Results for Parkinson's disease and A)chronic obstructive pulmonary disease , B) idiopathic pulmonary fibrosis, C)obstructive sleep apnea and D)asthma

**Figure S4.**LocusZoom and LocusCompare Plots of Colocalized Locus A)SETD1A and B)PIGL

**Figure S5.**Star Bar Plot of colocalization results between PD and RD trait

**Figure S6.**The transcriptomes form discrete cell-specific clusters using Uniform Manifold Approximation and Projection (UMAP) for peripheral blood mononuclear cell(PBMC) in idiopathic pulmonary fibrosis

**Figure S7.**Expression of MAGMA-prioritized genes across cell-specific clusters from UMAP for A)peripheral blood mononuclear cell(PBMC) in Parkinson's disease, B)brain cell in Parkinson's disease, C)PBMC in chronic obstructive pulmonary disease and D)PBMC in idiopathic pulmonary fibrosis. Red indicates higher expression

This Additional file has been provided by the authors to give readers additional information about their work.

## Supplementary Figures

**Figure S1.** Leave-one-out sensitivity tests between Parkinson's disease and A) idiopathic pulmonary fibrosis and B) obstructive sleep apnea

A)

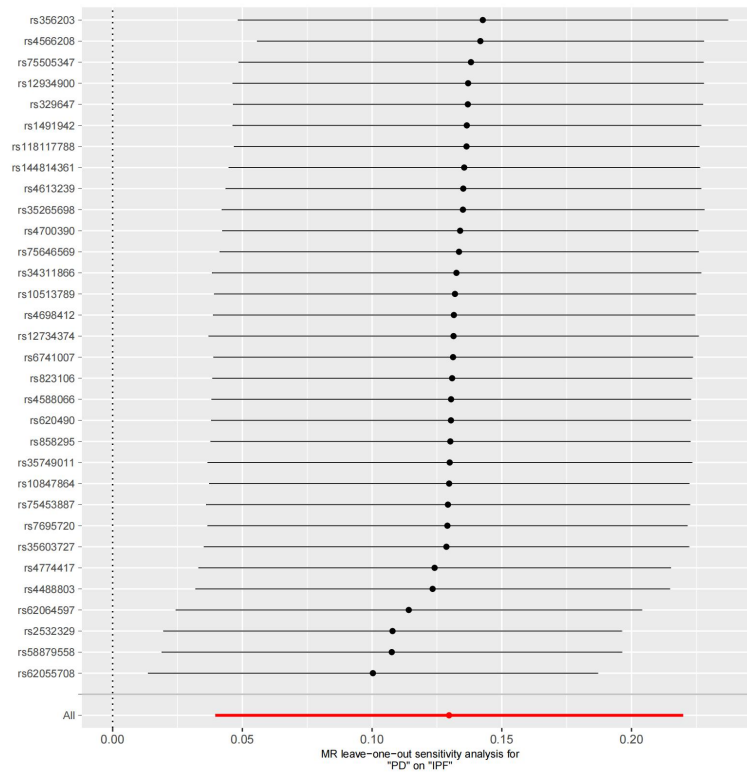

B)

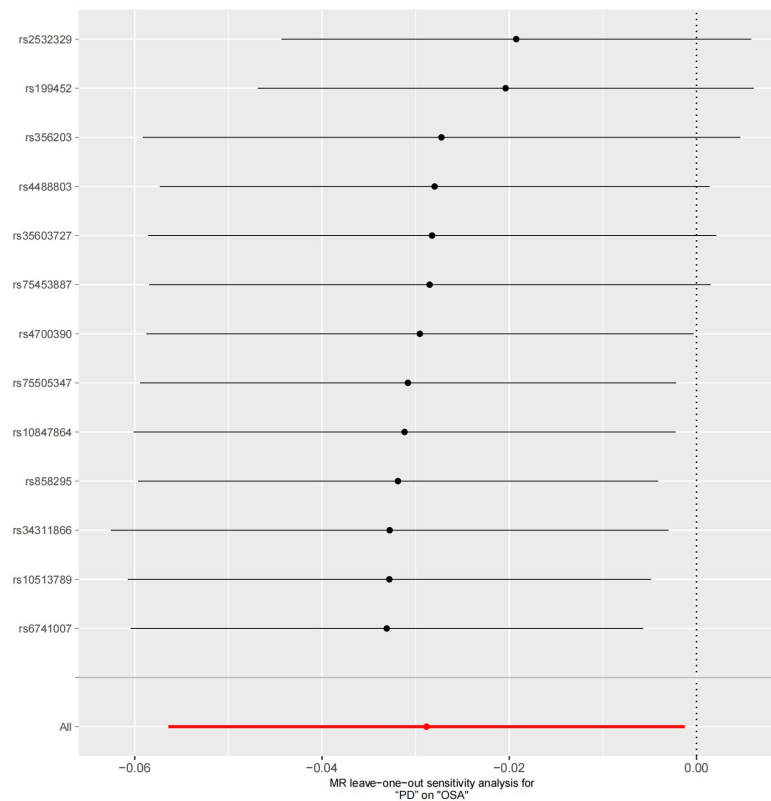

**Figure S2.**Manhattan plots of PLACO results for Parkinson's disease and A)chronic obstructive pulmonary disease , B) idiopathic pulmonary fibrosis, C)obstructive sleep apnea and D)asthma

A)

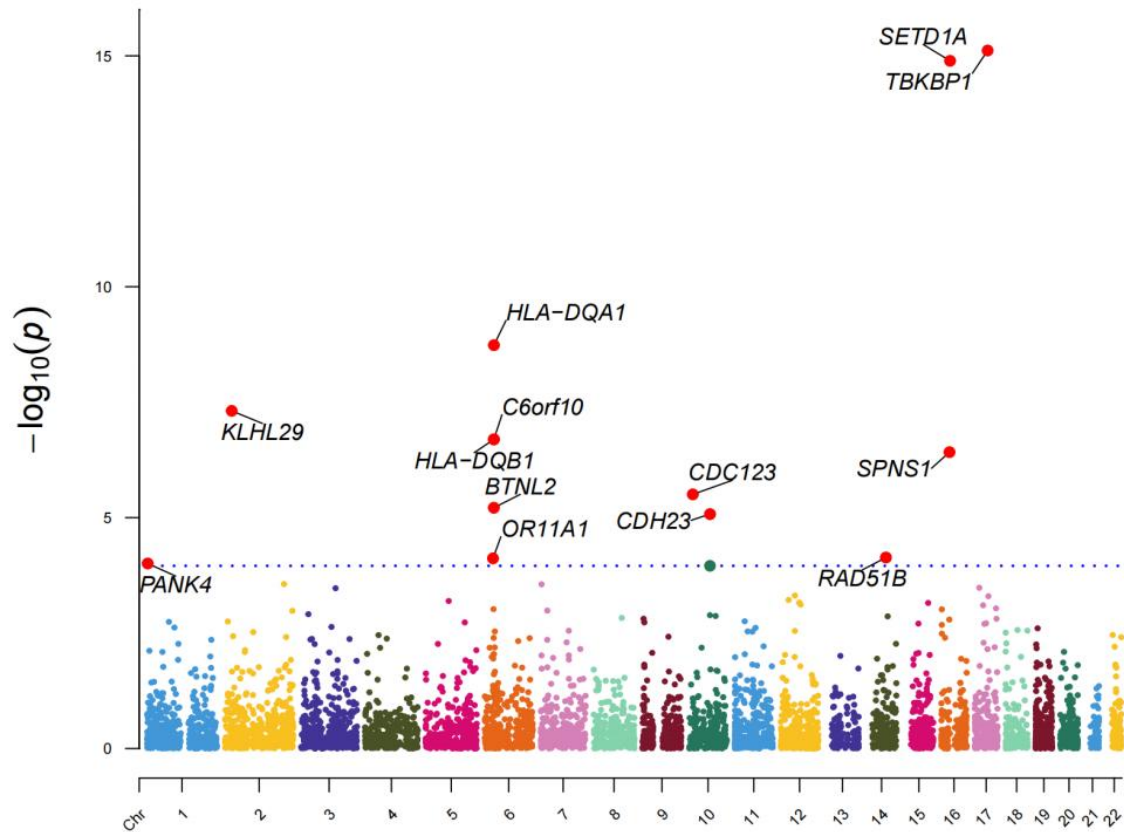

B)

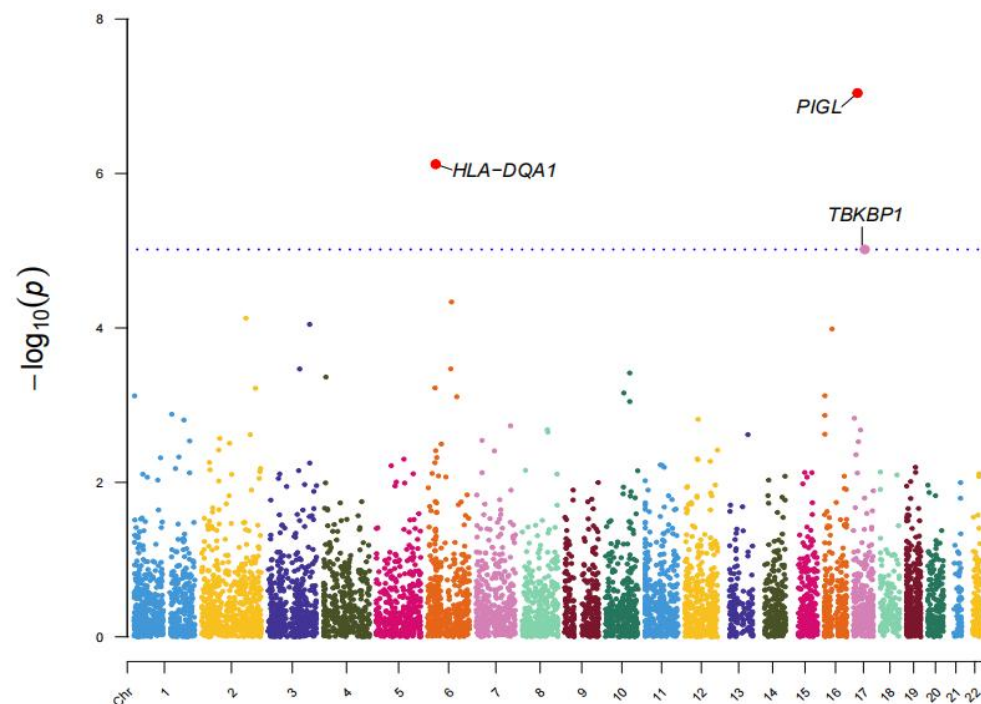

C)

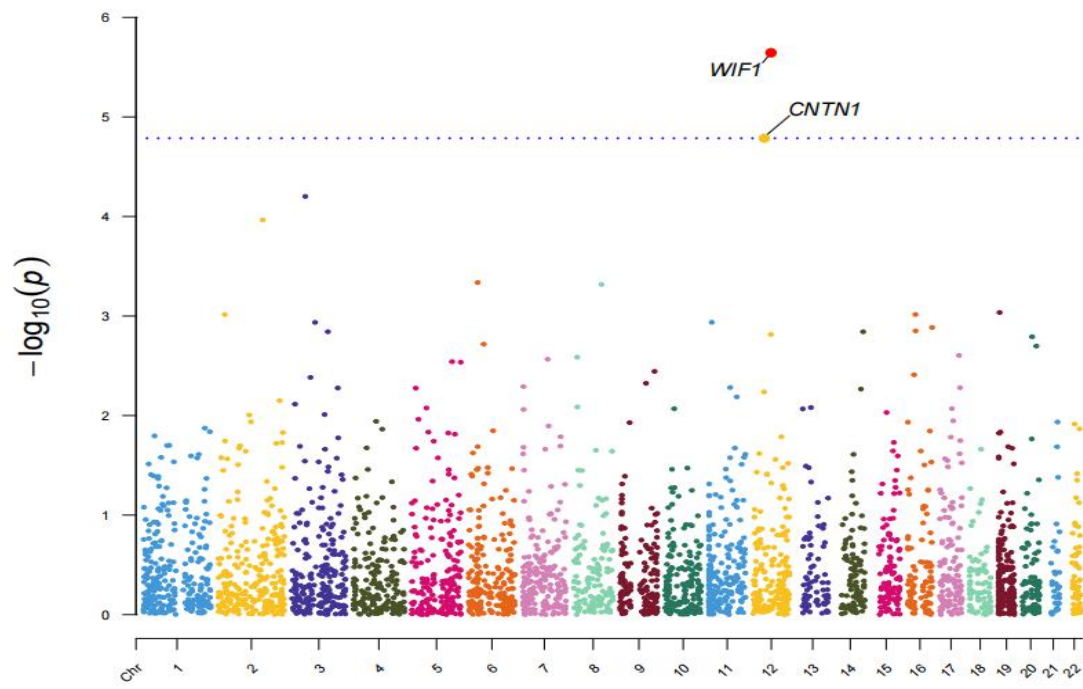

D)

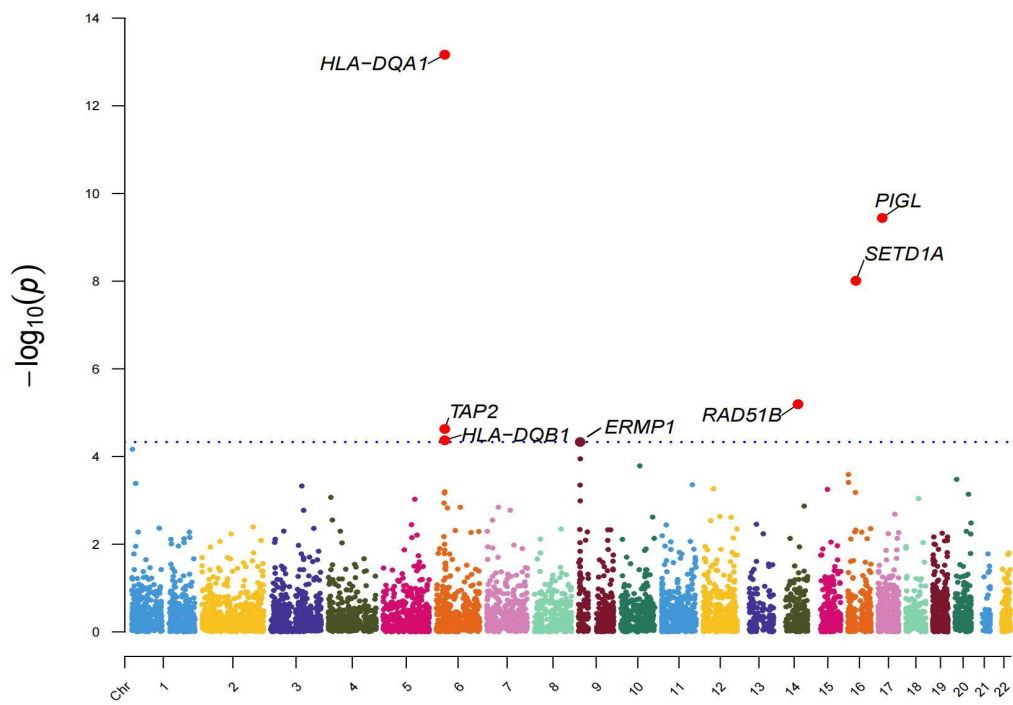

**Figure S3.**Quantile-Quantile (Q-Q) Plots of PLACO Results for Parkinson`s disease and A)chronic obstructive pulmonary disease , B) idiopathic pulmonary fibrosis, C)obstructive sleep apnea and D)asthma

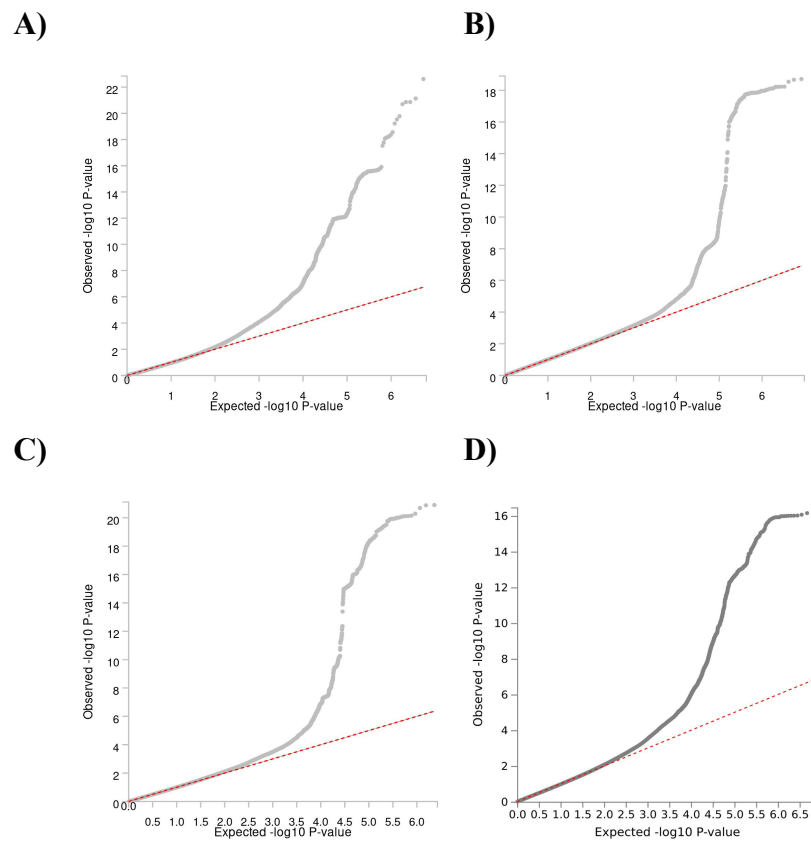

**Figure S4.**LocusZoom and LocusCompare Plots of Colocalized Locus A)SETD1A and B)PIGL

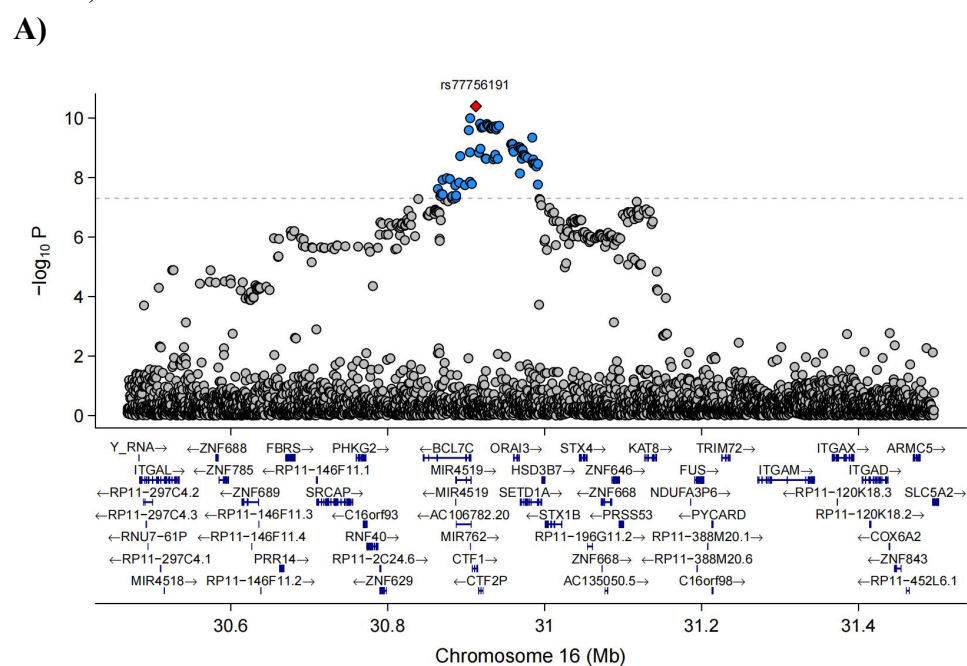

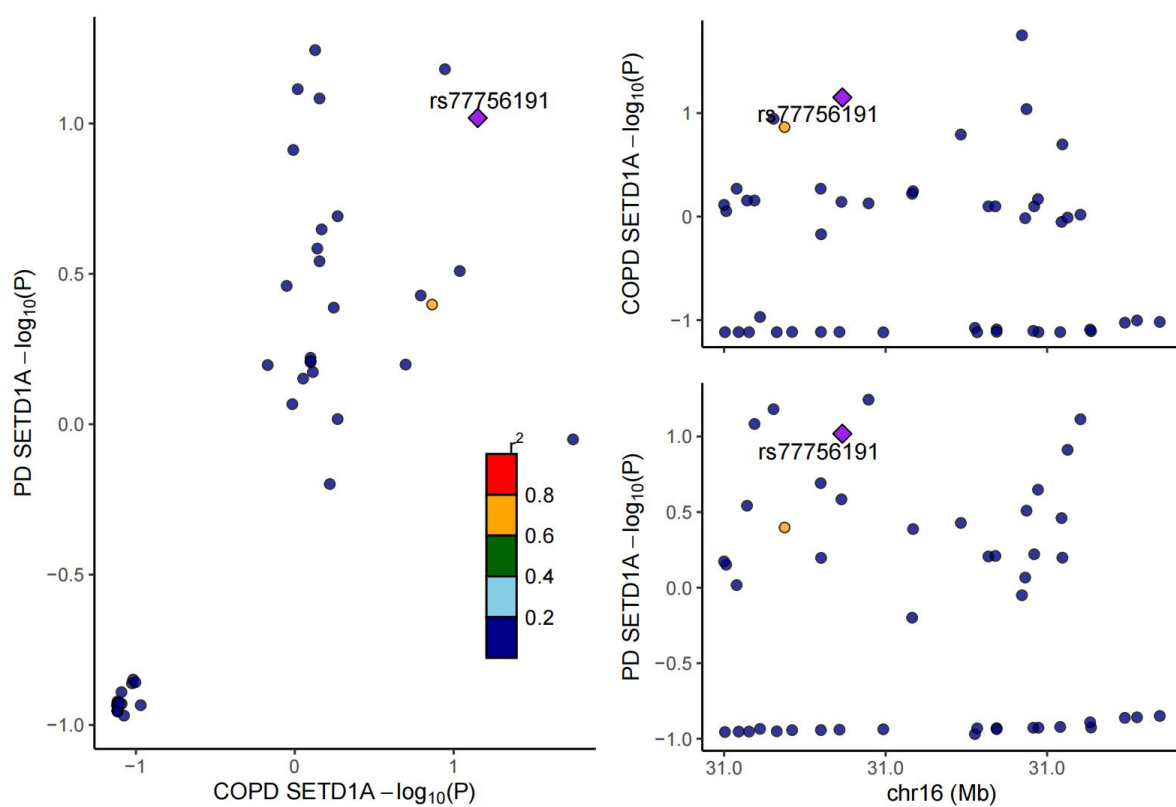

**B)**

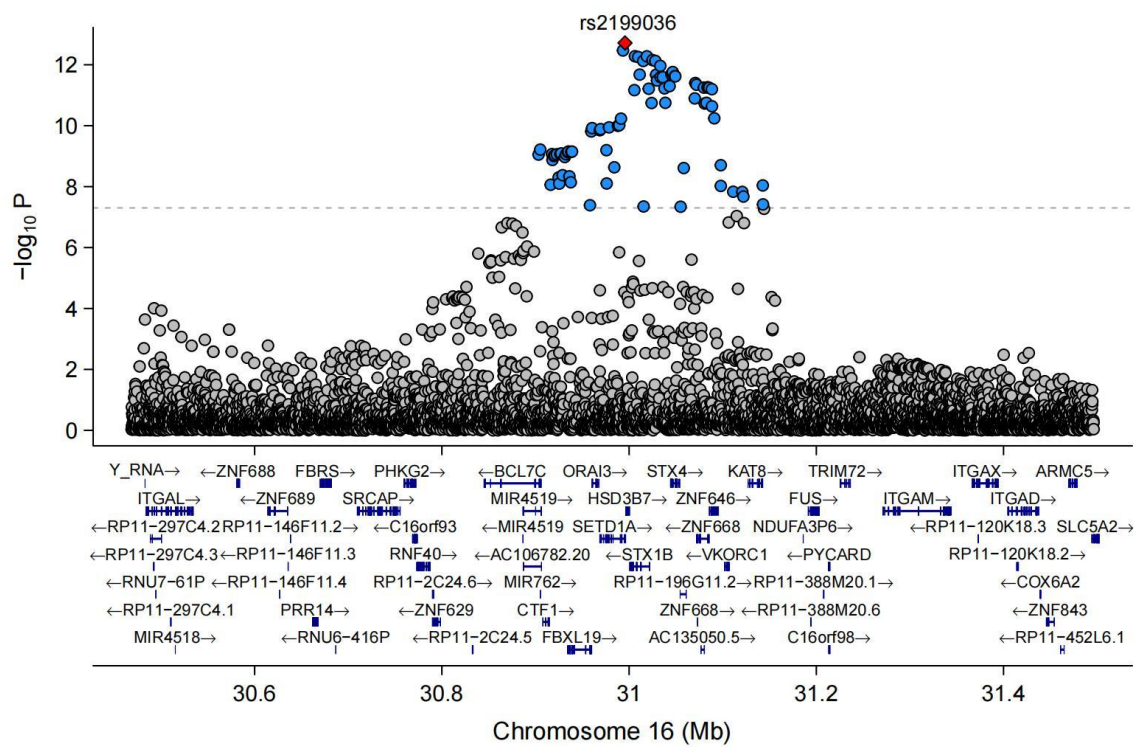



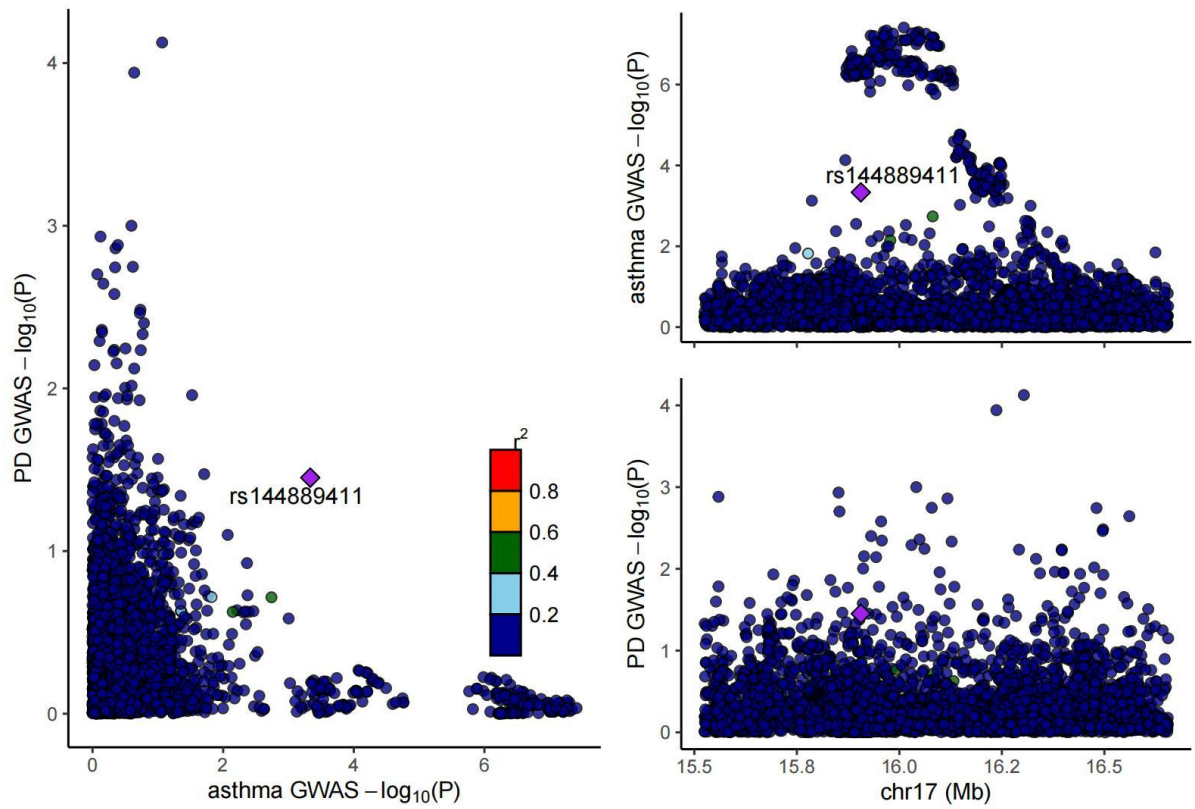

All genomic location is based on reference genome hg19, and LD calculation is based on 1000 Genomes Project of European population.



**Figure S5.** Star Bar Plot of colocalization results between PD and RD trait

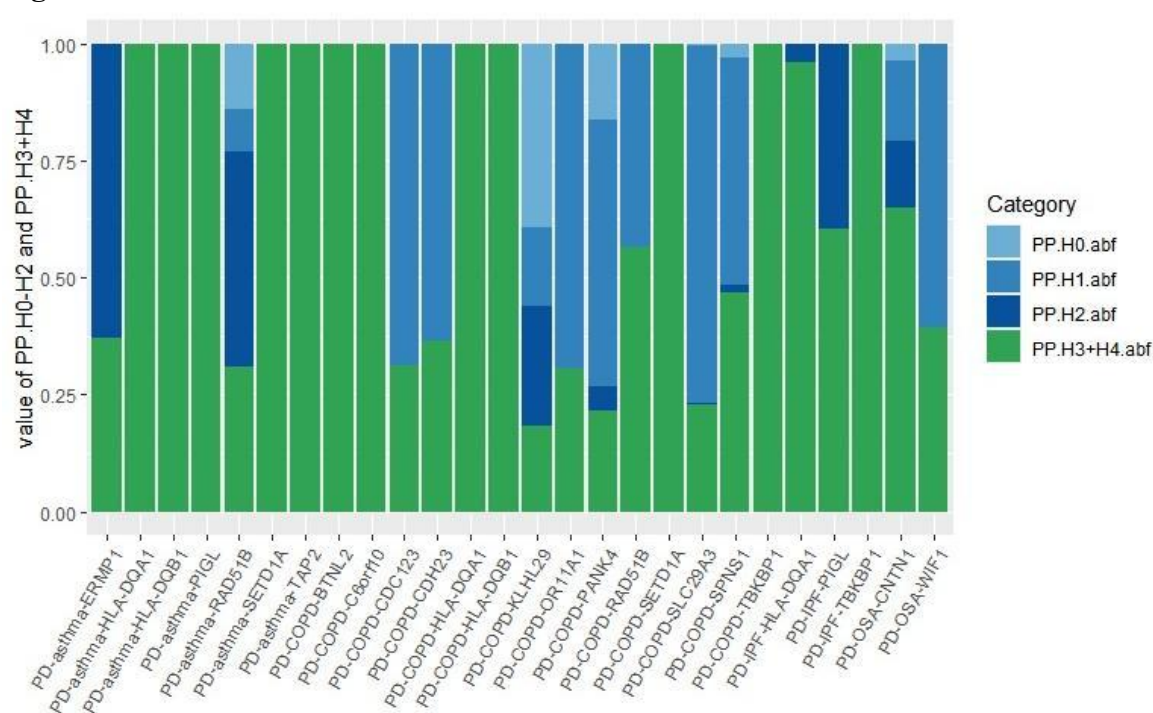

**Figure S6.**The transcriptomes form discrete cell-specific clusters using Uniform Manifold Approximation and Projection (UMAP) for peripheral blood mononuclear cell(PBMC) in idiopathic pulmonary fibrosis

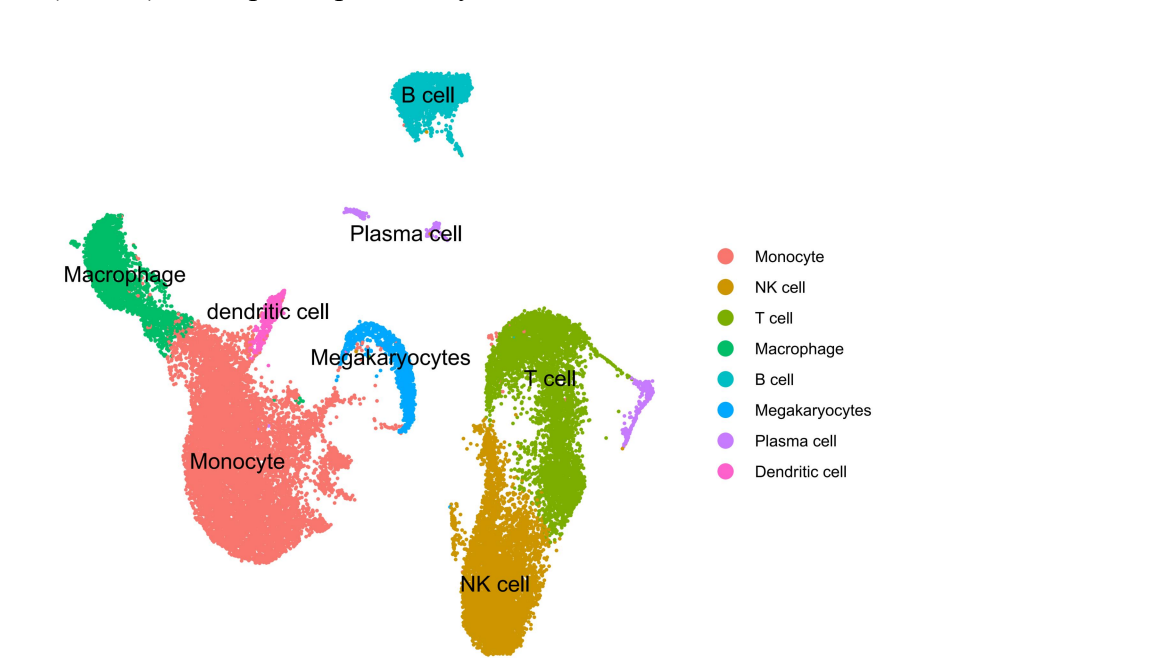

**Figure S7.** Expression of MAGMA-prioritized genes across cell-specific clusters from UMAP for A) peripheral blood mononuclear cell (PBMC) in Parkinson's disease, B) brain cell in Parkinson's disease, C) PBMC in chronic obstructive pulmonary disease and D) PBMC in idiopathic pulmonary fibrosis. Red indicates higher expression

A)

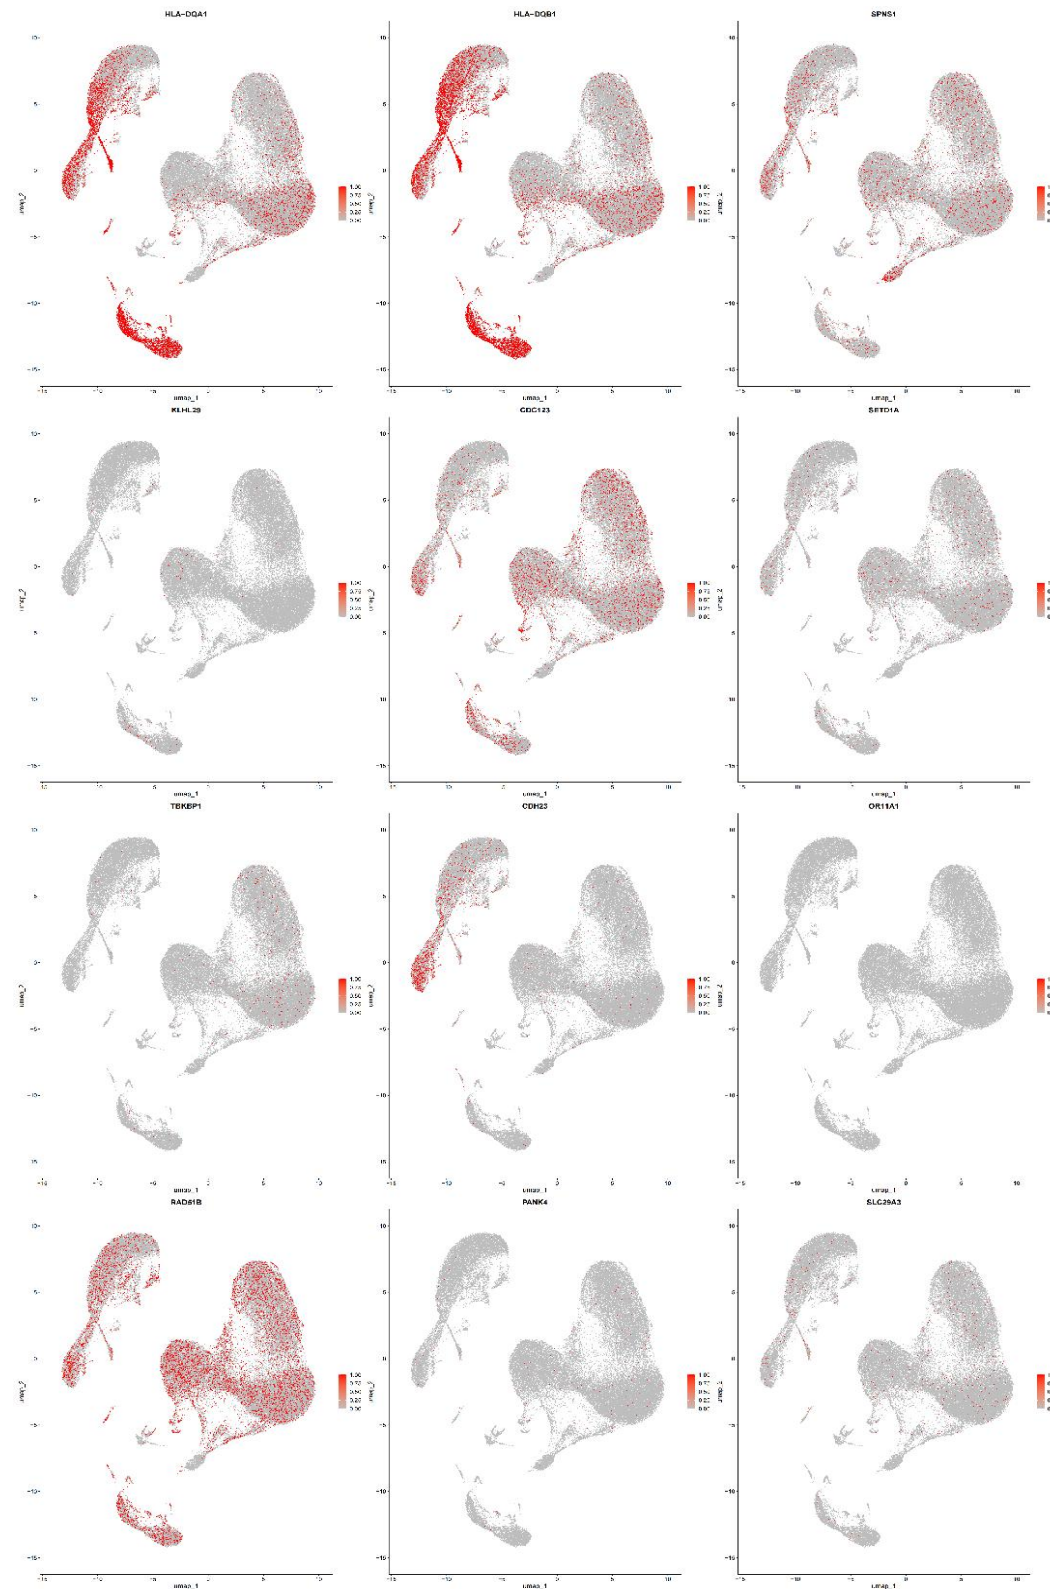

B)

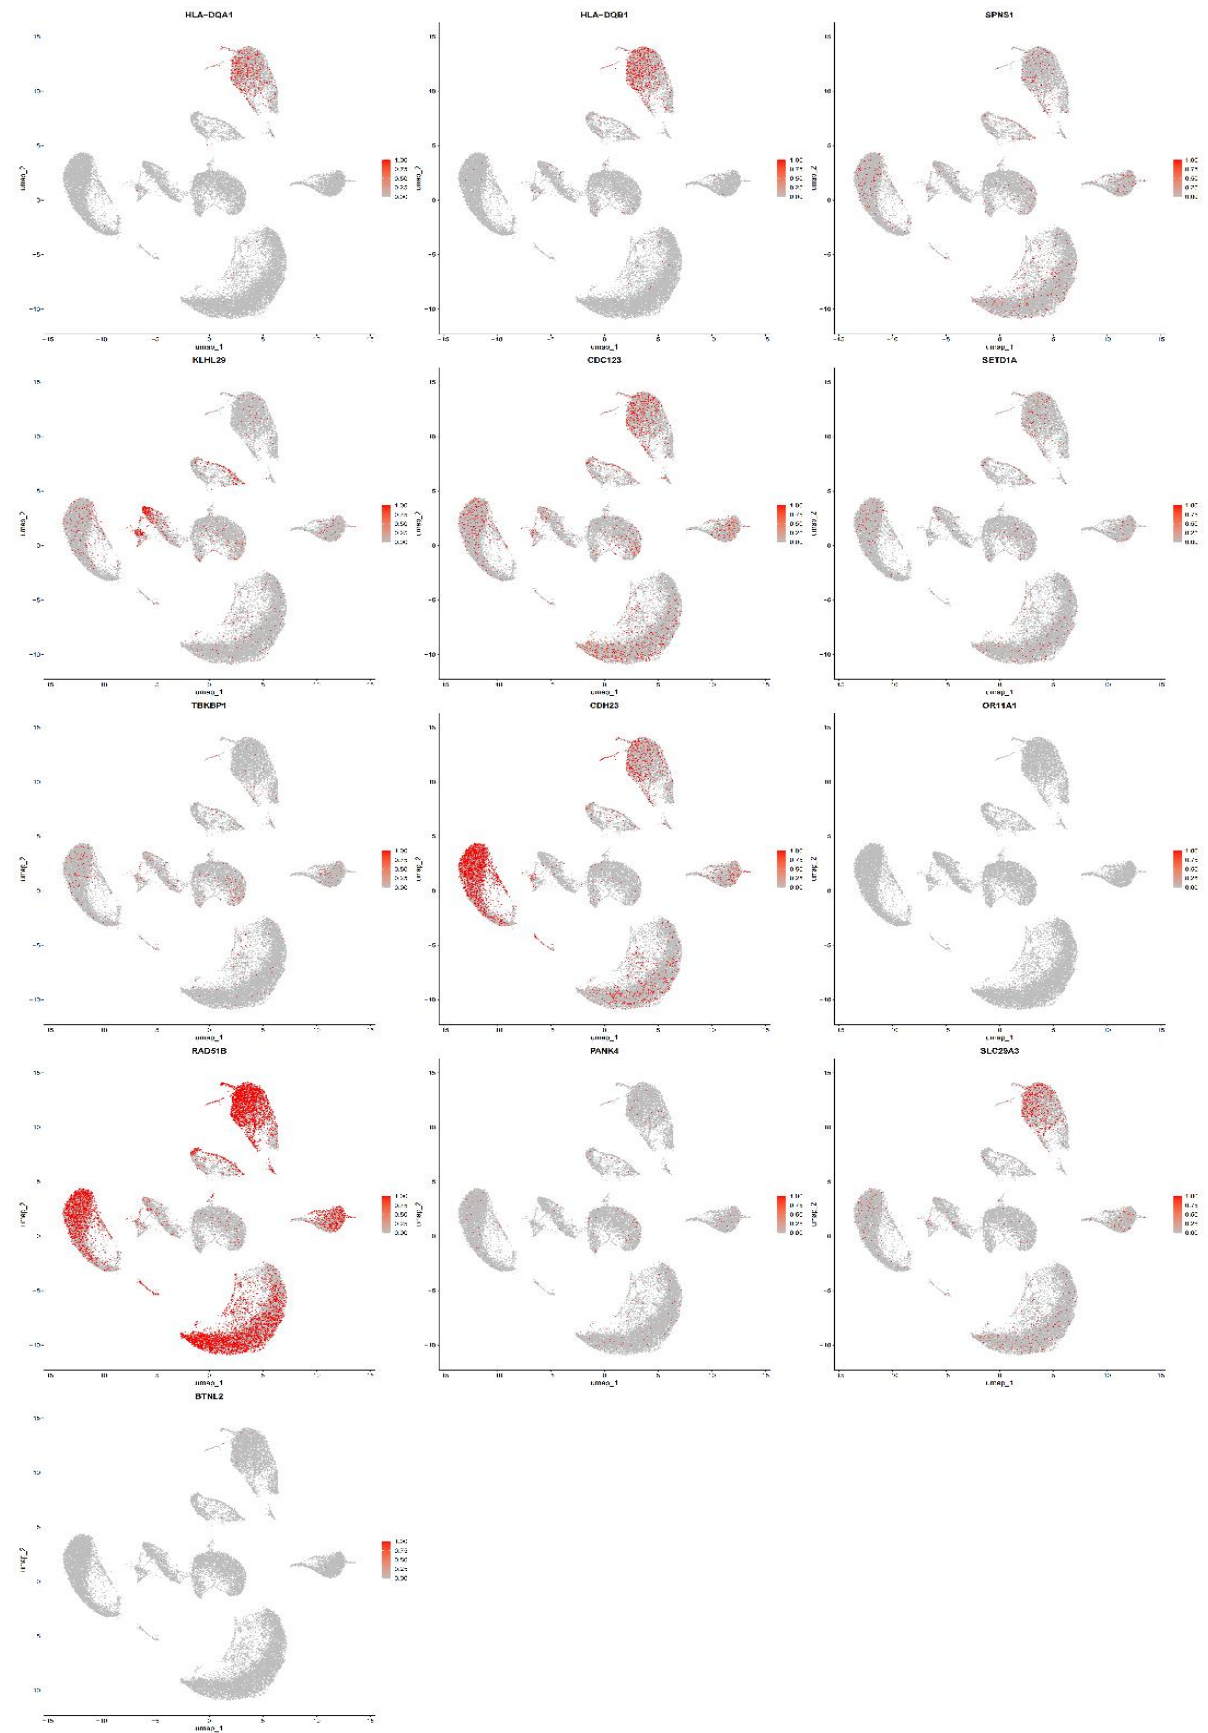



C)

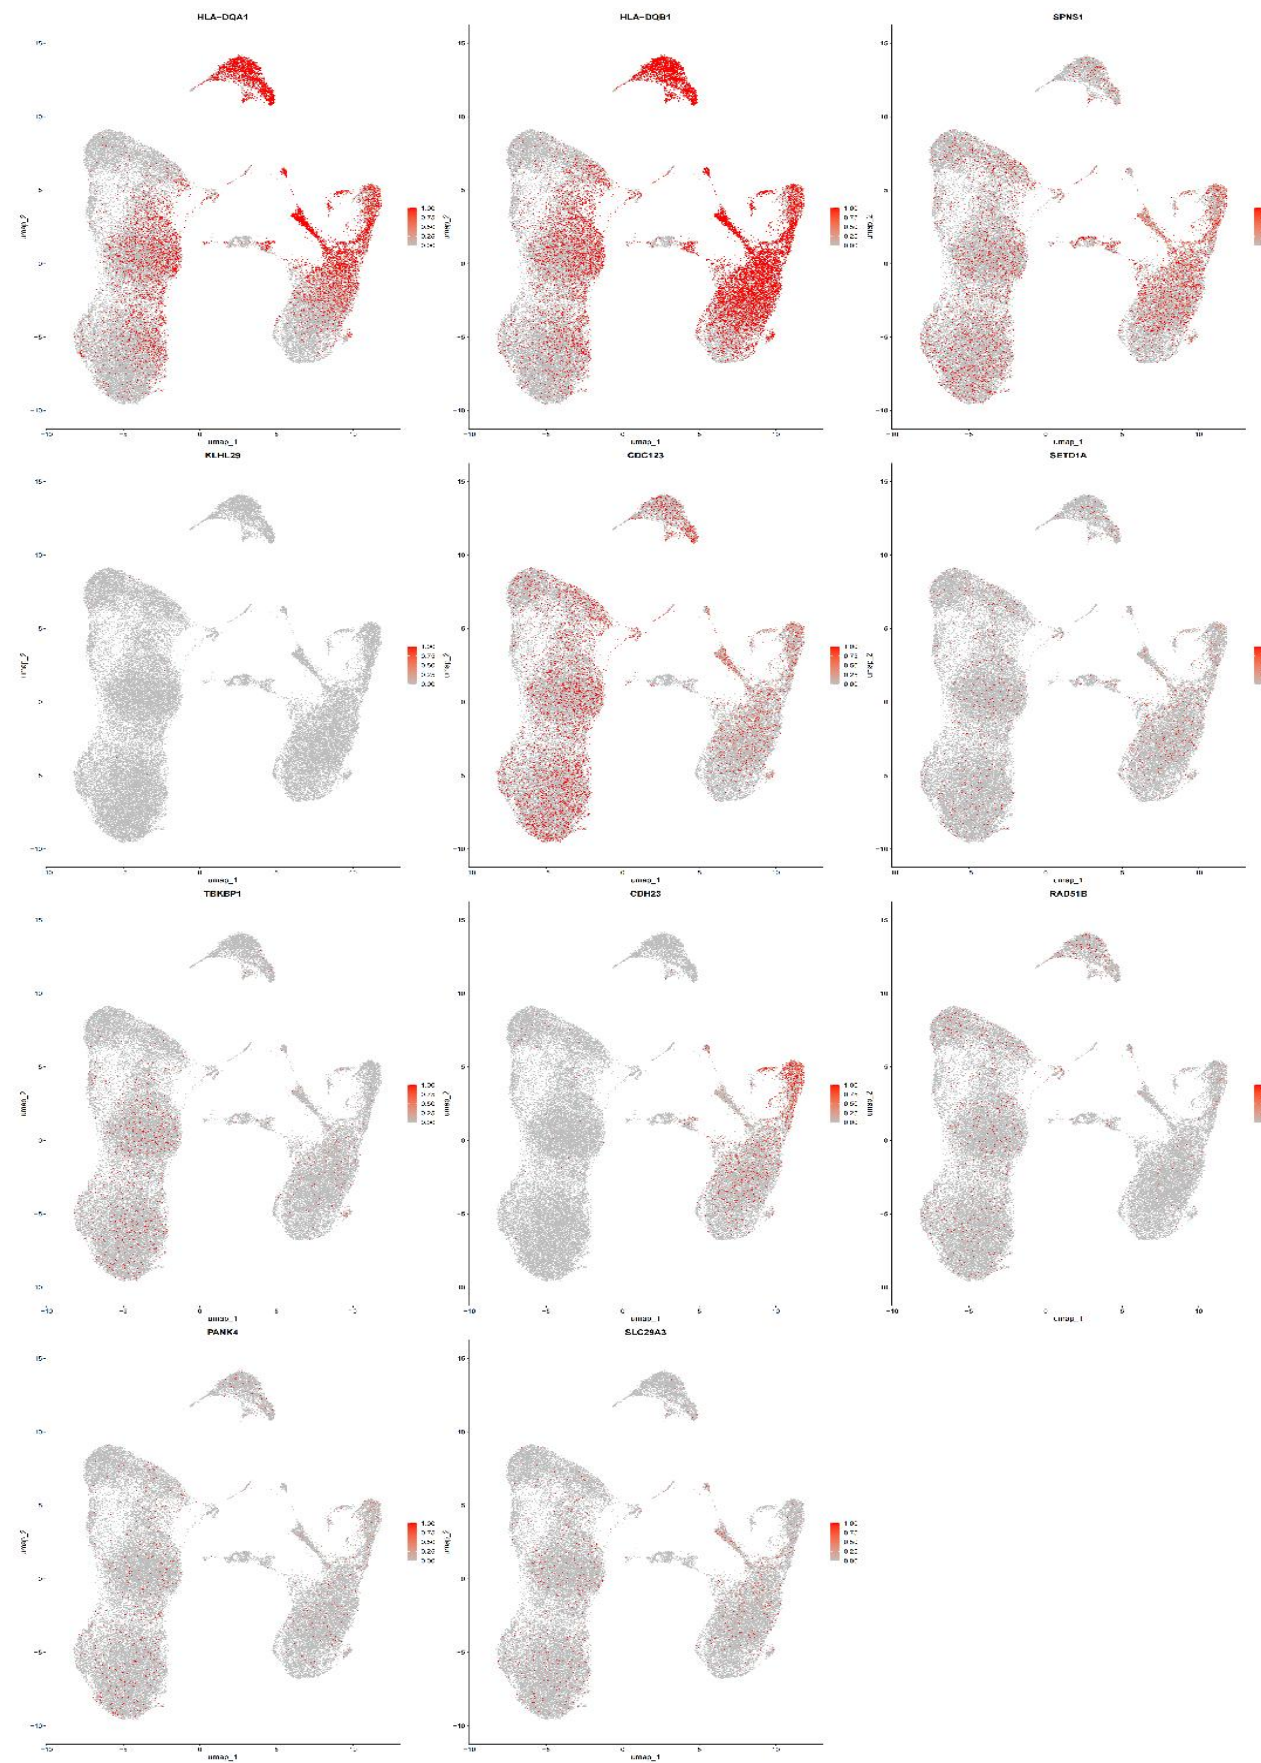

D)

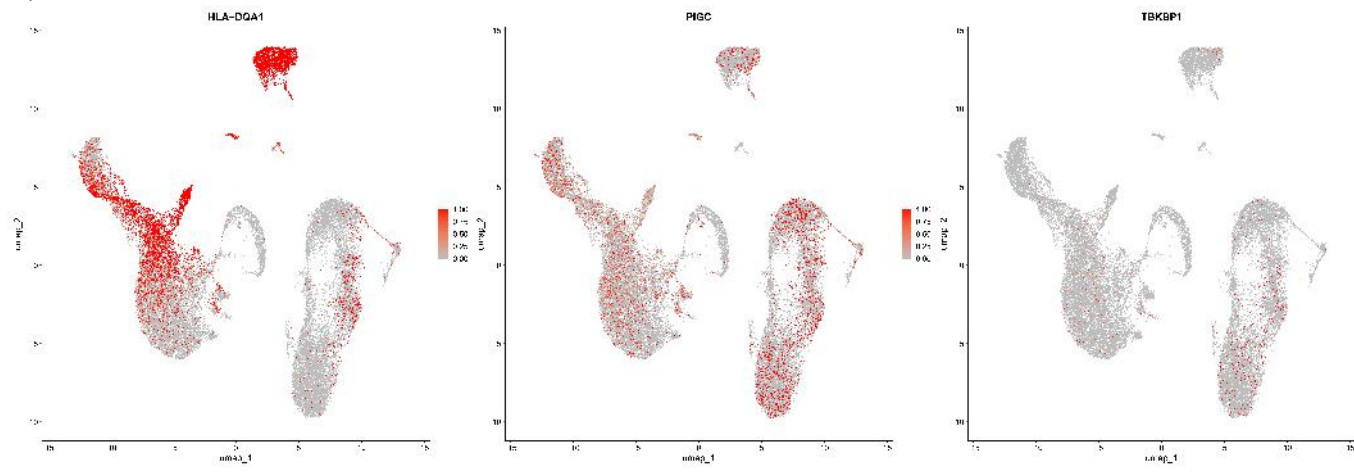

Supplement: Supplementary file 1 [file 396cad0ad67aa7b12e3d35f5.pdf]
