# Supplementary material for: Elucidating the Multitrait Association between Parkinson’s Disease and Respiratory Disorders: HLA gene complex as a causal nexus
Source: Research Square preprint supplement (doi:10.21203/rs.3.rs-7234326/v1), 2025-08-04
Supplement: Supplementary file 1 [file ccace29d088a9f5f591e8fd9.xlsx]

## Sheet: List of supplementary tables
Supplementary Tables
Table S1. Characteristics of the GWAS summary data
Table S2. Results of bidirectional Mendelian randomization analysis from main analysis and alternative methods between lung funtion, respiratory disorders and Parkinson`s diesase
Table S3. Results of two sample Mendelian randomization analysis between lung funtion, respiratory disorders and Parkinson`s diesase progression
Table S4. Genetic correlation using HDL and LDSC between PD and respiratory disorders
Table S5. PD-RD pleiotropic genes from PLACO with FUMA analysis
Table S6. Pleiotropic Genomic Loci Identified by FUMA Using PLACO Results
Table S7. Colocalization results for tests conducted between PD and RD traits in regions +/-500kb lead variants (r2 threshold = 0.1)
Table S8. SMR results for tests conducted between PD and all respiratory disorders traits using eQTL probes in region +/-250kb
Table S9. MAGMA-prioritized genes expression associated with Parkinson`s diesase and RD
Table S10. List of genes for HLA-DQ gene related module from PD and COPD traits constructed by hdWGCNA
Table S11. Gene Ontology enrichment analysis for HLA-DQA1 interacting modules associated with Parkinson`s diesase and chronic obstructive pulmonary disease(top 10 per GO datasets)
Table S12. Protein-protein interaction enrichment analysis for HLA-DQ interactomes module in PD and COPD trait(top 10 per GO datasets)

## Sheet: Table S1
Table S1. Characteristics of the GWAS summary data
Trait	Variable type	Authors	Ethnicity	Year	Sample size	SNPs	PMID
FEV1	Continuous	Shrine N et al.	European	2019	321047	19674931	30804560
FEV1/FVC	Continuous	Shrine N et al.	European	2019	321047	19671887	30804560
FVC	Continuous	Shrine N et al.	European	2019	321047	19676344	30804560
PEF	Continuous	Shrine N et al.	European	2019	321047	14791652	30804560
COPD	Binomial	Cosentino J et al.	European	2023	325027	13285083	37069358
IPF	Binomial	Zhou W et al.	European	2022	953873	NR	36777996
OSA	Binomial	Campos AI et al.	European	2022	159255	NR	36525587
asthma	Binomial	Zhou W et al.	European	2022	1376071	NR	36777996
PD risk at on set	Binomial	Nalls et al.	European	2019	482730	7784415	31701892
PD Progression	Binomial	Iwaki et al	European	2019	4093	NR	31505070
Dementia	Binomial
Constipation	Binomial
Depression	Binomial
Dyskinesia	Binomial
Hyposmia	Binomial
Insomnia	Binomial
RBD	Binomial
HY3	Binomial
HY	Binomial
Motor fluctuations	Binomial
Restless leg	Binomial
SEADL	Continuous
MMSE	Continuous
MOCA	Continuous
UPDRS total	Continuous
UPDRS I	Continuous
UPDRS II	Continuous
UPDRS III	Continuous
UPDRS IV	Continuous
Daytime sleep	Binomial
FEV1, forced expiratory volume in the frst second; FVC, forced vital capacity; PEF, peak expiratory fow; PD, Parkinson’s Disease; HY,Hoehn-Yahr stage; HY3, Hoehn-Yahr stage of 3 or more; RBD, Rapid eye movement sleep behaviour disorder; UPDRS, Unified Parkinson’s Disease Rating Scale; MMSE, Mini-Mental State Examination; MoCA, Montreal Cognitive Assessment; SEADL, Schwab and England Activities of…

## Sheet: Table S2
Table S2. Results of bidirectional Mendelian randomization analysis between lung funtion, respiratory disorders and Parkinson`s diesase risk at onset
Exposure	Outcome	nSNPs	Mean_F_Stat	Min_F_Stat	Max_F_Stat	IVW_BETA	IVW_SE	IVW_pval	IVW_beta_lo_ci	IVW_up_lo_ci	IVW_or	IVW_or_lci95	IVW_or_uci95	Weighted_Median_BETA	Weighted_Median_SE	Weighted_Median_pval	Weighted_Median_beta_lo_ci	Weighted_Median_up_lo_ci	Weighted_Median_or	Weighted_Median_or_lci95	Weighted_Median_or_uci95	Weighted_Mode_BETA	Weighted_Mode_SE	Weighted_Mode_pval	Weighted_Mode_beta_lo_ci	Weighted_Mode_up_lo_ci	Weighted_Mode_or	Weighted_Mode_or_lci95	Weighted_Mode_or_uci95	MR_Egger_BETA	MR_Egger_SE	MR_Egger_pval	MR_Egger_beta_lo_ci	MR_Egger_up_lo_ci	MR_Egger_or	MR_Egger_or_lci95	MR_Egger_or_uci95	Egger_Intercept	Egger_Intercept_SE	Egger_Intercept_pval	MR_Egger_Q	MR_Egger_Q_df	MR_Egger_Q_pval	IVW_Q	IVW_Q_df	IVW_Q_pval	MR_PRESSO_BETA	MR_PRESSO_SE	MR_PRESSO_pval
COPD	PD	507	64.76	27.2906	706.412	-0.0202878	0.0608853	0.738973	-0.139623	0.0990473	0.979917	0.869686	1.10412	0.0838804	0.183446	0.647688	-0.275673	0.443434	1.0875	0.759061	1.55805	0.0274043	0.0873294	0.75367	-0.143761	0.19857	1.02778	0.866094	1.21966	0.0779084	0.151705	0.607789	-0.219433	0.375249	1.08102	0.802974	1.45535	-0.00215477	0.00304878	0.480038	642.494	505	3.07689e-05	643.13	506	3.25277e-05	-0.0202878	0.0608853	0.739111
FEV1	PD	353	56.15	27.4376	346.338	0.0381484	0.0627947	0.543513	-0.0849292	0.161226	1.03889	0.918577	1.17495	-0.0648046	0.0861815	0.452078	-0.23372	0.104111	0.937251	0.791583	1.10972	-0.337475	0.228898	0.141282	-0.786115	0.111165	0.71357	0.455611	1.11758	-0.0984065	0.187692	0.600403	-0.466284	0.269471	0.90628	0.627329	1.30927	0.00327813	0.00424578	0.44058	452.058	351	0.000212463	452.825	352	0.000221997	0.0381484	0.0627947	0.543904
FEV1/FVC	PD	500	72.11	26.4082	768.755	-0.0926687	0.0491214	0.0592246	-0.188947	0.00360932	0.911495	0.827831	1.00362	-0.143786	0.0694623	0.0384536	-0.279932	-0.00763992	0.866073	0.755835	0.992389	-0.156468	0.105582	0.138984	-0.363408	0.0504732	0.855159	0.695302	1.05177	-0.217218	0.110686	0.0502635	-0.434161	-0.00027399	0.804755	0.647808	0.999726	0.00373576	0.00297551	0.209886	726.297	498	9.18785e-11	728.596	499	7.6954e-11	-0.0926687	0.0491214	0.0598049
FVC	PD	306	49.63	28.519	206.434	-0.0705944	0.0732124	0.334925	-0.214091	0.072902	0.93184	0.807275	1.07563	-0.065386	0.0969362	0.499977	-0.255381	0.124609	0.936706	0.774621	1.13271	-0.333841	0.343553	0.331955	-1.00721	0.339524	0.716168	0.365238	1.40428	0.187717	0.255001	0.462211	-0.312085	0.68752	1.20649	0.73192	1.98878	-0.0057324	0.00542077	0.291129	430.878	304	2.19855e-06	432.463	305	2.06702e-06	-0.0705944	0.0732124	0.335689
IPF	PD	12	89.29	30.1696	594.555	0.00207054	0.0346155	0.952303	-0.0657759	0.069917	1.00207	0.936341	1.07242	-0.011233	0.0403153	0.78053	-0.0902509	0.0677849	0.98883	0.913702	1.07014	-0.0137244	0.0463497	0.772665	-0.10457	0.0771211	0.986369	0.900712	1.08017	0.036902	0.0542083	0.511486	-0.0693462	0.14315	1.03759	0.933004	1.1539	-0.0111319	0.0132078	0.419024	11.8893	10	0.292535	12.7338	11	0.311076	0.00207054	0.0346155	0.953376
OSA	PD	41	39.12	29.9088	102.432	-0.180723	0.18071	0.317277	-0.534916	0.173469	0.834666	0.585719	1.18942	-0.0570376	0.197259	0.772466	-0.443666	0.32959	0.944559	0.64168	1.3904	0.0306499	0.288356	0.915882	-0.534527	0.595827	1.03112	0.585946	1.81453	-0.689038	0.826732	0.409668	-2.30943	0.931357	0.502059	0.0993176	2.53795	0.0131006	0.0207838	0.532157	75.5446	39	0.000402511	76.3142	40	0.000472077	-0.180723	0.18071	0.323288
PD	IPF	32	58.51	30.0213	181.492	0.129669	0.0459643	0.0047862	0.039579	0.219759	1.13845	1.04037	1.24578	0.087646	0.0417441	0.035764	0.00582749	0.169464	1.0916	1.00584	1.18467	0.0834579	0.0566684	0.150902	-0.0276121	0.194528	1.08704	0.972766	1.21474	0.231194	0.10477	0.035132	0.0258441	0.436544	1.2601	1.02618	1.54735	-0.0200351	0.0185911	0.289769	98.6092	30	3.07493e-09	102.427	31	1.44469e-09	0.129669	0.0459643	0.00827645
PD	OSA	13	66.68	32.5875	181.492	-0.02884	0.0140599	0.0402453	-0.0563975	-0.00128258	0.971572	0.945163	0.998718	-0.033736	0.0112047	0.00260499	-0.0556972	-0.0117747	0.966827	0.945825	0.988294	-0.0266136	0.0153599	0.108751	-0.056719	0.00349178	0.973737	0.94486	1.0035	-0.0784844	0.0344615	0.0437316	-0.146029	-0.0109398	0.924517	0.864133	0.98912	0.0102669	0.00657594	0.146749	43.2635	11	9.77164e-06	52.8507	12	4.37908e-07	-0.02884	0.0140599	0.0627362
PD	FEV1/FVC	67	33.49	19.5485	181.492	0.00542222	0.00402946	0.178417	-0.00247552	0.01332	1.00544	0.997528	-0.000433155	0.00489717	0.929519	-0.0100316	0.00916529	0.999567	0.990019	1.00921	-0.00295495	-0.00295495	0.00948868	0.756464	-0.0215528	0.0156429	0.997049	0.978678	1.01577	0.00913034	0.00827802	0.274111	-0.00709458	0.0253553	1.00917	0.992931	1.02568	-0.000646573	0.00125866	0.609203	119.307	65	4.68381e-05	119.791	66	5.76174e-05	0.00542222	0.00402946	0.183022
PD	FVC	26	55.73	30.0213	181.492	0.00897907	0.00721029	0.213017	-0.0051531	0.0231112	1.00902	0.99486	1.02338	0.0180644	0.0161239	0.273213	-0.0135385	0.0496672	1.01823	0.986553	1.05092	0.0103529	0.00690127	0.133579	-0.00317363	0.0238793	1.01041	0.996831	1.02417	-0.0102342	0.0150088	0.501843	-0.0396514	0.019183	0.989818	0.961124	1.01937	0.00373621	0.00257594	0.159885	73.7698	24	5.78972e-07	80.2361	25	1.04782e-07	0.00897907	0.00721029	0.224563
PD	COPD	27	55.51	30.0213	181.492	0.00671413	0.00542821	0.216126	-0.00392517	0.0173534	1.00674	0.996083	1.0175	0.00259136	0.00515358	0.615086	-0.00750965	0.0126924	1.00259	0.992518	1.01277	0.00179048	0.00669164	0.791141	-0.0113251	0.0149061	1.00179	0.988739	1.01502	0.00903462	0.0118922	0.454534	-0.0142741	0.0323434	1.00908	0.985827	1.03287	-0.000443787	0.00201346	0.827342	75.9042	25	4.931e-07	76.0517	26	8.39361e-07	0.00671413	0.00542821	0.227182
PD	FEV1	20	55.36	30.0213	181.492	0.0099382	0.00687877	0.148524	-0.00354419	0.0234206	1.00999	0.996462	1.0237	0.00668338	0.00710472	0.346861	-0.00724187	0.0206086	1.00671	0.992784	1.02082	-0.0023306	0.0119427	0.847349	-0.0257383	0.0210771	0.997672	0.97459	1.0213	-0.00749964	0.0165428	0.655715	-0.0399234	0.0249242	0.992528	0.960863	1.02524	0.00304069	0.0026282	0.262417	40.7161	18	0.00166576	43.7439	19	0.00102455	0.0099382	0.00687877	0.164815
PD	PEF	20	55.67	30.0213	181.492	0.00601824	0.00872449	0.490314	-0.0110818	0.0231183	1.00604	0.988979	1.02339	0.0110234	0.00764528	0.149342	-0.00396134	0.0260082	1.01108	0.996046	1.02635	0.00337154	0.0105544	0.752875	-0.017315	0.0240581	1.00338	0.982834	1.02435	0.00826754	0.0217071	0.707759	-0.0342784	0.0508135	1.0083	0.966302	1.05213	-0.000381249	0.0033512	0.910683	66.6423	18	1.65722e-07	66.6902	19	3.23566e-07	0.00601824	0.00872449	0.498653
PEF	PD	322	67.59	27.3244	692.839	-0.0255383	0.0569537	0.653861	-0.137168	0.086091	0.974785	0.871824	1.08991	-0.124623	0.0888022	0.160505	-0.298675	0.0494297	0.88283	0.7418	1.05067	-0.343171	0.157386	0.0299503	-0.651646	-0.034695	0.709517	0.521187	0.9659	-0.331142	0.142377	0.0206532	-0.610201	-0.052083	0.718103	0.543242	0.94925	0.00845844	0.00361638	0.0199545	364.458	320	0.0438138	370.688	321	0.0291055	-0.0255383	0.0569537	0.654164
[truncated: 5 more columns]

## Sheet: Table S3
Table S3. Results of two sample Mendelian randomization analysis between lung funtion, respiratory distress and Parkinson`s diesase progression
Exposure	Outcome	nSNPs	Mean_F_Stat	Min_F_Stat	Max_F_Stat	IVW_BETA	IVW_SE	IVW_pval	IVW_beta_lo_ci	IVW_up_lo_ci	IVW_or	IVW_or_lci95	IVW_or_uci95	Weighted_Median_BETA	Weighted_Median_SE	Weighted_Median_pval	Weighted_Median_beta_lo_ci	Weighted_Median_up_lo_ci	Weighted_Median_or	Weighted_Median_or_lci95	Weighted_Median_or_uci95	Weighted_Mode_BETA	Weighted_Mode_SE	Weighted_Mode_pval	Weighted_Mode_beta_lo_ci	Weighted_Mode_up_lo_ci	Weighted_Mode_or	Weighted_Mode_or_lci95	Weighted_Mode_or_uci95	MR_Egger_BETA	MR_Egger_SE	MR_Egger_pval	MR_Egger_beta_lo_ci	MR_Egger_up_lo_ci	MR_Egger_or	MR_Egger_or_lci95	MR_Egger_or_uci95	Egger_Intercept	Egger_Intercept_SE	Egger_Intercept_pval	MR_Egger_Q	MR_Egger_Q_df	MR_Egger_Q_pval	IVW_Q	IVW_Q_df	IVW_Q_pval	MR_PRESSO_BETA	MR_PRESSO_SE	MR_PRESSO_pval
COPD	UPDRS III	176	76.82	28.8438	706.412	0.250403	0.126402	0.0475907	0.00265507	0.49815	1.28454	1.00266	1.64567	0.247534	0.205357	0.228056	-0.154966	0.650034	1.28086	0.856444	1.91561	0.136592	0.24967	0.585015	-0.352762	0.625945	1.14636	0.702744	1.87001	0.0787297	0.305449	0.796904	-0.519951	0.677411	1.08191	0.59455	1.96877	0.00435862	0.00705989	0.537793	157.258	174	0.813788	157.639	175	0.82242	0.250403	0.119968	0.0383151
COPD	Hyposmia	177	79.15	28.8438	706.412	-0.68865	0.35987	0.0556703	-1.394	0.0166953	0.502254	0.248082	1.01684	-1.24324	0.873382	0.156378	-2.95507	0.468588	0.288448	0.0520751	1.59774	-1.16368	0.892388	0.193935	-2.91276	0.585403	0.312336	0.0543258	1.79571	-1.24324	0.873382	0.156378	-2.95507	0.468588	0.288448	0.0520751	1.59774	0.0139207	0.0199752	0.48679	173.979	175	0.507582	174.465	176	0.51854	-0.68865	0.358297	0.0562201
COPD	UPDRS IV	166	81.47	28.8438	706.412	-0.263163	0.140492	0.0610475	-0.538528	0.0122016	0.768617	0.583607	1.01228	-0.203969	0.228172	0.37136	-0.651186	0.243248	0.815487	0.521427	1.27538	-0.218481	0.224077	0.330975	-0.657672	0.220711	0.803739	0.518056	1.24696	0.111773	0.324255	0.730756	-0.523767	0.747313	1.11826	0.592285	2.11132	-0.0102007	0.00795076	0.201309	155.307	164	0.674279	156.953	165	0.660389	-0.263163	0.137023	0.0565106
COPD	HY	179	75.44	28.8438	706.412	0.0708165	0.0424515	0.0952812	-0.0123885	0.154021	1.07338	0.987688	1.16652	0.0558641	0.0666112	0.401661	-0.0746939	0.186422	1.05745	0.928028	1.20493	0.0751511	0.0930823	0.420536	-0.10729	0.257592	1.07805	0.898265	1.29381	0.144699	0.1056	0.172341	-0.0622764	0.351674	1.15569	0.939623	1.42145	-0.00183343	0.00239944	0.44582	164.81	177	0.734913	165.394	178	0.741839	0.0708165	0.0409207	0.0852598
COPD	Insomnia	179	77.93	28.8438	706.412	0.437323	0.328864	0.183585	-0.207251	1.0819	1.54856	0.812816	2.95027	0.0860668	0.535416	0.872292	-0.963349	1.13548	1.08988	0.381613	3.11267	-0.00911024	0.66122	0.989023	-1.3051	1.28688	0.990931	0.271145	3.62147	0.193006	0.792327	0.807828	-1.35996	1.74597	1.21289	0.256672	5.73144	0.00614118	0.0181195	0.735066	172.327	177	0.585134	172.442	178	0.603435	0.437323	0.323689	0.178392
COPD	UPDRS I	168	78.86	28.8438	706.412	0.18609	0.154212	0.227541	-0.116165	0.488344	1.20453	0.890328	1.62962	0.146193	0.244348	0.549641	-0.33273	0.625116	1.15742	0.716964	1.86846	0.0780748	0.28079	0.781315	-0.472273	0.628423	1.0812	0.623583	1.87465	-0.0992213	0.372633	0.790361	-0.829582	0.63114	0.905542	0.436231	1.87975	0.00732484	0.00870901	0.401522	161.448	166	0.585291	162.156	167	0.591382	0.18609	0.151958	0.222447
COPD	HY3	178	78.93	28.8438	706.412	0.642698	0.554797	0.246685	-0.444704	1.7301	1.90161	0.641014	5.64122	0.787293	0.884894	0.373625	-0.9471	2.52169	2.19744	0.387864	12.4496	0.806443	1.10281	0.465587	-1.35507	2.96795	2.23993	0.25793	19.4521	0.824507	1.3343	0.537418	-1.79071	3.43973	2.28076	0.166841	31.1784	-0.00452037	0.0301538	0.881007	183.367	176	0.336248	183.39	177	0.35533	0.642698	0.554797	0.248246
COPD	Restless leg	98	92.23	28.8438	706.412	-0.697316	0.685287	0.30889	-2.04048	0.645846	0.49792	0.129967	1.9076	-0.590396	1.05992	0.577516	-2.66785	1.48705	0.554108	0.0694015	4.42405	-0.766422	1.50909	0.612697	-3.72424	2.19139	0.464672	0.0241315	8.94766	-0.695879	1.58186	0.660989	-3.79632	2.40456	0.498636	0.0224532	11.0736	-3.71564e-05	0.0368699	0.999198	81.1696	96	0.860417	81.1696	97	0.876254	-0.697316	0.626878	0.268731
COPD	UPDRS total	165	79.16	28.8438	706.412	0.122973	0.121922	0.313156	-0.115994	0.36194	1.13085	0.890481	1.43611	-0.0046982	0.190528	0.980327	-0.378133	0.368736	0.995313	0.685139	1.44591	-0.0921452	0.243153	0.705208	-0.568725	0.384434	0.911973	0.566247	1.46878	-0.139397	0.294383	0.636475	-0.716388	0.437595	0.869883	0.488514	1.54898	0.0066926	0.00683492	0.328943	133.546	163	0.955799	134.505	164	0.955485	0.122973	0.110415	0.267023
COPD	UPDRS II	163	76.78	28.8438	706.412	0.124456	0.160634	0.438471	-0.190387	0.439298	1.13253	0.826639	1.55162	0.0646442	0.257647	0.80189	-0.440344	0.569632	1.06678	0.643815	1.76762	0.107535	0.259906	0.679607	-0.401881	0.616951	1.11353	0.66906	1.85327	0.337906	0.376654	0.370992	-0.400336	1.07615	1.40201	0.670095	2.93336	-0.00555016	0.00885848	0.531851	149.63	161	0.729666	150.022	162	0.740627	0.124456	0.154582	0.421935
COPD	Depression	183	78.98	28.8438	706.412	0.303967	0.439535	0.489211	-0.557522	1.16546	1.35522	0.572626	3.20738	-0.323024	0.723343	0.655185	-1.74078	1.09473	0.723956	0.175384	2.98837	-0.701547	0.99713	0.482665	-2.65592	1.25283	0.495818	0.0702341	3.50023	0.655073	1.05755	0.536472	-1.41773	2.72788	1.92528	0.242263	15.3004	-0.00884171	0.0242227	0.715554	154.873	169	0.774694	155.006	170	0.788703	0.303967	0.419704	0.469914
COPD	MMSE	163	78.58	28.8438	706.412	0.133929	0.212745	0.529003	-0.283051	0.550909	1.14331	0.753481	1.73483	0.171624	0.337473	0.611063	-0.489823	0.83307	1.18723	0.612735	2.30037	0.384584	0.466861	0.411285	-0.530464	1.29963	1.469	0.588332	3.66794	-0.105432	0.525975	0.841381	-1.13634	0.925478	0.899935	0.320991	2.52307	0.00596283	0.0119831	0.619443	128.006	161	0.974053	128.253	162	0.976473	0.133929	0.189294	0.48026
COPD	RBD	184	76.84	28.8438	706.412	-0.281746	0.532857	0.596982	-1.32615	0.762654	0.754465	0.265499	2.14396	-0.500192	0.860805	0.56119	-2.18737	1.18699	0.606414	0.112212	3.27719	-0.439029	1.04489	0.674855	-2.48701	1.60895	0.644662	0.0831583	4.99757	-0.188824	1.29523	0.884253	-2.72747	2.34983	0.827932	0.0653843	10.4837	-0.00227809	0.0289425	0.937349	180.07	182	0.526517	180.077	183	0.547255	-0.281746	0.528584	0.594666
COPD	MOCA	95	87.24	28.8438	706.412	0.323427	0.708984	0.648258	-1.06618	1.71304	1.38185	0.344321	5.54577	2.26803	1.73068	0.193224	-1.12409	5.66016	9.66037	0.324947	287.194	1.79459	1.10739	0.105112	-0.375894	3.96507	6.01699	0.686675	52.7238	1.31624	1.65102	0.427347	-1.91975	4.55223	3.72938	0.146644	94.8439	-0.0258063	0.0387306	0.506866	94.8273	93	0.427814	95.28	94	0.443729	0.323427	0.708984	0.64931
COPD	Constipation	187	76.85	28.8438	706.412	-0.157602	0.380342	0.678604	-0.903073	0.587869	0.85419	0.405322	1.80015	-0.41264	0.630393	0.51274	-1.64821	0.822929	0.6619	0.192394	2.27716	-0.519839	0.827935	0.530857	-2.14259	1.10291	0.594616	0.11735	3.01293	0.291345	0.932889	0.755162	-1.53712	2.11981	1.33823	0.215	8.32954	-0.0110803	0.0210238	0.598801	173.017	185	0.726446	173.295	186	0.738782	-0.157602	0.367122	0.668209
COPD	SEADL	98	87.61	28.8438	706.412	-0.378598	0.981603	0.699724	-2.30254	1.54534	0.684821	0.100005	4.68958	-2.43778	1.49075	0.101991	-5.35964	0.484083	0.0873545	0.00470258	1.62269	-3.43452	2.22877	0.126575	-7.80291	0.933878	0.032241	0.000408544	2.54436	-1.31264	2.27829	0.565861	-5.7781	3.15281	0.269108	0.0030946	23.4018	0.0234953	0.0517171	0.650635	83.5976	96	0.812764	83.804	97	0.827847	-0.378598	0.912394	0.679095
COPD	dementia	182	78.73	28.8438	706.412	0.135949	0.390366	0.727645	-0.629168	0.901065	1.14562	0.533035	2.46222	-0.0227175	0.60765	0.970177	-1.21371	1.16828	0.977539	0.297092	3.21645	-0.242175	0.892412	0.786415	-1.9913	1.50695	0.784919	0.136518	4.51296	-0.434312	0.948576	0.647608	-2.29352	1.4249	0.64771	0.10091	4.15743	0.0143095	0.0216935	0.510341	155.383	180	0.907617	155.818	181	0.912284	0.135949	0.362194	0.707842
COPD	Daytime sleep	181	73.28	28.8438	706.412	0.128023	0.386219	0.740283	-0.628966	0.885012	1.13658	0.533143	2.42301	-0.138089	0.626084	0.825436	-1.36521	1.08904	0.871021	0.255326	2.97141	-0.605928	1.37541	0.660073	-3.30174	2.08988	0.545568	0.0368191	8.08398	0.586455	0.98038	0.550468	-1.33509	2.508	1.7976	0.263134	12.2803	-0.0109935	0.021609	0.611556	154.238	179	0.909681	154.497	180	0.915878	0.128023	0.357814	0.720917
COPD	Dyskinesia	177	76.18	28.8438	516.89	-0.134308	0.51549	0.794444	-1.14467	0.876052	0.874321	0.318329	2.4014	0.433661	0.854386	0.611755	-1.24094	2.10826	1.5429	0.289114	8.23388	-0.0808349	0.993899	0.935271	-2.02888	1.86721	0.922346	0.131483	6.4702	-1.8141	1.26468	0.153235	-4.29288	0.664685	0.162985	0.0136656	1.94388	0.0416582	0.0286401	0.147588	161.379	175	0.761763	163.495	176	0.741264	-0.134308	0.496839	0.787227
COPD	Motor fluctuations	179	78.98	28.8438	706.412	-0.0786661	0.404896	0.845951	-0.872262	0.71493	0.924349	0.418005	2.04404	-0.426809	0.631324	0.499007	-1.6642	0.810586	0.652588	0.189341	2.24923	-0.0111229	0.757995	0.988309	-1.49679	1.47455	0.988939	0.223847	4.36906	0.0587422	0.946175	0.950566	-1.79576	1.91325	1.0605	0.166001	6.77505	-0.00350458	0.0218108	0.872528	165.631	177	0.719734	165.657	178	0.737086	-0.0786661	0.390605	0.840619
FEV1	HY	133	54.36	27.4376	346.338	-0.0870567	0.0463865	0.06055	-0.177974	0.00386089	0.916625	0.836964	1.00387	-0.059094	0.0712887	0.407139	-0.19882	0.0806318	0.942618	0.819698	1.08397	-0.0665538	0.134952	0.622713	-0.331059	0.197951	0.935613	0.718163	1.2189	-0.115846	0.1481	0.435501	-0.406122	0.174431	0.890612	0.666229	1.19057	0.000678225	0.00331344	0.838133	122.97	131	0.67911	123.012	132	0.700206	-0.0870567	0.0447794	0.0540075
FEV1	MMSE	127	54.67	27.4376	346.338	-0.433484	0.232659	0.062438	-0.889496	0.0225277	0.648247	0.410863	1.02278	-0.430085	0.340865	0.20704	-1.09818	0.23801	0.650454	0.333478	1.26872	-0.577322	0.648765	0.375227	-1.8489	0.694258	0.5614	0.15741	2.00222	-0.609556	0.748566	0.417023	-2.07675	0.857634	0.543592	0.125337	2.35758	0.00412741	0.0166785	0.804951	113.835	125	0.753584	113.896	126	0.772158	-0.433484	0.221202	0.0522419
FEV1	RBD	138	54.21	27.4376	346.338	1.07502	0.577679	0.0627551	-0.057235	2.20727	2.93004	0.944372	9.09082	0.733278	0.882065	0.405793	-0.995569	2.46213	2.08189	0.369513	11.7297	0.58967	1.56362	0.70667	-2.47503	3.65437	1.80339	0.0841602	38.6433	1.73141	1.85406	0.352037	-1.90255	5.36538	5.64864	0.149187	213.873	-0.0152979	0.0410596	0.710042	125.16	136	0.737256	125.298	137	0.754125	1.07502	0.552458	0.0537165
FEV1	Constipation	136	55.01	27.4376	346.338	0.834048	0.459508	0.0695102	-0.0665878	1.73468	2.30262	0.935581	5.66713	0.503865	0.685911	0.462587	-0.84052	1.84825	1.65511	0.431486	6.3487	0.206448	1.41112	0.883902	-2.55934	2.97224	1.2293	0.0773556	19.5356	-0.0292318	1.47376	0.984205	-2.91779	2.85933	0.971191	0.0540527	17.4499	0.0202441	0.0328289	0.538509	163.499	135	0.0479184	163.036	134	0.0445937	0.834048	0.459508	0.07173
FEV1	MOCA	86	56.05	28.5507	346.338	-1.11605	0.795851	0.160815	-2.67592	0.443818	0.327571	0.0688435	1.55865	-0.67511	1.17891	0.566879	-2.98578	1.63556	0.5091	0.0505001	5.13233	-0.435209	1.98749	0.827195	-4.33068	3.46026	0.647129	0.0131586	31.8254	-0.227111	2.50507	0.927978	-5.13704	4.68282	0.796832	0.00587506	108.074	-0.0211979	0.0566093	0.709005	93.3662	85	0.250636	93.2106	84	0.230503	-1.11605	0.795851	0.164457
FEV1	Insomnia	134	53.59	27.4376	346.338	-0.485599	0.365396	0.183858	-1.20177	0.230576	0.615328	0.30066	1.25933	-1.12449	0.575088	0.0505438	-2.25166	0.00268421	0.324818	0.105224	1.00269	-2.10794	1.09061	0.0553839	-4.24553	0.0296445	0.121487	0.0143281	1.03009	-1.75477	1.17327	0.137139	-4.05438	0.544843	0.172947	0.0173462	1.72434	0.0295127	0.0259259	0.257037	130.97	132	0.508981	132.265	133	0.501682	-0.485599	0.364385	0.184924
FEV1	UPDRS total	132	53.76	27.4376	346.338	-0.174542	0.133691	0.191702	-0.436577	0.0874929	0.839842	0.646245	1.09143	-0.0401154	0.199356	0.840523	-0.430854	0.350623	0.960679	0.649954	1.41995	-0.0420578	0.406581	0.91777	-0.838957	0.754842	0.958814	0.432161	2.12727	-0.0833215	0.444303	0.851535	-0.954155	0.787512	0.920055	0.385137	2.19792	-0.00210697	0.00978671	0.829879	113.313	130	0.851058	113.359	131	0.864621	-0.174542	0.124365	0.162842
FEV1	SEADL	89	57.4	28.5507	346.338	1.03368	1.02225	0.311929	-0.969928	3.03729	2.81139	0.37911	20.8486	1.44585	1.54727	0.35007	-1.5868	4.47851	4.24548	0.20458	88.103	2.28579	3.17643	0.473671	-3.94001	8.5116	9.83349	0.019448	4972.1	-0.634677	3.20639	0.843553	-6.9192	5.64984	0.530107	0.000988623	284.247	0.0394025	0.0717754	0.584432	80.4965	87	0.675443	80.7978	88	0.694208	1.03368	0.979524	0.294183
FEV1	Hyposmia	139	55.01	27.4376	346.338	0.389072	0.40511	0.336848	-0.404943	1.18309	1.47561	0.667015	3.26444	0.215698	0.606608	0.722154	-0.973253	1.40465	1.24073	0.377852	4.0741	0.791808	1.39357	0.570831	-1.93959	3.5232	2.20738	0.143764	33.8927	-2.24754	1.29394	0.0846392	-4.78366	0.28858	0.105659	0.00836536	1.33453	0.0619921	0.0289334	0.0339147	146.887	137	0.266452	151.809	138	0.199102	0.389072	0.40511	0.338527
FEV1	Depression	134	55.04	27.4376	346.338	-0.342715	0.47571	0.471261	-1.27511	0.589676	0.70984	0.279401	1.8034	0.210079	0.756809	0.781331	-1.27327	1.69343	1.23378	0.279916	5.43807	0.835079	1.15484	0.470882	-1.42841	3.09857	2.305	0.239689	22.1663	1.16413	1.51663	0.444108	-1.80846	4.13673	3.20315	0.163906	62.5978	-0.0355333	0.0339604	0.297328	133.257	132	0.452977	134.362	133	0.450615	-0.342715	0.47571	0.472525
FEV1	Daytime sleep	133	54.67	27.4376	346.338	-0.290736	0.418652	0.487395	-1.11129	0.529822	0.747713	0.329133	1.69863	0.105961	0.601527	0.860174	-1.07303	1.28495	1.11178	0.34197	3.6145	1.11491	1.34916	0.410086	-1.52945	3.75927	3.04928	0.216654	42.917	-1.57658	1.34892	0.244617	-4.22045	1.0673	0.206681	0.014692	2.90751	0.0300934	0.0300106	0.317825	105.707	131	0.948912	106.712	132	0.948114	-0.290736	0.376421	0.441276
FEV1	UPDRS IV	139	54.48	27.4376	346.338	0.104211	0.166203	0.530653	-0.221546	0.429968	1.10983	0.801279	1.53721	-0.0129345	0.239185	0.956873	-0.481737	0.455868	0.987149	0.617709	1.57754	0.136926	0.315133	0.664602	-0.480734	0.754587	1.14674	0.618329	2.12673	0.114066	0.530575	0.830098	-0.925861	1.15399	1.12083	0.39619	3.17083	-0.000233851	0.0119515	0.984417	158.303	137	0.102848	158.303	138	0.113811	0.104211	0.166203	0.531689
FEV1	Dyskinesia	134	52.42	27.4376	206.812	0.358256	0.576738	0.534483	-0.77215	1.48866	1.43083	0.462019	4.43116	0.245173	0.845509	0.771838	-1.41202	1.90237	1.27784	0.24365	6.70176	-0.53188	1.78221	0.765834	-4.02501	2.96125	0.587499	0.0178633	19.322	-1.02831	1.98753	0.605758	-4.92387	2.86725	0.357612	0.00727097	17.5887	0.0315465	0.0432739	0.467295	129.131	132	0.55439	129.662	133	0.56569	0.358256	0.569455	0.530349
FEV1	UPDRS II	133	53.17	27.4376	346.338	-0.100622	0.173125	0.561098	-0.439946	0.238702	0.904275	0.644071	1.2696	-0.0263666	0.2626	0.920022	-0.541062	0.488328	0.973978	0.58213	1.62959	-0.133022	0.398727	0.739199	-0.914527	0.648484	0.875446	0.400706	1.91264	0.351642	0.573834	0.541075	-0.773072	1.47636	1.4214	0.461593	4.37697	-0.0105277	0.0127352	0.409931	121.057	131	0.72209	121.741	132	0.728155	-0.100622	0.166261	0.546081
FEV1	UPDRS I	129	54.79	27.4376	346.338	-0.0842623	0.168468	0.616957	-0.41446	0.245935	0.91919	0.660697	1.27882	-0.267391	0.259871	0.303509	-0.776738	0.241956	0.765374	0.459904	1.27374	-0.689273	0.431913	0.112986	-1.53582	0.157276	0.501941	0.215278	1.17032	0.449989	0.532687	0.399837	-0.594077	1.49406	1.56829	0.552072	4.45513	-0.0127892	0.0120972	0.292427	112.067	127	0.824894	113.185	128	0.82179	-0.0842623	0.158419	0.59572
FEV1	dementia	136	54.41	27.4376	346.338	-0.196712	0.42879	0.646405	-1.03714	0.643716	0.821427	0.354467	1.90354	-0.239263	0.679818	0.724874	-1.57171	1.09318	0.787208	0.20769	2.98375	-0.111583	1.28864	0.931126	-2.63732	2.41415	0.894417	0.0715528	11.1803	0.96369	1.36974	0.482928	-1.72099	3.64837	2.62135	0.178889	38.4121	-0.0271686	0.0304579	0.373989	115.526	134	0.873633	116.322	135	0.875497	-0.196712	0.398023	0.621951
FEV1	HY3	136	53.75	27.4376	346.338	-0.19582	0.610665	0.748463	-1.39272	1.00108	0.82216	0.248398	2.72123	-1.05483	0.914725	0.24884	-2.84769	0.738027	0.34825	0.0579778	2.0918	-1.20702	1.63398	0.461373	-4.40963	1.99559	0.299087	0.0121597	7.35654	-0.782445	1.96329	0.690868	-4.63049	3.0656	0.457287	0.00975002	21.4472	0.0135624	0.0431228	0.753626	136.77	135	0.441254	136.669	134	0.419709	-0.19582	0.610665	0.748959
FEV1	Motor fluctuations	136	54.37	27.4376	346.338	0.101347	0.448827	0.821354	-0.778355	0.981048	1.10666	0.459161	2.66725	0.586138	0.679346	0.388249	-0.74538	1.91766	1.79704	0.474554	6.805	0.825281	1.15004	0.474239	-1.42881	3.07937	2.28252	0.239595	21.7446	-0.307157	1.41676	0.828692	-3.08401	2.4697	0.735535	0.0457753	11.8189	0.00955777	0.0314407	0.761604	103.165	134	0.977764	103.257	135	0.980617	0.101347	0.39253	0.796655
FEV1	UPDRS III	126	52.6	27.4376	346.338	0.0292267	0.144073	0.839244	-0.253156	0.311609	1.02966	0.776347	1.36562	-0.0413406	0.218466	0.849911	-0.469533	0.386852	0.959502	0.625294	1.47234	0.187791	0.392666	0.63331	-0.581834	0.957416	1.20658	0.558872	2.60496	-0.428353	0.502581	0.395688	-1.41341	0.556706	0.651582	0.243312	1.74492	0.0104642	0.0110109	0.343786	98.5157	124	0.955579	99.4188	125	0.955502	0.0292267	0.128488	0.820432
FEV1	Restless leg	93	57.76	28.5507	346.338	-0.0965281	0.775003	0.900878	-1.61553	1.42248	0.907984	0.198785	4.14738	0.812827	1.10224	0.460859	-1.34756	2.97321	2.25427	0.259874	19.5547	1.40772	2.27485	0.537566	-3.05099	5.86642	4.08662	0.0473121	352.985	1.0101	2.46861	0.683369	-3.82836	5.84857	2.74589	0.0217452	346.739	-0.0259983	0.0550377	0.637791	101.763	91	0.206865	102.013	92	0.223122	-0.0965281	0.775003	0.90115
FEV1/FVC	HY3	176	78.03	26.0953	768.755	-1.01521	0.432717	0.0189695	-1.86334	-0.167085	0.362326	0.155154	0.846128	-0.735849	0.725835	0.31068	-2.15849	0.686788	0.479098	0.1155	1.98732	-0.756619	0.813739	0.353753	-2.35155	0.838311	0.46925	0.0952217	2.31246	-0.619603	0.905941	0.494927	-2.39525	1.15604	0.538158	0.0911502	3.17733	-0.0129975	0.0261495	0.619785	163.491	174	0.705109	163.738	175	0.718887	-1.01521	0.418562	0.163046
FEV1/FVC	UPDRS III	171	79.48	27.506	768.755	-0.214608	0.0989721	0.0301309	-0.408593	-0.0206224	0.806858	0.664585	0.979589	-0.223468	0.162773	0.169791	-0.542504	0.095568	0.799741	0.581291	1.10028	-0.243249	0.175718	0.168076	-0.587656	0.101158	0.784076	0.555628	1.10645	-0.160929	0.205402	0.43444	-0.563518	0.24166	0.851352	0.569203	1.27336	-0.00185618	0.00621874	0.765702	180.55	169	0.257675	180.645	170	0.273701	-0.214608	0.0989721	0.0315208
FEV1/FVC	HY	175	78.23	26.0953	768.755	-0.0524567	0.032426	0.10572	-0.116012	0.0110982	0.948895	0.890465	1.01116	-0.0726505	0.054454	0.182151	-0.17938	0.0340794	0.929926	0.835788	1.03467	-0.120359	0.0610114	0.0501097	-0.239942	-0.000777094	0.886602	0.786674	0.999223	-0.183025	0.0691947	0.00891918	-0.318647	-0.0474038	0.832747	0.727132	0.953702	0.00433344	0.00202873	0.0340825	164.42	173	0.667542	168.982	174	0.593195	-0.0524567	0.031955	0.102484
FEV1/FVC	dementia	172	79.27	26.0953	768.755	-0.435861	0.311016	0.161091	-1.04545	0.17373	0.646708	0.351533	1.18973	-0.144365	0.509608	0.776957	-1.1432	0.854467	0.865572	0.318798	2.35012	-0.268008	0.626795	0.669492	-1.49652	0.96051	0.764902	0.223907	2.61303	-0.0170112	0.660298	0.979477	-1.3112	1.27717	0.983133	0.269498	3.58649	-0.0137885	0.0191746	0.473066	162.353	170	0.649817	162.87	171	0.659318	-0.435861	0.303532	0.152839
FEV1/FVC	UPDRS II	171	79.62	26.0953	768.755	-0.145568	0.119226	0.222109	-0.379252	0.0881154	0.864531	0.684373	1.09211	-0.237926	0.200996	0.236517	-0.631878	0.156026	0.788261	0.531593	1.16886	-0.139359	0.171676	0.418067	-0.475843	0.197126	0.869916	0.621361	1.2179	-0.141434	0.23861	0.554145	-0.60911	0.326241	0.868112	0.543835	1.38575	-0.000148603	0.0074301	0.984067	161.724	169	0.642517	161.724	170	0.662757	-0.145568	0.116288	0.212366
FEV1/FVC	Insomnia	171	78.77	26.0953	768.755	-0.28909	0.258528	0.263473	-0.795804	0.217624	0.748944	0.451218	1.24312	0.0399973	0.431328	0.926118	-0.805406	0.8854	1.04081	0.446907	2.42395	0.0380392	0.485034	0.937582	-0.912628	0.988706	1.03877	0.401468	2.68776	-0.486692	0.538991	0.367828	-1.54312	0.569731	0.614656	0.213714	1.76779	0.0066203	0.0158452	0.676615	156.973	169	0.736926	157.147	170	0.751436	-0.28909	0.248563	0.24644
FEV1/FVC	UPDRS total	174	78.87	26.0953	768.755	-0.0805659	0.092216	0.382301	-0.261309	0.100177	0.922594	0.770043	1.10537	-0.00117841	0.145998	0.99356	-0.287334	0.284977	0.998822	0.750261	1.32973	0.00212569	0.142845	0.988144	-0.277851	0.282102	1.00213	0.75741	1.32591	-0.0559246	0.190592	0.76955	-0.429485	0.317636	0.94561	0.650844	1.37388	-0.000843527	0.00570987	0.882728	132.669	172	0.988435	132.69	173	0.989995	-0.0805659	0.0807613	0.319876
FEV1/FVC	SEADL	94	85.78	28.2095	768.755	0.626087	0.790354	0.428267	-0.923006	2.17518	1.87028	0.397323	8.80377	0.263331	1.23787	0.831538	-2.1629	2.68956	1.30126	0.114992	14.7252	0.287764	1.67573	0.864027	-2.99666	3.57219	1.33344	0.0499536	35.5944	1.72794	1.62024	0.289	-1.44772	4.90361	5.62906	0.235105	134.775	-0.0364282	0.046761	0.437962	63.667	92	0.98933	64.2739	93	0.989909	0.626087	0.657048	0.343122
FEV1/FVC	Hyposmia	169	79.34	26.0953	768.755	0.219174	0.285863	0.443255	-0.341118	0.779465	1.24505	0.710975	2.18031	0.38177	0.484273	0.430501	-0.567406	1.33095	1.46487	0.566994	3.78462	0.718031	0.598434	0.231887	-0.4549	1.89096	2.05039	0.634511	6.62574	1.29852	0.60666	0.0337706	0.109465	2.48757	3.66386	1.11568	12.032	-0.035865	0.0177801	0.0452828	162.911	167	0.574967	166.98	168	0.507728	0.219174	0.284994	0.442945
FEV1/FVC	MMSE	169	79.44	26.0953	768.755	-0.103269	0.162195	0.524324	-0.421172	0.214634	0.901884	0.656277	1.23941	-0.117984	0.272923	0.665526	-0.652914	0.416946	0.88871	0.520527	1.51732	-0.248713	0.30166	0.410836	-0.839967	0.342542	0.779804	0.431725	1.40852	-0.642453	0.344495	0.0639485	-1.31766	0.0327578	0.526	0.26776	1.0333	0.0178899	0.0100841	0.0778727	147.073	167	0.864365	150.221	168	0.833911	-0.103269	0.153373	0.501669
FEV1/FVC	Depression	174	78.33	26.0953	768.755	0.199875	0.353894	0.572218	-0.493757	0.893507	1.22125	0.610329	2.44368	0.262976	0.599528	0.660923	-0.912099	1.43805	1.3008	0.40168	4.21248	0.195244	0.624788	0.755039	-1.02934	1.41983	1.21561	0.357242	4.13642	-0.11384	0.741192	0.878113	-1.56658	1.3389	0.892401	0.208759	3.81483	0.01049	0.0217622	0.630398	183.949	172	0.252811	184.198	173	0.265941	0.199875	0.353894	0.57295
FEV1/FVC	UPDRS IV	169	79.09	26.0953	768.755	0.0474682	0.110563	0.66768	-0.169234	0.264171	1.04861	0.844311	1.30235	-0.0556924	0.179487	0.756343	-0.407487	0.296102	0.94583	0.66532	1.34461	-0.00165131	0.166323	0.99209	-0.327644	0.324341	0.99835	0.72062	1.38312	0.0642825	0.216052	0.766429	-0.359179	0.487744	1.06639	0.698249	1.62864	-0.000618684	0.00682986	0.927931	153.051	167	0.773021	153.06	168	0.789274	0.0474682	0.105532	0.653435
FEV1/FVC	Constipation	174	78.81	26.0953	768.755	0.125731	0.302135	0.677306	-0.466453	0.717915	1.13398	0.627223	2.05015	0.180808	0.476805	0.704534	-0.75373	1.11535	1.19819	0.470608	3.05063	0.0698739	0.543041	0.897767	-0.994486	1.13423	1.07237	0.369913	3.10879	0.157231	0.64382	0.807355	-1.10466	1.41912	1.17027	0.331325	4.13347	-0.00103995	0.0187694	0.955879	158.242	172	0.766181	158.245	173	0.782556	0.125731	0.288963	0.664024
FEV1/FVC	Dyskinesia	176	76.4	26.0953	768.755	0.170149	0.427603	0.690694	-0.667953	1.00825	1.18548	0.512757	2.7408	0.280745	0.705837	0.690816	-1.10269	1.66419	1.32412	0.331975	5.28137	0.837756	0.668376	0.211725	-0.472261	2.14777	2.31117	0.623591	8.56576	1.05154	0.887313	0.237602	-0.687597	2.79067	2.86204	0.502783	16.2919	-0.029246	0.0258046	0.258621	192.418	174	0.161112	193.838	175	0.156666	0.170149	0.427603	0.691179
FEV1/FVC	MOCA	98	87.76	28.2095	768.755	0.20349	0.609679	0.738556	-0.99148	1.39846	1.22567	0.371027	4.04896	-0.98231	1.16009	0.399217	-3.25608	1.29146	0.374445	0.038539	3.63811	-0.477618	0.919036	0.603277	-2.27893	1.32369	0.620259	0.102394	3.75727	-0.320376	1.20727	0.791291	-2.68662	2.04587	0.725876	0.0681106	7.73589	0.0182972	0.0363463	0.615827	123.336	96	0.0315386	123.661	97	0.0352	0.20349	0.609679	0.739276
FEV1/FVC	RBD	175	77.44	26.0953	768.755	-0.116172	0.420686	0.782433	-0.940716	0.708371	0.890322	0.390348	2.03068	-0.20934	0.679068	0.757873	-1.54031	1.12163	0.811119	0.214314	3.06986	0.0977951	0.707796	0.890267	-1.28949	1.48508	1.10274	0.275412	4.4153	0.213486	0.888867	0.810477	-1.52869	1.95567	1.23799	0.216819	7.06862	-0.0110029	0.0261165	0.674058	176.586	173	0.410112	176.767	174	0.427298	-0.116172	0.420686	0.78276
FEV1/FVC	Daytime sleep	170	77.8	26.0953	768.755	0.0813774	0.304948	0.789579	-0.51632	0.679075	1.08478	0.596712	1.97205	0.130597	0.730826	0.858389	-1.30182	1.56302	1.13951	0.272036	4.7732	0.141298	0.510651	0.782009	-0.859577	1.14217	1.15177	0.423341	3.13357	0.276673	0.664535	0.677692	-1.02582	1.57916	1.31873	0.358504	4.85088	-0.00639968	0.0193344	0.741058	178.355	168	0.277624	178.472	169	0.29392	0.0813774	0.304948	0.789905
FEV1/FVC	UPDRS I	171	76.38	27.506	768.755	0.0194253	0.132194	0.883175	-0.239675	0.278526	1.01962	0.786883	1.32118	-0.0537537	0.205091	0.793247	-0.455732	0.348224	0.947666	0.633984	1.41655	-0.0953247	0.200972	0.635882	-0.48923	0.298581	0.909078	0.613098	1.34794	-0.176849	0.277411	0.524663	-0.720573	0.366876	0.837907	0.486473	1.44322	0.00660966	0.00821059	0.421941	199.639	169	0.0535865	200.404	170	0.0553137	0.0194253	0.132194	0.883349
FEV1/FVC	Motor fluctuations	178	77.98	26.0953	768.755	0.0223292	0.321669	0.944658	-0.608141	0.6528	1.02258	0.544362	1.92091	0.199462	0.518476	0.700453	-0.816752	1.21568	1.22075	0.441865	3.37257	0.123719	0.499302	0.804589	-0.854913	1.10235	1.1317	0.42532	3.01124	0.16985	0.653462	0.795227	-1.11094	1.45064	1.18513	0.329251	4.26582	-0.00501631	0.0193418	0.795668	174.768	176	0.512066	174.835	177	0.531898	0.0223292	0.319696	0.944396
FEV1/FVC	Restless leg	97	92.65	28.2095	768.755	-0.0204674	0.539785	0.969753	-1.07845	1.03751	0.979741	0.340124	2.82219	-0.0862661	0.809401	0.915122	-1.67269	1.50016	0.91735	0.187741	4.48241	0.0424725	0.981622	0.965578	-1.88151	1.96645	1.04339	0.15236	7.14527	-0.162813	1.06777	0.879133	-2.25564	1.93002	0.84975	0.104806	6.88964	0.00496786	0.032153	0.877538	85.2918	95	0.752071	85.3157	96	0.774303	-0.0204674	0.508862	0.968
FVC	MMSE	102	52.59	28.5472	206.434	-0.539406	0.273115	0.0482662	-1.07471	-0.00410152	0.583094	0.341396	0.995907	-0.624226	0.378837	0.0994054	-1.36675	0.118295	0.535676	0.254935	1.12558	-0.726096	0.749411	0.334916	-2.19494	0.742751	0.483794	0.111365	2.10171	-1.13663	0.871334	0.195068	-2.84444	0.571187	0.320899	0.0581666	1.77037	0.0138431	0.019174	0.471997	113.62	100	0.166224	114.212	101	0.174029	-0.539406	0.273115	0.0509957
FVC	UPDRS II	106	51.84	28.5472	206.434	0.303562	0.186731	0.104022	-0.0624318	0.669556	1.35468	0.939477	1.95337	0.220095	0.28335	0.437299	-0.33527	0.77546	1.2462	0.715145	2.17159	0.210488	0.498993	0.674014	-0.767537	1.18851	1.23428	0.464155	3.2822	0.217034	0.60657	0.721214	-0.971844	1.40591	1.24239	0.378385	4.07924	0.00199662	0.0133168	0.881108	99.9378	104	0.594455	99.9603	105	0.620688	0.303562	0.182195	0.0986667
FVC	UPDRS total	106	53.02	28.5472	206.434	-0.175597	0.149195	0.239209	-0.468019	0.116825	0.838956	0.626241	1.12392	-0.164716	0.231191	0.476176	-0.617849	0.288418	0.848135	0.539103	1.33431	-0.454997	0.568667	0.425453	-1.56958	0.65959	0.63445	0.208132	1.934	-0.00895271	0.477157	0.985066	-0.944181	0.926275	0.991087	0.388998	2.52509	-0.00389595	0.0105913	0.713736	113.98	104	0.236726	114.128	105	0.255204	-0.175597	0.149195	0.24187
FVC	Insomnia	106	52.43	28.5472	206.434	-0.453514	0.408809	0.267277	-1.25478	0.347752	0.635391	0.285139	1.41588	-0.607096	0.618304	0.326162	-1.81897	0.604779	0.544931	0.162192	1.83085	-1.56446	1.3907	0.263176	-4.29023	1.16131	0.2092	0.0137017	3.1941	-0.19323	1.30276	0.882375	-2.74664	2.36018	0.824293	0.0641428	10.5929	-0.00601711	0.0285809	0.833667	108.52	104	0.361281	108.566	105	0.3862	-0.453514	0.408809	0.269812
FVC	UPDRS III	102	52.08	28.5472	206.434	0.165568	0.153289	0.280096	-0.134879	0.466015	1.18006	0.873822	1.59363	0.366837	0.216833	0.0906857	-0.0581565	0.79183	1.44316	0.943502	2.20743	0.41598	0.386708	0.284627	-0.341968	1.17393	1.51586	0.710371	3.23467	-0.0444447	0.500011	0.929349	-1.02447	0.935576	0.956528	0.358988	2.54868	0.00482583	0.0109364	0.659974	94.1714	100	0.645441	94.3661	101	0.666475	0.165568	0.14817	0.266464
FVC	HY	102	53.01	28.5472	206.434	-0.0526656	0.0521025	0.312109	-0.154787	0.0494554	0.948697	0.856598	1.0507	0.0132984	0.0812006	0.86991	-0.145855	0.172452	1.01339	0.864283	1.18821	0.102002	0.140742	0.470287	-0.173853	0.377857	1.10739	0.84042	1.45915	-0.0438651	0.163556	0.789101	-0.364435	0.276705	0.957083	0.694589	1.31878	-0.000206753	0.00364231	0.954846	94.6804	100	0.631436	94.6837	101	0.657943	-0.0526656	0.050447	0.298988
FVC	HY3	112	52.94	28.7771	206.434	0.329204	0.361433	0.362384	-0.379204	1.03761	1.38986	0.684406	2.82247	0.250388	0.527708	0.635157	-0.783921	1.2847	1.28452	0.456612	3.61357	0.194317	1.13388	0.864242	-2.02808	2.41672	1.21448	0.131588	11.209	0.459186	1.18522	0.699188	-1.86384	2.78221	1.58279	0.155076	16.1547	-0.0029893	0.0259472	0.908491	122.888	110	0.188987	122.902	111	0.207158	0.329204	0.361433	0.364358
FVC	SEADL	110	51.57	28.5472	206.434	0.437616	0.572023	0.444252	-0.683548	1.55878	1.54901	0.504823	4.75302	0.825319	0.846711	0.329691	-0.834234	2.48487	2.28261	0.434207	11.9996	0.248886	1.54212	0.872083	-2.77366	3.27144	1.2826	0.0624328	26.3491	-2.09854	1.81942	0.251288	-5.66461	1.46752	0.122635	0.00346649	4.33848	0.058413	0.0398029	0.145131	116.333	108	0.274868	118.653	109	0.248159	0.437616	0.572023	0.445905
FVC	Hyposmia	105	52.75	28.5472	206.434	-0.289953	0.442188	0.512002	-1.15664	0.576735	0.748298	0.314541	1.78022	-0.014586	0.686517	0.983049	-1.36016	1.33099	0.98552	0.25662	3.78478	-0.0158694	1.46455	0.991375	-2.88639	2.85465	0.984256	0.0557771	17.3684	-0.629738	1.45959	0.667044	-3.49053	2.23106	0.532731	0.0304846	9.30971	0.00779437	0.0319083	0.807504	94.2947	103	0.718267	94.3544	104	0.740232	-0.289953	0.421184	0.492718
FVC	UPDRS IV	139	53.02	28.5472	206.434	0.104211	0.166203	0.530653	-0.221546	0.429968	1.10983	0.801279	1.53721	-0.164716	0.231191	0.476176	-0.617849	0.288418	0.848135	0.539103	1.33431	-0.454997	0.568667	0.425453	-1.56958	0.65959	0.63445	0.208132	1.934	-0.00895271	0.477157	0.985066	-0.944181	0.926275	0.991087	0.388998	2.52509	-0.00389595	0.0105913	0.713736	113.98	104	0.236726	114.128	105	0.255204	-0.175597	0.149195	0.24187
FVC	dementia	107	52.56	28.5472	206.434	-0.288529	0.493231	0.558563	-1.25526	0.678204	0.749365	0.285001	1.97034	-0.447727	0.723603	0.536084	-1.86599	0.970536	0.639079	0.154743	2.63936	0.143233	1.25988	0.9097	-2.32613	2.61259	1.154	0.0976734	13.6343	-1.17272	1.59238	0.463092	-4.29378	1.94834	0.309523	0.0136532	7.017	0.0202622	0.0346848	0.560351	110.933	105	0.327168	111.293	106	0.343369	-0.288529	0.493231	0.559806
FVC	Constipation	109	52.79	28.5472	206.434	0.261237	0.500805	0.601925	-0.720341	1.24281	1.29854	0.486586	3.46535	-0.47665	0.683279	0.485432	-1.81588	0.862577	0.62086	0.162695	2.36926	-1.01906	1.62655	0.532299	-4.2071	2.16898	0.360934	0.0148895	8.74936	-1.73894	1.63051	0.288598	-4.93475	1.45686	0.175706	0.00719225	4.29247	0.0458384	0.0355717	0.20031	125.093	107	0.111563	127.035	108	0.101904	0.261237	0.500805	0.602993
FVC	RBD	76	53.2	28.7771	206.434	-0.30005	0.837585	0.720169	-1.94172	1.34162	0.740781	0.143458	3.82522	-1.07287	1.256	0.392998	-3.53464	1.3889	0.342026	0.0291694	4.01042	-1.17332	2.33354	0.616573	-5.74706	3.40042	0.309337	0.00319214	29.9766	2.52442	2.76024	0.36339	-2.88565	7.9345	12.4837	0.0558185	2791.95	-0.0644418	0.0600069	0.286354	73.3921	74	0.498099	74.5454	75	0.493099	-0.30005	0.835042	0.720363
FVC	Restless leg	70	55.52	28.7771	206.434	0.363543	1.10809	0.74285	-1.80831	2.53539	1.43842	0.163931	12.6214	0.370702	1.72396	0.829745	-3.00826	3.74967	1.44875	0.0493774	42.507	-2.17843	3.18559	0.496367	-8.42219	4.06532	0.113219	0.000219934	58.2837	2.68595	3.35527	0.4262	-3.89039	9.26228	14.6721	0.0204374	10533.1	-0.0554841	0.0756627	0.46589	66.158	68	0.540645	66.6958	69	0.556233	0.363543	1.08943	0.739617
FVC	Dyskinesia	107	52.78	28.5472	206.434	-0.186813	0.61012	0.759459	-1.38265	1.00902	0.829598	0.250913	2.74292	-0.309263	0.919216	0.736537	-2.11093	1.4924	0.733988	0.121126	4.44776	-0.603787	1.66686	0.717901	-3.87083	2.66326	0.546737	0.020841	14.3429	-1.68128	1.97277	0.396018	-5.54791	2.18534	0.186135	0.00389559	8.89372	0.0342318	0.0429722	0.427479	83.8075	105	0.936677	84.4421	106	0.939218	-0.186813	0.544555	0.732235
FVC	MOCA	81	53.74	28.7771	206.434	-0.18267	0.774923	0.813645	-1.70152	1.33618	0.833043	0.182406	3.80448	-0.0862649	1.22777	0.943986	-2.49269	2.32016	0.917351	0.0826869	10.1773	0.639475	2.09037	0.760464	-3.45765	4.7366	1.89549	0.0315037	114.046	0.251782	2.39104	0.916403	-4.43466	4.93823	1.28631	0.0118591	139.523	-0.010234	0.053265	0.84813	79.4735	79	0.46389	79.5106	80	0.494417	-0.18267	0.772549	0.813688
FVC	Motor fluctuations	111	52.8	28.7771	206.434	-0.0804741	0.477141	0.866065	-1.01567	0.854722	0.922679	0.36216	2.35072	0.428756	0.743778	0.564306	-1.02905	1.88656	1.53535	0.357347	6.59664	1.27352	1.35308	0.348666	-1.37852	3.92556	3.5734	0.251951	50.6813	0.517665	1.55006	0.739048	-2.52046	3.55579	1.6781	0.0804228	35.0154	-0.0137167	0.0338204	0.685851	90.3734	109	0.902461	90.5379	110	0.911968	-0.0804741	0.432878	0.852862
FVC	Depression	109	52.28	28.5472	206.434	-0.0606038	0.519517	0.907134	-1.07886	0.957649	0.941196	0.339984	2.60556	-0.138928	0.793921	0.861088	-1.69501	1.41716	0.870291	0.183597	4.12538	-0.575378	1.40777	0.683558	-3.33461	2.18386	0.562492	0.0356284	8.88048	1.10164	1.64597	0.504748	-2.12447	4.32776	3.00911	0.119497	75.774	-0.0270069	0.0362837	0.458311	107.458	107	0.469387	108.014	108	0.481524	-0.0606038	0.519517	0.907351
FVC	UPDRS I	102	53.07	28.5472	206.434	0.0146383	0.184678	0.936823	-0.347331	0.376608	1.01475	0.706572	1.45733	-0.150556	0.282995	0.594719	-0.705225	0.404113	0.86023	0.493997	1.49797	-0.875765	0.497025	0.0810925	-1.84993	0.098404	0.416543	0.157247	1.10341	-0.176868	0.569968	0.756969	-1.29401	0.940269	0.83789	0.27417	2.56067	0.00456229	0.0128393	0.723085	104.026	100	0.37148	104.157	101	0.394864	0.0146383	0.184678	0.936979
FVC	Daytime sleep	110	52.46	28.5472	206.434	0.0345453	0.463443	0.94058	-0.873803	0.942893	1.03515	0.417361	2.5674	-0.192492	0.697278	0.7825	-1.55916	1.17417	0.824901	0.210313	3.23546	-1.6395	1.67272	0.329187	-4.91803	1.63903	0.194077	0.00731354	5.15015	-0.762038	1.48556	0.609025	-3.67374	2.14966	0.466714	0.0253814	8.58196	0.0251343	0.0337526	0.458035	100.054	112	0.783332	100.608	113	0.791521	0.0345453	0.463443	0.940717
IPF	MMSE	6	135.01	36.8453	594.555	-0.234988	0.0923762	0.0109651	-0.416045	-0.0539302	0.790581	0.659651	0.947498	-0.191733	0.0981256	0.050707	-0.384059	0.000593557	0.825528	0.681091	1.00059	-0.167686	0.108845	0.184046	-0.381023	0.0456505	0.845619	0.683162	1.04671	-0.0895021	0.132156	0.535396	-0.348527	0.169523	0.914386	0.705727	1.18474	-0.0610143	0.0396351	0.198543	0.11129	4	0.998508	2.48104	5	0.779348	-0.234988	0.0650717	0.0153609
IPF	MOCA	7	124.29	36.8453	594.555	-0.61869	0.253057	0.0144908	-1.11468	-0.122698	0.53865	0.32802	0.884531	-0.698295	0.288933	0.0156571	-1.2646	-0.131988	0.497433	0.282351	0.876352	-0.751865	0.300698	0.0465032	-1.34123	-0.162497	0.471486	0.261523	0.850019	-0.721708	0.408619	0.137617	-1.5226	0.0791847	0.485922	0.218144	1.0824	0.0376707	0.110829	0.747746	5.98179	5	0.307995	6.12001	6	0.409882	-0.61869	0.253057	0.0501394
IPF	UPDRS IV	7	124.29	36.8453	594.555	0.135551	0.0598917	0.0236188	0.0181636	0.252939	1.14517	1.01833	1.2878	0.116248	0.0690541	0.092292	-0.0190983	0.251594	1.12327	0.981083	1.28607	0.115095	0.070472	0.153544	-0.0230297	0.253221	1.12198	0.977234	1.28817	0.131114	0.0944184	0.22362	-0.0539457	0.316174	1.1401	0.947484	1.37187	0.00144095	0.023311	0.953106	5.24487	5	0.386733	5.24888	6	0.512312	0.135551	0.0560175	0.0518772
IPF	dementia	7	124.29	36.8453	594.555	0.291566	0.158459	0.0457665	-0.0190132	0.602144	1.33852	0.981166	1.82603	0.26685	0.178284	0.134453	-0.0825866	0.616286	1.30584	0.920732	1.85204	0.259765	0.193612	0.216536	-0.119715	0.639245	1.29663	0.887173	1.89505	0.37721	0.228235	0.142366	-0.07013	0.82455	1.45821	0.932273	2.28086	-0.0490147	0.0608708	0.447174	5.86611	7	0.555468	6.51449	8	0.589801	0.241917	0.139392	0.120865
IPF	Insomnia	7	124.29	36.8453	594.555	-0.25874	0.219298	0.238059	-0.688565	0.171085	0.772024	0.502296	1.18659	0.121141	0.151378	0.423563	-0.17556	0.417841	1.12878	0.838987	1.51868	0.138745	0.15339	0.400576	-0.161899	0.43939	1.14883	0.850527	1.55176	0.131368	0.201783	0.543756	-0.264128	0.526863	1.14039	0.767875	1.69361	-0.0117255	0.0558356	0.841956	5.37465	5	0.371887	5.42205	6	0.490927	0.100429	0.126422	0.457228
IPF	HY3	7	124.29	36.8453	594.555	0.0203332	0.0174929	0.245085	-0.0139528	0.0546192	1.02054	0.986144	1.05614	0.0420526	0.251092	0.866993	-0.450087	0.534192	1.04295	0.637573	1.70607	0.0367697	0.238985	0.882766	-0.431641	0.50518	1.03745	0.649442	1.65728	0.0795257	0.468673	0.871911	-0.839074	0.998125	1.08277	0.432111	2.71319	0.00208462	0.129973	0.987824	10.2644	5	0.0680811	10.2649	6	0.11393	0.0850227	0.291825	0.780595
IPF	HY	7	124.29	36.8453	594.555	-0.186766	0.193384	0.334156	-0.5658	0.192267	0.829638	0.567906	1.21199	0.00194817	0.0196681	0.921097	-0.0366014	0.0404977	1.00195	0.96406	1.04133	0.00179316	0.0224909	0.939046	-0.0422889	0.0458753	1.00179	0.958593	1.04694	-0.0116895	0.025984	0.671634	-0.0626181	0.039239	0.988379	0.939302	1.04002	0.0118563	0.00711378	0.156458	2.57562	5	0.765066	5.35338	6	0.499351	0.0203332	0.0165234	0.264534
IPF	Depression	7	124.29	36.8453	594.555	0.191184	0.207703	0.357329	-0.215915	0.598282	1.21068	0.805804	1.81899	0.00112373	0.226402	0.99604	-0.442624	0.444871	1.00112	0.642349	1.56029	0.0080811	0.214715	0.971199	-0.412761	0.428923	1.00811	0.66182	1.5356	-0.140058	0.287045	0.646242	-0.702667	0.422551	0.869308	0.495263	1.52585	0.110427	0.0718731	0.185036	4.8466	5	0.434886	7.20719	6	0.302111	0.191184	0.207703	0.392833
IPF	Constipation	7	124.29	36.8453	594.555	0.19222	0.212329	0.365311	-0.223945	0.608384	1.21194	0.799359	1.83746	0.187542	0.185165	0.311138	-0.175382	0.550466	1.20628	0.839137	1.73406	0.147354	0.189204	0.465689	-0.223486	0.518194	1.15876	0.799726	1.67899	0.0399638	0.327761	0.907704	-0.602448	0.682375	1.04077	0.54747	1.97857	0.0573866	0.090279	0.55295	9.64845	5	0.0858315	10.4282	6	0.107741	0.19222	0.212329	0.400201
IPF	UPDRS II	6	138.85	39.452	594.555	-0.0505978	0.065503	0.439848	-0.178984	0.0777881	0.950661	0.83612	1.08089	-0.0703822	0.070201	0.316063	-0.207976	0.0672117	0.932038	0.812226	1.06952	-0.0718613	0.0745627	0.379425	-0.218004	0.0742816	0.93066	0.804122	1.07711	-0.0806374	0.097162	0.453239	-0.271075	0.1098	0.922528	0.762559	1.11605	0.0111166	0.0265567	0.697008	0.752776	4	0.944665	0.928001	5	0.968161	-0.0505978	0.0282196	0.13295
IPF	Hyposmia	6	135.01	36.8453	594.555	0.100429	0.13299	0.450151	-0.160231	0.361088	1.10564	0.851947	1.43489	-0.118756	0.167258	0.477695	-0.446583	0.209071	0.888024	0.639811	1.23253	-0.100676	0.169604	0.578618	-0.4331	0.231748	0.904226	0.648496	1.2608	-0.0608575	0.292479	0.845336	-0.634117	0.512402	0.940957	0.530404	1.6693	-0.0547243	0.0898784	0.575494	7.38613	4	0.116836	8.07069	5	0.152383	-0.186766	0.193384	0.378512
IPF	UPDRS III	5	157.93	39.452	594.555	-0.0275915	0.0534072	0.605418	-0.13227	0.0770867	0.972786	0.876105	1.08014	-0.0349432	0.0576086	0.544142	-0.147856	0.0779698	0.96566	0.862555	1.08109	-0.0374491	0.065314	0.597089	-0.165465	0.0905663	0.963243	0.8475	1.09479	-0.0476982	0.0776856	0.582644	-0.199962	0.104566	0.953422	0.818762	1.11023	0.00783947	0.0219961	0.745131	1.45477	3	0.692748	1.58179	4	0.81206	-0.0275915	0.033585	0.457482
IPF	UPDRS I	7	124.29	36.8453	594.555	-0.028927	0.0633792	0.648094	-0.15315	0.0952962	0.971487	0.858001	1.09998	-0.0133671	0.0702378	0.849065	-0.151033	0.124299	0.986722	0.859819	1.13235	-0.00181376	0.0713669	0.980548	-0.141693	0.138065	0.998188	0.867888	1.14805	0.00925144	0.103109	0.931989	-0.192842	0.211345	1.00929	0.824612	1.23534	-0.0129582	0.0263638	0.643876	5.9346	5	0.312635	6.22135	6	0.398857	-0.028927	0.0633792	0.66415
IPF	Dyskinesia	7	124.29	36.8453	594.555	-0.0766185	0.207004	0.711285	-0.482346	0.329109	0.926243	0.617333	1.38973	-0.114331	0.226897	0.61434	-0.55905	0.330388	0.891963	0.571752	1.39151	-0.107297	0.228316	0.654987	-0.554796	0.340203	0.898259	0.574189	1.40523	0.0425582	0.307258	0.895243	-0.559667	0.644783	1.04348	0.571399	1.90557	-0.042424	0.0808281	0.622107	4.06408	5	0.540227	4.33957	6	0.630826	-0.0766185	0.176046	0.678623
IPF	SEADL	6	45.9	36.8453	59.8872	0.245387	0.668684	0.713641	-1.06523	1.55601	1.27812	0.344648	4.73985	0.422488	0.811614	0.602678	-1.16828	2.01325	1.52575	0.310903	7.48762	0.622685	0.985378	0.555198	-1.30866	2.55403	1.86393	0.270183	12.8588	0.102647	2.86218	0.97311	-5.50722	5.71251	1.1081	0.00405738	302.631	0.022224	0.433299	0.961553	1.36342	4	0.850527	1.36605	5	0.927991	0.245387	0.349517	0.513961
IPF	Motor fluctuations	7	124.29	36.8453	594.555	0.0509162	0.168118	0.761997	-0.278596	0.380428	1.05223	0.756846	1.46291	0.083755	0.189596	0.658667	-0.287854	0.455364	1.08736	0.749871	1.57675	0.0723974	0.182988	0.706055	-0.286259	0.431054	1.07508	0.751068	1.53888	0.144165	0.258306	0.600831	-0.362114	0.650444	1.15507	0.696203	1.91639	-0.0323391	0.0666341	0.647965	5.27264	5	0.38352	5.52102	6	0.478919	0.0509162	0.161269	0.762907
IPF	RBD	7	124.29	36.8453	594.555	0.0850227	0.291825	0.770785	-0.486955	0.657	1.08874	0.614495	1.929	-0.245591	0.242636	0.311453	-0.721158	0.229976	0.782242	0.486189	1.25857	-0.256621	0.244904	0.335074	-0.736632	0.22339	0.773661	0.478724	1.25031	-0.352609	0.320592	0.321504	-0.980969	0.275752	0.702852	0.374948	1.31752	0.0353226	0.0879985	0.704706	3.88958	5	0.565421	4.0507	6	0.669815	-0.25874	0.180188	0.201034
IPF	Restless leg	7	124.29	36.8453	594.555	0.0744804	0.312935	0.811876	-0.538871	0.687832	1.07732	0.583406	1.9894	-0.10035	0.359896	0.780375	-0.805746	0.605047	0.904521	0.446754	1.83134	-0.148405	0.379721	0.709425	-0.892659	0.595848	0.862082	0.409565	1.81457	0.164157	0.510701	0.760883	-0.836816	1.16513	1.1784	0.433087	3.20634	-0.0263404	0.116348	0.829859	5.30557	5	0.379737	5.35995	6	0.498542	0.0744804	0.295773	0.809587
IPF	Daytime sleep	5	155.17	36.8453	594.555	0.0381606	0.162232	0.814036	-0.279815	0.356136	1.0389	0.755924	1.4278	0.00675375	0.172178	0.968711	-0.330714	0.344222	1.00678	0.71841	1.41089	0.0348459	0.184204	0.85917	-0.326194	0.395886	1.03546	0.721665	1.4857	0.00630099	0.233388	0.980157	-0.451139	0.463741	1.00632	0.636902	1.59001	0.0144516	0.0761062	0.861519	2.96846	3	0.396514	3.00451	4	0.557071	0.0381606	0.140603	0.799509
IPF	UPDRS total	7	124.29	36.8453	594.555	-0.000723092	0.0501103	0.988487	-0.0989393	0.0974931	0.999277	0.905798	1.1024	-0.0124181	0.0566969	0.82663	-0.123544	0.0987078	0.987659	0.883783	1.10374	-0.010203	0.0592208	0.868876	-0.126276	0.10587	0.989849	0.881372	1.11168	-0.00533894	0.0753947	0.946292	-0.153113	0.142435	0.994675	0.858033	1.15308	0.0016276	0.0198634	0.937874	3.19286	5	0.67028	3.19957	6	0.783414	-0.000723092	0.0365929	0.984875
OSA	UPDRS IV	17	47.03	33.6784	102.432	-0.802512	0.297556	0.0069965	-1.38572	-0.219302	0.448201	0.250143	0.803079	-0.992363	0.421947	0.0186793	-1.81938	-0.165348	0.3707	0.162126	0.847599	-1.17654	0.52918	0.0409484	-2.21373	-0.139347	0.308344	0.109292	0.869927	-1.04557	1.47793	0.490131	-3.9423	1.85117	0.351493	0.0194034	6.36728	0.00718917	0.0427613	0.868732	16.3263	15	0.360704	16.3571	16	0.428331	-0.802512	0.297556	0.0158688
OSA	Hyposmia	17	47.03	33.7211	102.432	2.10741	0.823049	0.0104525	0.494232	3.72058	8.22689	1.63924	41.2885	2.39705	1.10737	0.0304154	0.22661	4.56749	10.9907	1.25434	96.3024	2.7668	1.54446	0.0921565	-0.260346	5.79395	15.9077	0.770785	328.309	3.55139	3.6475	0.345671	-3.59771	10.7005	34.8616	0.0273864	44377.3	-0.0426522	0.104886	0.690006	15.3994	15	0.42305	15.5691	16	0.483414	2.10741	0.811891	0.0195114
OSA	dementia	16	47.86	33.7211	102.432	2.15146	0.971644	0.0268119	0.247036	4.05588	8.59738	1.28023	57.7359	1.77067	1.26815	0.162633	-0.714893	4.25624	5.8748	0.489244	70.5441	2.02666	1.60127	0.224944	-1.11184	5.16515	7.58867	0.328953	175.064	4.14749	4.32671	0.354034	-4.33286	12.6278	63.2748	0.01313	304928	-0.0593435	0.125169	0.642733	16.4732	14	0.285337	16.7377	15	0.334785	2.15146	0.971644	0.0427172
OSA	UPDRS I	16	46.29	33.6784	102.432	-0.82526	0.385378	0.0322394	-1.5806	-0.0699188	0.438121	0.205851	0.932469	-0.886762	0.495173	0.0733232	-1.8573	0.0837766	0.411987	0.156093	1.08739	-1.85793	0.882388	0.0525015	-3.58742	-0.128453	0.155994	0.0276697	0.879455	-1.60099	1.82052	0.394021	-5.1692	1.96722	0.201697	0.00568909	7.15081	0.0230761	0.0528579	0.669082	20.9225	14	0.103636	21.2073	15	0.130336	-0.82526	0.385378	0.049065
OSA	Constipation	13	44.71	33.7211	102.432	-1.95199	1.13987	0.0868106	-4.18614	0.282155	0.141991	0.0152049	1.32598	-2.105	1.44013	0.143832	-4.92767	0.717662	0.121845	0.00724339	2.04964	-3.02407	2.12441	0.180073	-7.18792	1.13978	0.0486031	0.00075566	3.1261	-2.92412	4.74278	0.550084	-12.22	6.37172	0.0537121	4.93106e-06	585.065	0.0286023	0.135095	0.836197	13.9853	11	0.233809	14.0423	12	0.298018	-1.95199	1.13987	0.112506
OSA	MMSE	15	47.09	33.6784	102.432	-0.766827	0.497349	0.123115	-1.74163	0.207977	0.464484	0.175234	1.23119	1.01682	1.36435	0.468429	-1.6573	3.69094	2.7644	0.190654	40.0826	-0.475095	0.707966	0.502176	-1.86271	0.912519	0.621826	0.155252	2.49059	2.55129	2.26452	0.280264	-1.88717	6.98975	12.8236	0.1515	1085.45	-0.0967177	0.0644249	0.157186	12.0044	13	0.527283	14.2581	14	0.430662	-0.766827	0.497349	0.145411
OSA	Motor fluctuations	15	42.64	33.6784	66.3062	-1.52672	1.01646	0.1331	-3.51898	0.465552	0.217248	0.0296296	1.59289	-1.74749	1.41242	0.215999	-4.51583	1.02084	0.17421	0.0109345	2.77553	-1.2974	1.7845	0.479186	-4.79502	2.20022	0.273242	0.00827086	9.02704	5.62469	5.37916	0.314779	-4.91846	16.1678	277.187	0.0073104	1.051e+07	-0.19569	0.144543	0.198851	10.9264	13	0.616983	12.7593	14	0.545556	-1.52672	0.970379	0.137966
OSA	UPDRS III	16	47.7	33.6784	102.432	-0.355621	0.277445	0.199923	-0.899413	0.188172	0.700738	0.406808	1.20704	-0.176433	0.381146	0.643435	-0.923479	0.570613	0.838255	0.397135	1.76935	-0.21424	0.463652	0.650661	-1.123	0.694517	0.807154	0.325303	2.00274	-0.616328	1.23936	0.6267	-3.04548	1.81282	0.539923	0.0475737	6.1277	0.00772486	0.0357908	0.83223	12.6225	14	0.55644	12.6691	15	0.627841	-0.355621	0.254979	0.183416
OSA	UPDRS II	15	48.6	33.6784	102.432	-0.473184	0.4091	0.247417	-1.27502	0.328651	0.623015	0.279425	1.38909	-1.4327	0.520427	0.00590648	-2.45274	-0.412662	0.238664	0.0860577	0.661886	-1.5661	0.646894	0.0296534	-2.83401	-0.298189	0.208858	0.0587766	0.742161	-0.569094	2.06314	0.787008	-4.61285	3.47466	0.566038	0.00992347	32.287	0.00286695	0.060352	0.962834	21.1798	13	0.0694482	21.1834	14	0.097023	-0.473184	0.4091	0.266772
OSA	UPDRS total	16	45.83	33.6784	102.432	-0.309385	0.274254	0.259279	-0.846924	0.228153	0.733898	0.428732	1.25628	-0.504975	0.396883	0.203248	-1.28287	0.272915	0.60352	0.277242	1.31379	-0.871819	0.5664	0.144575	-1.98196	0.238325	0.41819	0.137799	1.26912	1.53679	1.19004	0.217487	-0.795684	3.86927	4.64965	0.451273	47.9073	-0.054389	0.0341152	0.133195	11.7448	14	0.62679	14.2865	15	0.503921	-0.309385	0.267652	0.265792
OSA	Daytime sleep	16	45.83	33.6784	102.432	-0.915799	0.911378	0.314969	-2.7021	0.870502	0.400197	0.0670645	2.38811	-0.307554	1.25082	0.805774	-2.75917	2.14406	0.735243	0.0633445	8.53402	1.85334	2.01748	0.372818	-2.10091	5.80759	6.38111	0.122345	332.817	4.91463	3.81581	0.218641	-2.56436	12.3936	136.269	0.0769681	241258	-0.172362	0.10954	0.137923	12.1636	14	0.593167	14.6395	15	0.477682	-0.915799	0.90036	0.325209
OSA	MOCA	12	47.96	33.6784	102.432	1.30047	1.47681	0.378539	-1.59408	4.19501	3.67101	0.203095	66.3545	0.610324	1.96738	0.756392	-3.24573	4.46638	1.84103	0.03894	87.0411	-0.585373	2.64316	0.828786	-5.76597	4.59522	0.556898	0.00313235	99.0104	3.24721	6.86437	0.646332	-10.2069	16.7014	25.7185	3.69129e-05	1.7919e+07	-0.0570364	0.196405	0.777442	5.2084	10	0.876829	5.29273	11	0.916165	1.30047	1.0244	0.230465
OSA	Insomnia	14	47.36	33.7211	102.432	-0.704455	0.82637	0.393953	-2.32414	0.915229	0.494378	0.0978676	2.49735	-0.416643	1.18191	0.724451	-2.73319	1.8999	0.659256	0.0650118	6.68522	0.554896	2.07267	0.793115	-3.50754	4.61733	1.74176	0.0299706	101.224	0.83738	3.55304	0.817655	-6.12658	7.80134	2.31031	0.00218404	2443.87	-0.0461626	0.103461	0.663409	11.5033	12	0.48635	11.7024	13	0.552189	-0.704455	0.784042	0.385263
OSA	Dyskinesia	16	47.82	33.7211	102.432	-0.957346	1.13562	0.399219	-3.18316	1.26847	0.38391	0.0414544	3.5554	-0.252994	1.54571	0.869987	-3.28259	2.7766	0.776473	0.037531	16.0643	-0.00072694	2.18966	0.999739	-4.29247	4.29101	0.999273	0.0136712	73.0404	-3.50626	5.31794	0.520385	-13.9294	6.9169	0.030009	8.92346e-07	1009.19	0.0755873	0.154064	0.631295	13.5209	14	0.485981	13.7616	15	0.543683	-0.957346	1.08773	0.392671
OSA	Depression	16	45.83	33.7211	102.432	0.756545	1.0178	0.457294	-1.23835	2.75144	2.1309	0.289861	15.6652	0.373053	1.31418	0.776512	-2.20274	2.94885	1.45216	0.1105	19.084	-0.495712	1.91947	0.799721	-4.25787	3.26645	0.609137	0.0141523	26.2181	-2.59066	4.42265	0.567353	-11.259	6.07773	0.0749704	1.28901e-05	436.036	0.0974331	0.125282	0.449685	8.12817	14	0.882542	8.733	15	0.891059	0.756545	0.776606	0.345422
OSA	RBD	16	47.71	33.6784	102.432	-0.621383	1.23521	0.614924	-3.0424	1.79963	0.537201	0.0477204	6.04742	0.384013	1.72814	0.824149	-3.00314	3.77116	1.46817	0.0496312	43.4305	1.99015	2.52898	0.443575	-2.96665	6.94695	7.31661	0.0514753	1039.97	-8.22838	5.60145	0.16395	-19.2072	2.75046	0.000266968	4.55415e-09	15.6499	0.225867	0.162224	0.185549	8.94054	14	0.834841	10.8791	15	0.761118	-0.621383	1.05194	0.563516
OSA	HY3	16	45.83	33.6784	102.432	-0.764731	1.84778	0.678973	-4.38637	2.85691	0.465459	0.0124458	17.4077	0.637156	1.91917	0.739892	-3.12441	4.39872	1.8911	0.043963	81.3467	2.45902	2.80094	0.393828	-3.03082	7.94887	11.6934	0.0482758	2832.38	15.8502	6.80309	0.0352921	2.51609	29.1842	7.64952e+06	12.3801	4.72654e+12	-0.487316	0.194023	0.0249001	20.5265	14	0.114397	29.7756	15	0.0127569	-0.764731	1.84778	0.684829
OSA	SEADL	13	49.37	33.6784	102.432	0.827487	2.2329	0.710944	-3.549	5.20397	2.28756	0.0287535	181.993	0.110076	2.8992	0.969714	-5.57236	5.79251	1.11636	0.00380151	327.834	-1.85731	3.90079	0.642528	-9.50285	5.78824	0.156092	7.46386e-05	326.437	9.16562	10.8838	0.417646	-12.1666	30.4979	9562.62	5.20121e-06	1.75812e+13	-0.242577	0.309675	0.449971	13.3423	11	0.271545	14.0865	12	0.295217	0.827487	2.2329	0.717403
OSA	HY	14	46.02	33.7211	102.432	0.0295509	0.123959	0.811576	-0.213408	0.27251	1.02999	0.807826	1.31326	0.153101	0.151731	0.31296	-0.144292	0.450494	1.16544	0.865635	1.56909	0.150703	0.204904	0.475109	-0.25091	0.552315	1.16265	0.778092	1.73727	0.493569	0.504309	0.347047	-0.494878	1.48201	1.63815	0.609646	4.4018	-0.0140635	0.0148121	0.361117	16.6505	12	0.163224	17.9013	13	0.161302	0.0295509	0.123959	0.815293
OSA	Restless leg	13	49.37	33.6784	102.432	-0.336012	1.47122	0.819343	-3.2196	2.54758	0.714615	0.0399711	12.7761	0.0916628	2.1661	0.966246	-4.15389	4.33722	1.096	0.0157032	76.4945	3.84565	3.53763	0.298359	-3.08811	10.7794	46.7891	0.0455882	48021.7	-0.996074	7.2073	0.892577	-15.1224	13.1302	0.369327	2.70663e-07	503956	0.0191619	0.204731	0.927113	11.2349	11	0.423795	11.2439	12	0.508141	-0.336012	1.42411	0.817455
PEF	Insomnia	115	59.19	28.3672	253.14	-0.906658	0.377347	0.0162737	-1.64626	-0.167058	0.403872	0.19277	0.84615	-0.725749	0.5727	0.205069	-1.84824	0.396743	0.483962	0.157514	1.48697	-0.257082	1.10775	0.816895	-2.42826	1.9141	0.773305	0.0881897	6.78084	-0.726207	1.30417	0.578741	-3.28238	1.82996	0.48374	0.037539	6.23364	-0.00435362	0.030119	0.885326	90.8609	113	0.937787	90.8818	114	0.945627	-0.906658	0.33692	0.00819521
PEF	SEADL	72	63.93	28.9063	253.14	2.23636	1.07591	0.0376558	0.127584	4.34514	9.35923	1.13608	77.1029	1.27851	1.57642	0.417356	-1.81128	4.3683	3.59127	0.163444	78.9092	0.711091	2.91476	0.807964	-5.00184	6.42402	2.03621	0.00672557	616.477	0.178971	3.49385	0.959292	-6.66898	7.02692	1.19599	0.0012697	1126.55	0.0506937	0.0819042	0.537966	59.3975	70	0.812908	59.7806	71	0.826261	2.23636	0.987247	0.12655
PEF	dementia	115	58.03	28.3672	253.14	-0.806689	0.45664	0.0772994	-1.7017	0.0883255	0.446334	0.182373	1.09234	-0.588023	0.662907	0.375059	-1.88732	0.711275	0.555424	0.151477	2.03659	-0.666813	1.26179	0.598202	-3.13991	1.80629	0.513342	0.0432865	6.08781	-0.236062	1.58586	0.881934	-3.34435	2.87223	0.789732	0.035283	17.6764	-0.0136011	0.0361987	0.707819	103.578	113	0.725874	103.719	114	0.744722	-0.806689	0.435563	0.0666044
PEF	UPDRS IV	113	60.66	28.3672	253.14	0.224685	0.174613	0.198177	-0.117556	0.566926	1.25193	0.889091	1.76284	0.0235765	0.258296	0.927272	-0.482683	0.529836	1.02386	0.617125	1.69865	-0.128363	0.377071	0.734178	-0.867422	0.610697	0.879534	0.420033	1.84171	-0.108814	0.616912	0.860313	-1.31796	1.10033	0.896897	0.26768	3.00517	0.0082014	0.0145468	0.574032	120.595	111	0.25119	120.94	112	0.265516	0.224685	0.174613	0.20083
PEF	RBD	117	60.43	28.3672	253.14	0.734748	0.599603	0.220427	-0.440473	1.90997	2.08496	0.643732	6.75288	1.28009	0.927267	0.167433	-0.53735	3.09754	3.59697	0.584294	22.1433	1.36466	1.55092	0.380733	-1.67515	4.40447	3.91439	0.187279	81.8159	-0.179426	2.02998	0.929722	-4.15819	3.79934	0.835749	0.0156358	44.6716	0.0223375	0.0473888	0.638271	99.722	115	0.844074	99.9442	116	0.856061	0.734749	0.556562	0.189382
PEF	MMSE	112	57.72	28.9063	253.14	-0.282459	0.243205	0.245479	-0.75914	0.194223	0.753928	0.468069	1.21437	-0.287761	0.368938	0.435407	-1.01088	0.435356	0.749941	0.363899	1.54551	-0.564298	0.765858	0.462787	-2.06538	0.936784	0.568759	0.12677	2.55176	1.42076	0.879588	0.109119	-0.303228	3.14476	4.14028	0.738431	23.214	-0.0404485	0.0200743	0.0463499	104.488	110	0.630381	108.548	111	0.548137	-0.282459	0.240504	0.24273
PEF	HY3	121	60.59	28.3672	253.14	-0.709368	0.622395	0.254395	-1.92926	0.510526	0.491955	0.145255	1.66617	-0.424608	0.925806	0.646496	-2.23919	1.38997	0.654026	0.106545	4.01474	-0.440272	1.36371	0.747371	-3.11314	2.23259	0.643861	0.0444612	9.32402	-0.575176	2.08324	0.782953	-4.65833	3.50798	0.562606	0.00948225	33.3808	-0.00328582	0.0486608	0.946277	123.757	119	0.36413	123.762	120	0.388479	-0.709368	0.622395	0.256665
PEF	UPDRS II	112	59.24	28.3672	253.14	0.111699	0.180258	0.535482	-0.241607	0.465005	1.11818	0.785365	1.59202	-0.211898	0.28089	0.450619	-0.762442	0.338645	0.809047	0.466526	1.40305	-0.149861	0.404327	0.71161	-0.942342	0.64262	0.860828	0.389714	1.90146	-1.26182	0.6339	0.0490095	-2.50426	-0.0193714	0.283139	0.081736	0.980815	0.033152	0.0146686	0.0257859	95.3075	111	0.855899	95.3075	111	0.855899	0.111699	0.167031	0.505055
PEF	Hyposmia	120	59.08	28.3672	253.14	0.240305	0.410962	0.558725	-0.565182	1.04579	1.27164	0.568257	2.84565	0.59961	0.618722	0.33249	-0.613086	1.81231	1.82141	0.541677	6.12455	2.42996	1.24008	0.0523903	-0.000598103	4.86053	11.3585	0.999402	129.092	1.78309	1.38533	0.200571	-0.932159	4.49834	5.94822	0.393703	89.8682	-0.0377287	0.0323578	0.245972	122.395	118	0.372249	123.805	119	0.362992	0.240305	0.410963	0.559832
PEF	UPDRS III	114	58.66	28.3672	253.14	-0.0808252	0.14609	0.580087	-0.367161	0.205511	0.922355	0.692698	1.22815	-0.0329332	0.221938	0.882035	-0.467931	0.402065	0.967603	0.626297	1.49491	0.164168	0.389034	0.673836	-0.598338	0.926674	1.17841	0.549724	2.52609	-0.241014	0.520743	0.644386	-1.26167	0.779642	0.78583	0.283181	2.18069	0.00383808	0.0119758	0.749196	79.647	112	0.991063	79.7497	113	0.992456	-0.0808252	0.122728	0.511512
PEF	Motor fluctuations	118	60.69	28.3672	253.14	-0.255205	0.502201	0.611332	-1.23952	0.729109	0.774758	0.289523	2.07323	0.137155	0.732834	0.851537	-1.2992	1.57351	1.14701	0.27275	4.82355	0.160544	0.941333	0.864873	-1.68447	2.00556	1.17415	0.185543	7.43023	1.6549	1.68061	0.326819	-1.63909	4.9489	5.23257	0.194157	141.019	-0.0466224	0.0391533	0.236177	133.814	116	0.12348	135.449	117	0.116827	-0.255205	0.502201	0.612289
PEF	UPDRS total	114	58.1	28.3672	237.627	0.0683633	0.137898	0.62007	-0.201917	0.338644	1.07075	0.817162	1.40304	0.238378	0.212848	0.262736	-0.178803	0.655559	1.26919	0.836271	1.92622	0.217638	0.358927	0.545493	-0.485858	0.921135	1.24314	0.615169	2.51214	-0.461276	0.470481	0.328984	-1.38342	0.460866	0.630478	0.25072	1.58545	0.0129077	0.0109624	0.241511	96.0515	112	0.858978	97.4379	113	0.8513	0.0683633	0.128051	0.594477
PEF	Dyskinesia	115	57.57	28.3672	237.627	-0.293276	0.594918	0.622035	-1.45932	0.872764	0.745816	0.232395	2.39352	-0.198313	0.941338	0.833144	-2.04334	1.64671	0.820113	0.129596	5.18987	0.0859519	1.71157	0.960036	-3.26872	3.44063	1.08975	0.0380549	31.2066	2.08787	2.13429	0.33004	-2.09534	6.27108	8.06771	0.123029	529.047	-0.0565815	0.0487056	0.247803	108.152	113	0.611289	109.502	114	0.601643	-0.293276	0.583063	0.61594
PEF	HY	112	59.04	28.3672	253.14	-0.0221301	0.0491886	0.652781	-0.11854	0.0742796	0.978113	0.888216	1.07711	-0.016388	0.0746112	0.826147	-0.162626	0.12985	0.983746	0.849909	1.13866	-0.0361679	0.132941	0.786081	-0.296732	0.224396	0.964478	0.743244	1.25157	-0.00532616	0.166838	0.97459	-0.332328	0.321676	0.994688	0.717252	1.37944	-0.000405336	0.0038455	0.916246	106.485	110	0.577093	106.496	111	0.603165	-0.0221301	0.0481804	0.646905
PEF	UPDRS I	109	58.53	28.3672	253.14	-0.0750714	0.18505	0.684976	-0.437768	0.287626	0.927677	0.645475	1.33326	0.0278364	0.284628	0.922092	-0.530035	0.585708	1.02823	0.588584	1.79626	0.354614	0.488814	0.469741	-0.603462	1.31269	1.42563	0.546915	3.71615	-0.517414	0.656402	0.432289	-1.80396	0.769134	0.59606	0.164645	2.1579	0.0105831	0.0150676	0.483968	106.746	107	0.488752	107.239	108	0.502592	-0.0750714	0.184396	0.684726
PEF	Daytime sleep	114	60.6	28.3672	253.14	-0.161022	0.430818	0.708583	-1.00543	0.683381	0.851273	0.365889	1.98056	0.307842	0.62531	0.622505	-0.917765	1.53345	1.36049	0.399411	4.63413	1.14474	1.63389	0.484977	-2.05768	4.34716	3.14164	0.12775	77.2591	-1.1818	1.43689	0.412558	-3.99811	1.63451	0.306726	0.0183503	5.12696	0.0251343	0.0337526	0.458035	100.054	112	0.783332	100.608	113	0.791521	-0.161022	0.406511	0.692772
PEF	MOCA	71	62.45	28.9063	253.14	-0.293978	0.88763	0.740498	-2.03373	1.44578	0.745293	0.130846	4.24515	-0.476856	1.17759	0.685519	-2.78492	1.83121	0.620732	0.0617337	6.24145	-1.08574	2.5633	0.673178	-6.1098	3.93833	0.337653	0.00222099	51.3327	0.0231872	3.1083	0.99407	-6.06908	6.11545	1.02346	0.00231331	452.8	-0.00770018	0.0722753	0.915463	87.8086	69	0.0629203	87.8231	70	0.0735402	-0.293978	0.88763	0.741487
PEF	Constipation	114	60.76	28.3672	253.14	0.0907135	0.439319	0.836411	-0.770351	0.951778	1.09496	0.46285	2.59031	0.596039	0.681795	0.381998	-0.740279	1.93236	1.81492	0.476981	6.90576	0.900478	1.29179	0.487185	-1.63143	3.43238	2.46078	0.19565	30.9503	2.40812	1.48556	0.107826	-0.503581	5.31983	11.1131	0.604363	204.348	-0.057138	0.0349897	0.105279	88.834	112	0.94784	91.5006	113	0.931536	0.0907135	0.395323	0.818921
PEF	Restless leg	72	64.78	28.9063	253.14	-0.103796	0.786232	0.894971	-1.64481	1.43722	0.901409	0.193049	4.20897	-0.952825	1.14827	0.406658	-3.20344	1.29779	0.38565	0.0406222	3.6612	-0.849736	2.43395	0.728034	-5.62028	3.92081	0.427528	0.00362361	50.4414	-5.09999	2.64702	0.0580783	-10.2881	0.0881663	0.00609683	3.40344e-05	1.09217	0.122125	0.0617827	0.0520175	58.9621	70	0.823768	62.8694	71	0.74335	-0.103796	0.739846	0.888825
PEF	Depression	114	61.4	28.3672	253.14	0.0236294	0.516079	0.963481	-0.987886	1.03514	1.02391	0.372363	2.81551	0.435171	0.771873	0.5729	-1.0777	1.94804	1.54523	0.340377	7.01494	0.821159	1.17057	0.484431	-1.47316	3.11548	2.27313	0.229201	22.5441	0.0248338	1.73081	0.988578	-3.36756	3.41722	1.02514	0.0344738	30.4847	-2.97452e-05	0.0407838	0.999419	120.99	112	0.26448	120.99	113	0.286522	0.0236294	0.516079	0.963561
[truncated: 5 more columns]

## Sheet: Table S4
Table S4. Genetic correlation using HDL and LDSC between PD and respiratory GWAS
respiratory_gwas	hdl_rg	hdl_se	hdl_p	ldsc_rg	ldsc_se	ldsc_p
asthma	0.0822	0.0399	0.0395	0.100547	0.0355781	0.00471188
COPD	0.0008	0.0015	0.591	-0.0123614	0.0319029	0.698409
FEV1	0.0005	0.0088	0.754	0.0482655	0.0357773	0.17732
FEV1/FVC	-0.0266	0.0238	0.263	-0.0128288	0.0282544	0.649795
FVC	0.0013	0.0017	0.443	0.0501636	0.035982	0.163278
IPF	-0.0013	0.0007	NA	-0.098549	0.0828564	0.234285
OSA	-0.0023	0.0014	0.0955	-0.0516734	0.0386998	0.181798
PEF	-9.07e-05	0.0012	0.941	0.0245339	0.0346753	0.479234

## Sheet: Table S5
Table S5. PD-RD pleiotropic genes from PLACO with FUMA analysis
Trait pair	ensg	symbol	entrezID	Chromosome	start	end	strand	type	pLI	ncRVIS	posMapSNPs	posMapMaxCADD	IndSigSNPs
PD-COPD	ENSG00000220581	VN1R12P	NA	6	27001214	27002089	-1	pseudogene	NA	NA	1	0.714	rs469228
PD-COPD	ENSG00000216762	VN1R13P	NA	6	27028144	27029028	-1	pseudogene	NA	NA	2	7.229	rs469228
PD-COPD	ENSG00000219770	VN1R11P	NA	6	27051059	27051926	1	pseudogene	NA	NA	1	8.294	rs469228
PD-COPD	ENSG00000222800	RNU2-62P	NA	6	27077569	27077759	-1	snRNA	NA	NA	2	1.574	rs469228
PD-COPD	ENSG00000124635	HIST1H2BJ	8970	6	27093676	27100541	-1	protein_coding	0.478842	0.308582	1	6.12	rs469228
PD-COPD	ENSG00000196787	HIST1H2AG	85235	6	27100832	27103070	1	protein_coding	0.000610464	-0.741637	1	6.12	rs469228
PD-COPD	ENSG00000197903	HIST1H2BK	85236	6	27106073	27114619	-1	protein_coding	0.490754	-0.0430523	3	7.498	rs469228
PD-COPD	ENSG00000198339	HIST1H4I	554313	6	27107076	27108418	1	protein_coding	0.446296	-0.468005	2	7.498	rs469228
PD-COPD	ENSG00000184825	HIST1H2AH	85235	6	27114861	27115317	1	protein_coding	6.29508e-05	0.19492	3	7.498	rs469228
PD-COPD	ENSG00000265565	MIR3143	100422934	6	27115405	27115467	1	miRNA	NA	NA	3	7.498	rs469228
PD-COPD	ENSG00000174572	RP11-209A2.1	NA	6	27179023	27179692	1	pseudogene	NA	NA	1	0.098	rs469228
PD-COPD	ENSG00000112812	PRSS16	10279	6	27215480	27224403	1	protein_coding	2.23792e-06	0.00884812	2	5.654	rs469228
PD-COPD	ENSG00000270935	XXbac-BPGBPG24O18.1	NA	6	27235892	27237008	1	pseudogene	NA	NA	6	7.652	rs469228
PD-COPD	ENSG00000158553	POM121L2	94026	6	27253682	27279949	-1	protein_coding	NA	0.313408	6	5.115	rs469228
PD-COPD	ENSG00000220758	VN1R10P	387316	6	27292578	27293742	1	pseudogene	NA	NA	3	1.159	rs469228
PD-COPD	ENSG00000204789	ZNF204P	7754	6	27325604	27339304	-1	pseudogene	NA	NA	1	1.696	rs469228
PD-COPD	ENSG00000124613	ZNF391	346157	6	27342394	27371683	1	protein_coding	9.25869e-07	1.23172	8	10.65	rs469228
PD-COPD	ENSG00000271755	RP1-153G14.4	NA	6	27371789	27374743	-1	lincRNA	NA	NA	4	4.666	rs469228
PD-COPD	ENSG00000237154	MCFD2P1	NA	6	27375476	27375775	1	pseudogene	NA	NA	4	4.666	rs469228
PD-COPD	ENSG00000270666	XXbac-BPGBPG34I8.1	NA	6	27482818	27483053	-1	pseudogene	NA	NA	1	3.566	rs469228
PD-COPD	ENSG00000219738	XXbac-BPG34I8.3	NA	6	27528601	27529523	-1	pseudogene	NA	NA	2	6.833	rs469228
PD-COPD	ENSG00000206671	RNU6-471P	NA	6	27564191	27564296	1	snRNA	NA	NA	3	3.459	rs469228
PD-COPD	ENSG00000216676	RP1-15D7.1	NA	6	27620381	27620604	-1	pseudogene	NA	NA	3	6.313	rs469228
PD-COPD	ENSG00000218069	RSL24D1P1	NA	6	27748398	27748890	-1	pseudogene	NA	NA	1	2.233	rs469228
PD-COPD	ENSG00000203813	HIST1H3H	8968	6	27777842	27778314	1	protein_coding	0.0249392	-0.177817	1	1.835	rs469228
PD-COPD	ENSG00000182611	HIST1H2AJ	8331	6	27782112	27782607	-1	protein_coding	0.191198	0.615054	1	1.835	rs469228
PD-COPD	ENSG00000196374	HIST1H2BM	8342	6	27782822	27783267	1	protein_coding	0.00275346	-0.27562	1	1.835	rs469228
PD-COPD	ENSG00000197238	HIST1H4J	554313	6	27791884	27792257	1	protein_coding	0.423754	0.59845	2	1.835	rs469228
PD-COPD	ENSG00000197914	HIST1H4K	554313	6	27798952	27799305	-1	protein_coding	0.429119	0.387416	2	13.61	rs469228
PD-COPD	ENSG00000184348	HIST1H2AK	85235	6	27805658	27806117	-1	protein_coding	0.0684285	-0.0412441	1	13.61	rs469228
PD-COPD	ENSG00000233822	HIST1H2BN	8341	6	27806323	27823487	1	protein_coding	0.139775	0.145508	3	13.61	rs469228
PD-COPD	ENSG00000217646	HIST1H2BPS2	NA	6	27831840	27832179	-1	pseudogene	NA	NA	1	3.205	rs469228
PD-COPD	ENSG00000198374	HIST1H2AL	85235	6	27833034	27833606	1	protein_coding	0.0624869	-0.360341	1	3.205	rs469228
PD-COPD	ENSG00000184357	HIST1H1B	3009	6	27834570	27835359	-1	protein_coding	0.509139	-0.0898951	1	3.205	rs469228
PD-COPD	ENSG00000182572	HIST1H3I	8968	6	27839623	27840099	-1	protein_coding	0.36088	-0.232438	1	1.523	rs469228
PD-COPD	ENSG00000198558	HIST1H4L	554313	6	27840926	27841289	-1	protein_coding	0.191235	0.42689	1	1.523	rs469228
PD-COPD	ENSG00000197153	HIST1H3J	8968	6	27858093	27860884	-1	protein_coding	0.695884	-0.189708	3	2.225	rs469228
PD-COPD	ENSG00000233224	HIST1H2AM	85235	6	27860477	27860963	-1	protein_coding	0.000856482	-0.225135	2	2.225	rs469228
PD-COPD	ENSG00000196331	HIST1H2BO	8348	6	27861203	27861669	1	protein_coding	3.07278e-05	-0.223063	2	2.225	rs469228
PD-COPD	ENSG00000238610	RNU7-26P	NA	6	27865282	27865344	-1	snRNA	NA	NA	1	1.492	rs469228
PD-COPD	ENSG00000168131	OR2B2	81697	6	27878963	27880174	-1	protein_coding	6.8672e-05	-0.212076	4	8.487	rs469228
PD-COPD	ENSG00000168126	OR2W6P	NA	6	27905243	27906181	1	pseudogene	NA	NA	4	3.809	rs469228
PD-COPD	ENSG00000124657	OR2B6	26212	6	27925019	27925960	1	protein_coding	0.0407309	-0.0981731	4	5.737	rs469228
PD-COPD	ENSG00000214374	RPLP2P1	NA	6	27932953	27933292	1	pseudogene	NA	NA	3	5.737	rs469228
PD-COPD	ENSG00000216629	OR2W4P	NA	6	27944928	27945853	1	pseudogene	NA	NA	1	5.737	rs469228
PD-COPD	ENSG00000217539	IQCB2P	NA	6	27978501	27980133	1	pseudogene	NA	NA	1	11.43	rs469228
PD-COPD	ENSG00000199851	U3	NA	6	27983346	27983553	1	snoRNA	NA	NA	1	11.43	rs469228
PD-COPD	ENSG00000217315	OR2W2P	NA	6	28001725	28002633	1	pseudogene	NA	NA	3	8.316	rs469228
PD-COPD	ENSG00000220721	OR1F12	NA	6	28041094	28042011	1	pseudogene	NA	NA	2	0.541	rs469228
PD-COPD	ENSG00000272009	RP1-313I6.12	NA	6	28046570	28048908	-1	antisense	NA	NA	4	18.27	rs469228
PD-COPD	ENSG00000197279	ZNF165	7718	6	28048753	28057341	1	protein_coding	0.000563292	0.227981	5	18.27	rs469228
PD-COPD	ENSG00000219891	ZSCAN12P1	221584	6	28058932	28061442	1	pseudogene	NA	NA	3	18.27	rs469228
PD-COPD	ENSG00000269293	ZSCAN16-AS1	100129195	6	28089573	28105071	-1	antisense	NA	NA	2	3.445	rs469228
PD-COPD	ENSG00000196812	ZSCAN16	80345	6	28092338	28097860	1	protein_coding	2.67303e-06	0.184187	1	3.445	rs469228
PD-COPD	ENSG00000261839	RP1-265C24.8	NA	6	28104627	28107456	1	lincRNA	NA	NA	3	3.5	rs469228
PD-COPD	ENSG00000198315	ZKSCAN8	7745	6	28109688	28127250	1	protein_coding	0.000231595	-0.142528	7	9.296	rs469228
PD-COPD	ENSG00000226314	ZNF192P1	651302	6	28129559	28137372	1	pseudogene	NA	NA	5	9.296	rs469228
PD-COPD	ENSG00000216901	AL022393.7	NA	6	28143966	28144452	1	pseudogene	NA	NA	1	3.421	rs469228
PD-COPD	ENSG00000218016	ZNF192P2	NA	6	28155828	28157210	1	pseudogene	NA	NA	4	12.53	rs469228
PD-COPD	ENSG00000176933	TOB2P1	222699	6	28185421	28186655	-1	pseudogene	NA	NA	1	6.015	rs469228
PD-COPD	ENSG00000137185	ZSCAN9	7746	6	28192664	28201260	1	protein_coding	4.10249e-08	0.461166	1	6.015	rs469228
PD-COPD	ENSG00000187626	ZKSCAN4	387032	6	28212401	28227011	-1	protein_coding	6.74288e-05	0.661631	5	11.12	rs469228
PD-COPD	ENSG00000189134	NKAPL	222698	6	28227098	28228736	1	protein_coding	0.000165621	0.0513426	3	5.373	rs469228
PD-COPD	ENSG00000197062	RP5-874C20.3	NA	6	28234788	28245974	1	pseudogene	NA	NA	1	0.816	rs469228
PD-COPD	ENSG00000270326	RP5-874C20.6	NA	6	28287437	28287629	-1	pseudogene	NA	NA	2	1.44	rs469228
PD-COPD	ENSG00000235109	ZSCAN31	64288	6	28292470	28324048	-1	protein_coding	3.77127e-09	1.10713	2	1.44	rs469228
PD-COPD	ENSG00000158691	ZSCAN12	9753	6	28346732	28367511	-1	protein_coding	1.43992e-05	NA	2	0.919	rs469228
PD-COPD	ENSG00000251877	RNU2-45P	NA	6	28378047	28378233	1	snRNA	NA	NA	1	0.026	rs469228
PD-COPD	ENSG00000187987	ZSCAN23	222696	6	28399707	28411279	-1	protein_coding	0.00270295	0.0706565	4	2.394	rs469228
PD-COPD	ENSG00000231162	COX11P1	NA	6	28414750	28415584	1	pseudogene	NA	NA	3	2.024	rs469228
PD-COPD	ENSG00000219262	OR2E1P	NA	6	28423425	28423918	-1	pseudogene	NA	NA	3	2.024	rs469228
PD-COPD	ENSG00000198704	GPX6	257202	6	28471073	28495992	-1	protein_coding	3.13758e-05	0.718703	7	24.9	rs469228
PD-COPD	ENSG00000224586	GPX5	2880	6	28493702	28502729	1	protein_coding	0.00888468	0.354876	6	24.9	rs469228
PD-COPD	ENSG00000232040	SCAND3	114821	6	28539407	28583989	-1	protein_coding	9.70724e-09	-0.785031	2	5.243	rs469228
PD-COPD	ENSG00000246350	RP5-1186N24.3	NA	6	28555155	28559524	1	processed_transcript	NA	NA	2	5.243	rs469228
PD-COPD	ENSG00000271440	RP11-373N24.2	NA	6	28601158	28601371	-1	pseudogene	NA	NA	1	2.569	rs469228
PD-COPD	ENSG00000225173	XXbac-BPG308K3.5	NA	6	28805646	28806783	-1	lincRNA	NA	NA	2	5.062	rs469228
PD-COPD	ENSG00000233366	ZNF90P2	NA	6	28856609	28857683	-1	pseudogene	NA	NA	2	2.743	rs469228
PD-COPD	ENSG00000224157	HCG14	414760	6	28864307	28865099	1	antisense	NA	NA	1	1.845	rs469228
PD-COPD	ENSG00000204713	TRIM27	5987	6	28870779	28891766	-1	protein_coding	0.878752	-0.142068	1	1.845	rs469228
PD-COPD	ENSG00000204709	C6orf100	NA	6	28911654	28912314	1	protein_coding	NA	NA	1	0.104	rs469228
PD-COPD	ENSG00000263426	RN7SL471P	NA	6	28945252	28945547	1	misc_RNA	NA	NA	1	1.366	rs469228
PD-COPD	ENSG00000227214	HCG15	NA	6	28953980	28955261	1	antisense	NA	NA	1	1.366	rs469228
PD-COPD	ENSG00000244349	HCG16	101929874	6	28954577	28956313	1	antisense	NA	NA	1	1.366	rs469228
PD-COPD	ENSG00000197935	ZNF311	282890	6	28962562	28973093	-1	protein_coding	0.000129446	0.377858	1	1.366	rs469228
PD-COPD	ENSG00000107249	GLIS3	169792	9	3824127	4348392	-1	protein_coding	0.000100597	-0.548104	10	9.102	rs7044458
PD-COPD	ENSG00000137033	IL33	90865	9	6215805	6257983	1	protein_coding	1.05456e-08	0.958134	16	8.974	rs7850988
PD-COPD	ENSG00000170777	TPD52L3	89882	9	6328349	6331900	1	protein_coding	0.163388	-0.250331	13	9.751	rs7850988
PD-COPD	ENSG00000178445	GLDC	2731	9	6532464	6645650	-1	protein_coding	4.87945e-14	0.293403	1	0.247	rs7850988
PD-COPD	ENSG00000264530	RN7SL25P	NA	9	6542094	6542350	1	misc_RNA	NA	NA	1	0.247	rs7850988
PD-COPD	ENSG00000151465	CDC123	8872	10	12237964	12292588	1	protein_coding	0.239628	0.222689	2	0.035	rs112783459
PD-COPD	ENSG00000168003	SLC3A2	6520	11	62623518	62656352	1	protein_coding	0.923234	-0.438387	1	0.237	rs11231176
PD-COPD	ENSG00000258762	CTD-2320B12.3	NA	14	84639185	84639950	1	pseudogene	NA	NA	1	3.124	rs1698269
PD-COPD	ENSG00000258923	CTD-2320B12.1	NA	14	84640135	84641854	1	pseudogene	NA	NA	1	3.124	rs1698269
PD-COPD	ENSG00000259012	CTD-2320B12.2	NA	14	84642763	84643432	1	pseudogene	NA	NA	1	3.124	rs1698269
PD-COPD	ENSG00000149926	FAM57B	100996332	16	30035748	30064299	-1	protein_coding	0.285736	NA	1	0.315	rs13708
PD-COPD	ENSG00000149925	ALDOA	226	16	30064411	30081778	1	protein_coding	0.0248344	-1.30116	1	0.315	rs13708
PD-COPD	ENSG00000183604	RP11-347C12.2	101929906	16	30234230	30346695	-1	pseudogene	NA	NA	1	6.569	rs13708
PD-COPD	ENSG00000169217	CD2BP2	10421	16	30362087	30366682	-1	protein_coding	0.000336174	-1.35975	1	10.56	rs13708
PD-COPD	ENSG00000260219	RP11-347C12.10	NA	16	30366762	30367848	1	lincRNA	NA	NA	1	10.56	rs13708
PD-COPD	ENSG00000169221	TBC1D10B	26000	16	30368423	30381585	-1	protein_coding	0.981784	-0.103269	1	10.56	rs13708
PD-COPD	ENSG00000180209	MYLPF	29895	16	30382255	30389312	1	protein_coding	0.602001	-0.35594	1	4.931	rs13708
PD-COPD	ENSG00000180035	ZNF48	197407	16	30389427	30411429	1	protein_coding	0.0324251	NA	1	4.931	rs13708
PD-COPD	ENSG00000180096	SEPT1	1731	16	30389454	30407312	-1	protein_coding	0.00293747	NA	1	4.931	rs13708
PD-COPD	ENSG00000270466	SEPT1	NA	16	30389755	30393863	-1	protein_coding	NA	NA	1	4.931	rs13708
PD-COPD	ENSG00000260869	AC002310.13	NA	16	30545548	30569600	-1	protein_coding	NA	NA	1	3.557	rs13708
PD-COPD	ENSG00000235560	AC002310.12	NA	16	30546073	30548465	1	antisense	NA	NA	1	3.557	rs13708
PD-COPD	ENSG00000260494	AC002310.10	NA	16	30548523	30549552	-1	pseudogene	NA	NA	1	3.557	rs13708
PD-COPD	ENSG00000169951	ZNF764	92595	16	30565085	30569819	-1	protein_coding	3.06789e-08	-1.08037	1	3.557	rs13708
PD-COPD	ENSG00000229809	ZNF688	146542	16	30580667	30584055	-1	protein_coding	7.08656e-05	-0.833034	2	3.43	rs13708
PD-COPD	ENSG00000239791	AC002310.7	NA	16	30583571	30595181	1	antisense	NA	NA	2	3.43	rs13708
PD-COPD	ENSG00000197162	ZNF785	146540	16	30585061	30597092	-1	protein_coding	3.83915e-14	-0.552379	2	3.43	rs13708
PD-COPD	ENSG00000260167	RP11-146F11.5	NA	16	30597228	30619914	1	antisense	NA	NA	1	3.43	rs13708
PD-COPD	ENSG00000099381	SETD1A	9739	16	30968615	30996437	1	protein_coding	0.999996	-0.894969	1	0.089	rs13708
PD-COPD	ENSG00000099377	HSD3B7	80270	16	30996519	31000473	1	protein_coding	4.64185e-06	-0.867417	1	0.089	rs13708
PD-COPD	ENSG00000268863	AC135048.1	NA	16	30996808	30997533	-1	protein_coding	NA	NA	1	0.089	rs13708
PD-COPD	ENSG00000103507	BCKDK	10295	16	31117428	31124110	1	protein_coding	0.00580436	-0.219605	1	13.18	rs13708
PD-COPD	ENSG00000252809	AC135050.1	NA	16	31120551	31120634	1	miRNA	NA	NA	1	13.18	rs13708
PD-COPD	ENSG00000103510	KAT8	84148	16	31127075	31142714	1	protein_coding	0.912576	0.0373929	1	13.18	rs13708
PD-COPD	ENSG00000262766	RP11-196G11.4	NA	16	31129399	31130068	1	sense_intronic	NA	NA	1	13.18	rs13708
PD-COPD	ENSG00000140678	ITGAX	3687	16	31366455	31394318	1	protein_coding	6.11157e-05	0.796194	1	0.842	rs13708
PD-COPD	ENSG00000261648	CTD-2014E2.2	NA	16	31558019	31558558	-1	lincRNA	NA	NA	1	9.669	rs13708
PD-COPD	ENSG00000213547	VN1R64P	NA	16	31558126	31559058	1	pseudogene	NA	NA	1	9.669	rs13708
PD-COPD	ENSG00000261475	CTD-2014E2.6	NA	16	31560464	31564888	-1	lincRNA	NA	NA	1	9.669	rs13708
PD-COPD	ENSG00000260883	VN1R65P	NA	16	31565426	31566233	1	pseudogene	NA	NA	1	9.669	rs13708
PD-COPD	ENSG00000197302	ZNF720	101928852	16	31724550	31806190	1	protein_coding	0.0559605	2.41744	1	0.562	rs13708
PD-COPD	ENSG00000261457	AC002519.6	NA	16	31814268	31819294	1	pseudogene	NA	NA	1	1.321	rs13708
PD-COPD	ENSG00000180663	VN1R3	NA	16	31819247	31820165	-1	pseudogene	NA	NA	1	1.321	rs13708
PD-COPD	ENSG00000197476	RP11-170L3.7	NA	16	31973384	31985682	1	pseudogene	NA	NA	1	0.133	rs13708
PD-COPD	ENSG00000260628	RP11-1166P10.1	NA	16	31987124	32015049	1	pseudogene	NA	NA	1	0.133	rs13708
PD-COPD	ENSG00000108379	WNT3	101929777	17	44839872	44910520	-1	protein_coding	0.946108	-0.191111	1	7.191	rs8064870
PD-COPD	ENSG00000004897	CDC27	996	17	45195069	45266788	-1	protein_coding	0.486673	-0.787143	1	3.88	rs8064870
PD-COPD	ENSG00000221016	AC002558.1	NA	17	45195868	45195957	1	miRNA	NA	NA	1	3.88	rs8064870
PD-COPD	ENSG00000198336	MYL4	4635	17	45277812	45301045	1	protein_coding	0.000175625	-0.33374	1	0.365	rs8064870
PD-COPD	ENSG00000259207	ITGB3	3690	17	45331212	45421658	1	protein_coding	0.1417	-0.214709	27	13.22	rs4076453
PD-COPD	ENSG00000259753	ITGB3	NA	17	45331263	45421658	1	protein_coding	NA	-0.214709	27	13.22	rs4076453
PD-COPD	ENSG00000263293	RP11-290H9.4	NA	17	45380832	45400979	-1	antisense	NA	NA	16	9.802	rs4076453
PD-COPD	ENSG00000178852	EFCAB13	124989	17	45400656	45518678	1	protein_coding	8.21992e-19	-0.190445	22	36	rs4076453;rs8064870
PD-COPD	ENSG00000253347	CTD-2026D20.2	NA	17	45486688	45500892	-1	antisense	NA	NA	3	8.701	rs4076453
PD-COPD	ENSG00000228782	MRPL45P2	653479	17	45527934	45569858	-1	pseudogene	NA	NA	5	2.898	rs8064870;rs4076453
PD-COPD	ENSG00000141279	NPEPPS	9520	17	45600308	45700642	1	protein_coding	0.999906	-0.210177	45	15.72	rs4076453;rs8064870
PD-COPD	ENSG00000206734	Y_RNA	NA	17	45634779	45634880	1	misc_RNA	NA	NA	6	9.983	rs4076453
PD-COPD	ENSG00000263766	RP11-580I16.2	NA	17	45681226	45726786	-1	antisense	NA	NA	29	11.74	rs4076453;rs8064870
PD-COPD	ENSG00000108424	KPNB1	3837	17	45726842	45762871	1	protein_coding	0.999994	-0.517927	16	12.26	rs4076453
PD-COPD	ENSG00000264558	RP11-138C9.1	NA	17	45759783	45760049	-1	antisense	NA	NA	3	1.159	rs4076453
PD-COPD	ENSG00000198933	TBKBP1	9755	17	45771447	45789416	1	protein_coding	0.0383778	-1.54619	13	17.68	rs4076453
PD-COPD	ENSG00000073861	TBX21	30009	17	45810610	45823485	1	protein_coding	0.963243	0.0831505	1	18.24	rs8064870
PD-COPD	ENSG00000167182	SP2	6668	17	45973516	46006323	1	protein_coding	0.969394	-1.2623	1	18.32	rs8064870
PD-COPD	ENSG00000234494	AC003665.1	100506325	17	45974696	46018776	-1	antisense	NA	NA	1	18.32	rs8064870
PD-COPD	ENSG00000266601	RP11-6N17.3	NA	17	46007048	46010472	-1	antisense	NA	NA	1	18.32	rs8064870
PD-COPD	ENSG00000263798	RP11-6N17.9	NA	17	46022790	46051804	1	processed_transcript	NA	NA	1	0.432	rs8064870
PD-COPD	ENSG00000167183	PRR15L	79170	17	46029333	46035244	-1	protein_coding	0.481247	0.303263	1	0.432	rs8064870
PD-COPD	ENSG00000108465	CDK5RAP3	80279	17	46045176	46059140	1	protein_coding	2.86539e-12	0.440978	1	0.432	rs8064870
PD-IPF	ENSG00000251661	RP11-326C3.11	NA	11	318640	325631	1	antisense	NA	NA	1	1.579	rs55771420
PD-IPF	ENSG00000142089	IFITM3	10410	11	319669	327537	-1	protein_coding	0.199202	2.72623	1	1.579	rs55771420
PD-IPF	ENSG00000255089	RP11-326C3.10	NA	11	321991	322426	1	antisense	NA	NA	1	1.579	rs55771420
PD-IPF	ENSG00000270105	RP11-326C3.14	NA	11	322186	322727	-1	lincRNA	NA	NA	1	1.579	rs55771420
PD-IPF	ENSG00000270030	RP11-326C3.13	NA	11	325703	326294	-1	lincRNA	NA	NA	1	1.579	rs55771420
PD-IPF	ENSG00000255328	RP11-326C3.12	NA	11	327171	330122	1	lincRNA	NA	NA	1	1.579	rs55771420
PD-IPF	ENSG00000270972	RP11-326C3.15	NA	11	333192	333688	1	lincRNA	NA	NA	1	1.579	rs55771420
PD-IPF	ENSG00000184363	PKP3	11187	11	392614	404908	1	protein_coding	0.19435	-0.235047	1	0.745	rs55771420
PD-IPF	ENSG00000185187	SIGIRR	59307	11	405716	417455	-1	protein_coding	0.00530889	-0.434585	1	0.745	rs55771420
PD-IPF	ENSG00000174915	PTDSS2	81490	11	448268	491393	1	protein_coding	0.000109483	-0.195309	1	1.038	rs55771420
PD-IPF	ENSG00000023191	RNH1	6050	11	494512	507300	-1	protein_coding	0.000213432	-0.00953195	1	1.038	rs55771420
PD-IPF	ENSG00000070047	PHRF1	57661	11	576486	612222	1	protein_coding	0.948919	NA	1	4.057	rs55771420
PD-IPF	ENSG00000177030	DEAF1	101927373	11	644233	706715	-1	protein_coding	0.000193157	NA	1	0.735	rs55771420
PD-IPF	ENSG00000177106	EPS8L2	64787	11	694438	727727	1	protein_coding	0.00182701	NA	1	0.735	rs55771420
PD-IPF	ENSG00000177042	TMEM80	283232	11	695428	705028	1	protein_coding	4.91355e-05	NA	1	0.735	rs55771420
PD-IPF	ENSG00000269915	AP006621.9	NA	11	708564	727047	-1	antisense	NA	NA	1	0.735	rs55771420
PD-IPF	ENSG00000177595	PIDD	55367	11	799179	809753	-1	protein_coding	1.60116e-09	NA	1	1.546	rs55771420
PD-IPF	ENSG00000177600	RPLP2	619565	11	809647	812880	1	protein_coding	0.708518	-0.753874	1	1.546	rs55771420
PD-IPF	ENSG00000199785	SNORA52	619565	11	811681	811814	1	snoRNA	NA	NA	1	1.546	rs55771420
PD-IPF	ENSG00000177666	PNPLA2	57104	11	818902	825573	1	protein_coding	0.00114119	-0.585814	1	1.546	rs55771420
PD-IPF	ENSG00000255108	AP006621.8	NA	11	823634	832883	-1	antisense	NA	NA	1	1.546	rs55771420
PD-IPF	ENSG00000177685	EFCAB4A	283229	11	826144	831991	1	protein_coding	0.00185894	0.62083	1	1.546	rs55771420;rs189734031
PD-IPF	ENSG00000214063	TSPAN4	7106	11	842808	867116	1	protein_coding	2.52434e-06	-0.353452	1	3.565	rs55771420
PD-IPF	ENSG00000250397	RP11-1391J7.1	NA	11	856880	859795	-1	antisense	NA	NA	1	3.565	rs55771420
PD-IPF	ENSG00000177830	CHID1	66005	11	867357	915058	-1	protein_coding	0.000725517	-1.18508	2	3.565	rs55771420
PD-IPF	ENSG00000183020	AP2A2	101927462	11	924894	1012239	1	protein_coding	0.999932	0.0937053	4	11.81	rs189734031;rs55771420
PD-IPF	ENSG00000184956	MUC6	4588	11	1012821	1036706	-1	protein_coding	1.08684e-32	-0.43461	1	0.723	rs189734031
PD-IPF	ENSG00000254872	RP13-870H17.3	101927503	11	1049880	1055284	1	lincRNA	NA	NA	1	2.239	rs189734031
PD-IPF	ENSG00000215182	MUC5AC	4586	11	1151580	1222364	1	protein_coding	NA	NA	2	4.817	rs55771420
PD-IPF	ENSG00000078902	TOLLIP	54472	11	1295601	1330884	-1	protein_coding	0.522906	0.125194	1	6.787	rs55771420
PD-IPF	ENSG00000182208	MOB2	81532	11	1490687	1522477	-1	protein_coding	0.641499	0.199982	1	0.067	rs55771420
PD-IPF	ENSG00000184545	DUSP8	101927562	11	1575274	1593150	-1	protein_coding	0.684473	0.0810374	1	8.99	rs55771420
PD-IPF	ENSG00000233930	KRTAP5-AS1	338651	11	1592583	1620414	1	antisense	NA	NA	1	8.99	rs55771420
PD-IPF	ENSG00000230980	RPL36AP39	NA	11	1813783	1814100	1	pseudogene	NA	NA	1	0.827	rs55771420
PD-IPF	ENSG00000230080	AC139143.2	NA	11	1824119	1825325	-1	pseudogene	NA	NA	2	2.699	rs55771420
PD-IPF	ENSG00000125409	TEKT3	64518	17	15207128	15244958	-1	protein_coding	3.19945e-14	0.0598698	1	1.348	rs21180
PD-IPF	ENSG00000011295	TTC19	54902	17	15902694	15948329	1	protein_coding	1.0503e-10	1.1213	1	0.075	rs21180
PD-IPF	ENSG00000141027	NCOR1	9611	17	15932471	16121499	-1	protein_coding	1	-0.470619	2	3.258	rs21180
PD-IPF	ENSG00000227782	AC002553.1	NA	17	15943505	15943994	1	protein_coding	NA	NA	1	0.075	rs21180
PD-IPF	ENSG00000243686	RPLP1P11	NA	17	15947935	15948275	1	pseudogene	NA	NA	1	0.075	rs21180
PD-IPF	ENSG00000108474	PIGL	9487	17	16120505	16252115	1	protein_coding	3.55119e-05	0.213751	1	4.168	rs21180
PD-IPF	ENSG00000221355	MIR1288	100302124	17	16185328	16185402	1	miRNA	NA	NA	1	4.168	rs21180
PD-IPF	ENSG00000187688	TRPV2	51393	17	16318856	16340317	1	protein_coding	0.00562916	0.475977	1	11.45	rs21180
PD-IPF	ENSG00000175061	FAM211A-AS1	692106	17	16342136	16381992	1	processed_transcript	NA	NA	1	11.45	rs21180
PD-IPF	ENSG00000266651	RP11-138I1.3	NA	17	16343793	16344266	-1	lincRNA	NA	NA	1	11.45	rs21180
PD-IPF	ENSG00000181350	FAM211A	388341	17	16344891	16395467	-1	protein_coding	0.732182	NA	1	11.45	rs21180
PD-IPF	ENSG00000272815	RP11-219A15.4	NA	17	16691371	16719854	1	processed_transcript	NA	NA	1	1.11	rs21180
PD-IPF	ENSG00000264729	RP11-219A15.2	NA	17	16707941	16709021	1	lincRNA	NA	NA	1	1.11	rs21180
PD-IPF	ENSG00000264892	RP11-219A15.3	NA	17	16715761	16715965	1	pseudogene	NA	NA	1	1.11	rs21180
PD-IPF	ENSG00000226145	AC022596.6	NA	17	16721297	16725893	-1	pseudogene	NA	NA	1	1.11	rs21180
PD-IPF	ENSG00000131885	KRT17P1	NA	17	16744057	16749197	-1	pseudogene	NA	NA	1	2.87	rs21180
PD-IPF	ENSG00000205312	AC022596.2	NA	17	16750949	16756091	-1	pseudogene	NA	NA	1	2.87	rs21180
PD-IPF	ENSG00000229749	COTL1P1	NA	17	16757249	16757623	1	pseudogene	NA	NA	1	2.87	rs21180
PD-IPF	ENSG00000265853	RP1-48J14.1	NA	17	16796512	16796743	-1	pseudogene	NA	NA	1	3.07	rs21180
PD-IPF	ENSG00000240505	TNFRSF13B	23495	17	16832849	16875432	-1	protein_coding	6.72185e-13	0.175953	1	3.913	rs21180
PD-IPF	ENSG00000230709	AC104024.1	284191	17	16879313	16884667	-1	lincRNA	NA	NA	1	7.527	rs21180
PD-IPF	ENSG00000230969	AC104024.2	NA	17	16891643	16893491	1	lincRNA	NA	NA	1	7.527	rs21180
PD-IPF	ENSG00000133030	MPRIP	23164	17	16945859	17120993	1	protein_coding	0.870658	2.68113	1	3.908	rs21180
PD-OSA	ENSG00000265796	AC084357.1	NA	12	64224534	64224603	-1	miRNA	NA	NA	0	0	rs10784465
PD-OSA	ENSG00000196935	SRGAP1	57522	12	64238073	64541613	1	protein_coding	0.987851	-1.0026	1	2.807	rs10784465
PD-OSA	ENSG00000255629	RP11-196H14.3	NA	12	64540168	64541637	-1	antisense	NA	NA	1	2.807	rs10784465
PD-OSA	ENSG00000243024	RPS11P6	NA	12	64616117	64790845	1	pseudogene	NA	NA	1	0.162	rs10784465
PD-OSA	ENSG00000256192	RP11-290I21.2	NA	12	64660193	64660546	1	pseudogene	NA	NA	1	0.162	rs10784465
PD-OSA	ENSG00000185306	C12orf56	115749	12	64660217	64784972	-1	protein_coding	2.90933e-11	-0.257574	1	0.162	rs10784465
PD-OSA	ENSG00000184575	XPOT	11260	12	64798130	64844907	1	protein_coding	0.997934	-0.449524	1	1.925	rs10784465
PD-OSA	ENSG00000256199	RP11-439H13.2	NA	12	64900946	64927418	-1	lincRNA	NA	NA	1	0.219	rs10784465
PD-OSA	ENSG00000256670	RP11-338E21.1	NA	12	64992858	65003239	-1	antisense	NA	NA	1	12.34	rs10784465
PD-OSA	ENSG00000135677	GNS	2799	12	65107225	65153227	-1	protein_coding	0.0829053	-0.425472	1	7.539	rs10784465
PD-OSA	ENSG00000111490	TBC1D30	23329	12	65174589	65274812	1	protein_coding	NA	-0.289858	2	11.63	rs10784465
PD-OSA	ENSG00000255693	RP11-766N7.3	400046	12	65277174	65371302	1	lincRNA	NA	NA	1	0.266	rs10784465
PD-OSA	ENSG00000248995	RP11-766N7.4	NA	12	65314625	65376304	-1	lincRNA	NA	NA	1	0.266	rs10784465
PD-OSA	ENSG00000156076	WIF1	11197	12	65444406	65515346	-1	protein_coding	2.41723e-05	-0.475964	3	6.392	rs10784465
PD-OSA	ENSG00000207099	RNU6-166P	NA	12	65489529	65489635	1	snRNA	NA	NA	1	0.253	rs10784465
PD-OSA	ENSG00000255700	APOOP3	NA	12	65528468	65529053	1	pseudogene	NA	NA	1	1.303	rs10784465
PD-OSA	ENSG00000174099	MSRB3	253827	12	65672423	65882024	1	protein_coding	0.0070268	-0.542321	2	1.081	rs10784465
PD-OSA	ENSG00000256915	RP11-221N13.4	NA	12	66038114	66057079	1	lincRNA	NA	NA	3	7.004	rs10784465
PD-OSA	ENSG00000241749	RPSAP52	204010	12	66151800	66220754	-1	pseudogene	NA	NA	2	9.321	rs10784465
PD-OSA	ENSG00000149948	HMGA2	8091	12	66217911	66360075	1	protein_coding	0.733852	0.335144	4	17.07	rs10784465
PD-OSA	ENSG00000197301	RP11-366L20.2	101927810	12	66245120	66275947	-1	protein_coding	NA	NA	4	17.07	rs10784465
PD-OSA	ENSG00000211577	AC090673.1	NA	12	66251793	66251912	1	miRNA	NA	NA	3	17.07	rs10784465
PD-OSA	ENSG00000256259	RP11-366L20.4	NA	12	66421505	66424846	-1	lincRNA	NA	NA	1	0.528	rs10784465
PD-OSA	ENSG00000251857	RNA5SP362	NA	12	66460001	66460118	1	rRNA	NA	NA	1	6.094	rs10784465
PD-OSA	ENSG00000108379	WNT3	101929777	17	44839872	44910520	-1	protein_coding	0.946108	-0.191111	1	7.191	rs8064870
PD-OSA	ENSG00000108433	GOSR2	9570	17	45000483	45105003	1	protein_coding	0.000289194	0.147391	1	12.25	rs8064870
PD-OSA	ENSG00000262633	RP11-156P1.2	9570	17	45000499	45124520	1	protein_coding	NA	NA	1	12.25	rs8064870
PD-OSA	ENSG00000263142	LRRC37A17P	NA	17	45055847	45131935	1	pseudogene	NA	NA	1	12.25	rs8064870
PD-OSA	ENSG00000262879	RP11-156P1.3	101927060	17	45061411	45177689	-1	processed_transcript	NA	NA	1	12.25	rs8064870
PD-OSA	ENSG00000004897	CDC27	996	17	45195069	45266788	-1	protein_coding	0.486673	-0.787143	1	3.88	rs8064870
PD-OSA	ENSG00000221016	AC002558.1	NA	17	45195868	45195957	1	miRNA	NA	NA	1	3.88	rs8064870
PD-OSA	ENSG00000198336	MYL4	4635	17	45277812	45301045	1	protein_coding	0.000175625	-0.33374	1	0.365	rs8064870
PD-OSA	ENSG00000178852	EFCAB13	124989	17	45400656	45518678	1	protein_coding	8.21992e-19	-0.190445	3	3.8	rs8064870
PD-OSA	ENSG00000253347	CTD-2026D20.2	NA	17	45486688	45500892	-1	antisense	NA	NA	1	3.8	rs8064870
PD-OSA	ENSG00000228782	MRPL45P2	653479	17	45527934	45569858	-1	pseudogene	NA	NA	1	0.43	rs8064870
PD-OSA	ENSG00000141279	NPEPPS	9520	17	45600308	45700642	1	protein_coding	0.999906	-0.210177	2	1.539	rs8064870
PD-OSA	ENSG00000263766	RP11-580I16.2	NA	17	45681226	45726786	-1	antisense	NA	NA	2	0.824	rs8064870
PD-OSA	ENSG00000108424	KPNB1	3837	17	45726842	45762871	1	protein_coding	0.999994	-0.517927	2	1.705	rs8064870
PD-OSA	ENSG00000264558	RP11-138C9.1	NA	17	45759783	45760049	-1	antisense	NA	NA	0	0	rs8064870
PD-OSA	ENSG00000198933	TBKBP1	9755	17	45771447	45789416	1	protein_coding	0.0383778	-1.54619	1	10.31	rs8064870
PD-OSA	ENSG00000073861	TBX21	30009	17	45810610	45823485	1	protein_coding	0.963243	0.0831505	1	18.24	rs8064870
PD-OSA	ENSG00000264920	RP11-6N17.4	100506325	17	45968621	45973178	-1	processed_transcript	NA	NA	0	0	rs8064870
PD-OSA	ENSG00000167182	SP2	6668	17	45973516	46006323	1	protein_coding	0.969394	-1.2623	1	18.32	rs8064870
PD-OSA	ENSG00000234494	AC003665.1	100506325	17	45974696	46018776	-1	antisense	NA	NA	1	18.32	rs8064870
PD-OSA	ENSG00000266601	RP11-6N17.3	NA	17	46007048	46010472	-1	antisense	NA	NA	1	18.32	rs8064870
PD-OSA	ENSG00000263798	RP11-6N17.9	NA	17	46022790	46051804	1	processed_transcript	NA	NA	1	0.432	rs8064870
PD-OSA	ENSG00000167183	PRR15L	79170	17	46029333	46035244	-1	protein_coding	0.481247	0.303263	1	0.432	rs8064870
PD-OSA	ENSG00000108465	CDK5RAP3	80279	17	46045176	46059140	1	protein_coding	2.86539e-12	0.440978	1	0.432	rs8064870
PD-OSA	ENSG00000264701	RP11-6N17.10	NA	17	46057764	46073562	-1	antisense	NA	NA	0	0	rs8064870
PD-OSA	ENSG00000002919	SNX11	29916	17	46180719	46200436	1	protein_coding	3.85655e-05	0.140273	0	0	rs8064870
PD-OSA	ENSG00000244509	APOBEC3C	27350	22	39410088	39416357	1	protein_coding	0.0926246	0.148303	0	0	rs9623320
PD-OSA	ENSG00000227188	RP5-1104E15.6	NA	22	39871812	39872827	-1	antisense	NA	NA	0	0	rs9623320
PD-OSA	ENSG00000100335	MIEF1	54471	22	39895437	39914137	1	protein_coding	0.0628938	-0.368026	0	0	rs9623320
PD-OSA	ENSG00000100359	SGSM3	27352	22	40766595	40806293	1	protein_coding	1.00601e-06	-0.227062	0	0	rs9623320
PD-OSA	ENSG00000196588	MKL1	57591	22	40806285	41032706	-1	protein_coding	0.540324	-0.588524	11	10.83	rs9623320
PD-OSA	ENSG00000272834	RP5-1042K10.13	NA	22	40811007	40811449	1	antisense	NA	NA	1	0.603	rs9623320
PD-OSA	ENSG00000227413	RP5-1042K10.12	NA	22	40829140	40829645	1	pseudogene	NA	NA	3	0.603	rs9623320
PD-OSA	ENSG00000252124	AL031594.1	NA	22	40924061	40924137	-1	miRNA	NA	NA	0	0	rs9623320
PD-OSA	ENSG00000172912	COX6B1P3	NA	22	40965290	40965899	1	pseudogene	NA	NA	1	6.618	rs9623320
PD-OSA	ENSG00000230071	RPL4P6	NA	22	40982704	40984007	-1	pseudogene	NA	NA	2	7.429	rs9623320
PD-OSA	ENSG00000231907	GAPDHP37	NA	22	41069488	41070455	-1	pseudogene	NA	NA	1	9.598	rs9623320
PD-OSA	ENSG00000128285	MCHR1	2847	22	41074754	41078818	1	protein_coding	0.00114839	-0.0810065	7	9.598	rs9623320
PD-OSA	ENSG00000100372	SLC25A17	10478	22	41165634	41215403	-1	protein_coding	0.0241848	-0.779479	12	13.76	rs9623320
PD-OSA	ENSG00000230769	RP3-408N23.4	NA	22	41184781	41185271	-1	pseudogene	NA	NA	1	3.379	rs9623320
PD-OSA	ENSG00000233603	JTBP1	NA	22	41194043	41194289	1	pseudogene	NA	NA	1	3.379	rs9623320
PD-OSA	ENSG00000266594	MIR4766	100616283	22	41209887	41209962	-1	miRNA	NA	NA	9	13.76	rs9623320
PD-OSA	ENSG00000100380	ST13	6767	22	41220539	41253026	-1	protein_coding	0.659424	-1.5853	34	13.76	rs9623320
PD-OSA	ENSG00000196236	XPNPEP3	63929	22	41253081	41363838	1	protein_coding	8.88349e-06	-0.745194	47	12.52	rs9623320
PD-OSA	ENSG00000172404	DNAJB7	150353	22	41255553	41258130	-1	protein_coding	2.09351e-11	0.355457	13	10.24	rs9623320
PD-OSA	ENSG00000238887	snoU13	NA	22	41310883	41310986	1	snoRNA	NA	NA	7	3.76	rs9623320
PD-OSA	ENSG00000200683	RNU6-379P	NA	22	41313747	41313850	1	snRNA	NA	NA	9	5.047	rs9623320
PD-OSA	ENSG00000100387	RBX1	9978	22	41347351	41369313	1	protein_coding	0.940247	-0.356288	15	12.52	rs9623320
PD-OSA	ENSG00000100393	EP300	2033	22	41487790	41576081	1	protein_coding	1	NA	2	2.325	rs9623320
PD-OSA	ENSG00000221160	MIR1281	100302237	22	41488517	41488570	1	miRNA	NA	NA	0	0	rs9623320
PD-OSA	ENSG00000252859	RNU6-375P	NA	22	41564221	41564320	1	snRNA	NA	NA	1	2.325	rs9623320
PD-OSA	ENSG00000232754	RP1-85F18.6	NA	22	41565194	41579148	-1	antisense	NA	NA	1	2.325	rs9623320
PD-OSA	ENSG00000231993	RP1-85F18.5	NA	22	41570595	41593460	-1	antisense	NA	NA	1	2.325	rs9623320
PD-OSA	ENSG00000215771	LRRC37A14P	NA	22	41585731	41586192	-1	pseudogene	NA	NA	0	0	rs9623320
PD-OSA	ENSG00000100395	L3MBTL2	83746	22	41601209	41627275	1	protein_coding	0.013028	-0.618259	3	4.612	rs9623320
PD-OSA	ENSG00000235513	RP4-756G23.5	NA	22	41605126	41613631	-1	antisense	NA	NA	3	4.612	rs9623320
PD-OSA	ENSG00000167074	TEF	7008	22	41763337	41795330	1	protein_coding	0.421036	0.114829	1	5.228	rs9623320
PD-OSA	ENSG00000199865	RNU6-495P	NA	22	41773181	41773287	-1	snRNA	NA	NA	1	5.228	rs9623320
PD-OSA	ENSG00000273424	CTA-223H9.9	NA	22	41826938	41827379	1	lincRNA	NA	NA	1	0.977	rs9623320
PD-OSA	ENSG00000183864	TOB2	10766	22	41829496	41843027	-1	protein_coding	0.70319	-1.01474	0	0	rs9623320
PD-OSA	ENSG00000100410	PHF5A	84844	22	41855721	41864729	-1	protein_coding	0.849501	-0.474224	0	0	rs9623320
PD-OSA	ENSG00000100412	ACO2	50	22	41865129	41924993	1	protein_coding	0.454378	-0.617412	0	0	rs9623320
PD-OSA	ENSG00000100413	POLR3H	171568	22	41921808	41940610	-1	protein_coding	0.00200711	-1.30585	0	0	rs9623320
PD-OSA	ENSG00000100417	PMM1	5372	22	41972898	41985894	-1	protein_coding	0.000159925	NA	0	0	rs9623320
PD-OSA	ENSG00000100418	DESI1	27351	22	41994032	42017100	-1	protein_coding	0.0937225	-0.0430032	1	0.415	rs9623320
PD-OSA	ENSG00000100138	NHP2L1	4809	22	42069934	42086508	-1	protein_coding	0.710585	0.0822262	0	0	rs9623320
PD-OSA	ENSG00000184208	C22orf46	101927302	22	42084943	42094140	1	protein_coding	NA	-0.442689	0	0	rs9623320
PD-OSA	ENSG00000255782	Z83840.1	NA	22	42090191	42092048	1	pseudogene	NA	NA	0	0	rs9623320
PD-OSA	ENSG00000231261	HMGN2P10	NA	22	42105229	42105493	-1	pseudogene	NA	NA	0	0	rs9623320
PD-OSA	ENSG00000100147	CCDC134	79879	22	42196683	42222303	1	protein_coding	0.000741173	0.32496	0	0	rs9623320
PD-OSA	ENSG00000198911	SREBF2	6721	22	42229109	42303312	1	protein_coding	0.996272	0.410467	0	0	rs9623320
PD-asthma	ENSG00000183354	KIAA2026	158358	9	5881596	6007901	-1	protein_coding	NA	NA	2	4.069	rs117149936;rs370820588
PD-asthma	ENSG00000120215	MLANA	2315	9	5890802	5910606	1	protein_coding	1.07617e-08	0.195356	1	4.069	rs117149936
PD-asthma	ENSG00000137033	IL33	90865	9	6215805	6257983	1	protein_coding	1.05456e-08	0.958134	4	32	rs370820588
PD-asthma	ENSG00000170777	TPD52L3	89882	9	6328349	6331900	1	protein_coding	0.163388	-0.250331	1	0.22	rs79822462
PD-asthma	ENSG00000147854	UHRF2	115426	9	6413151	6507054	1	protein_coding	0.999646	NA	2	4.533	rs79822462
PD-asthma	ENSG00000178445	GLDC	2731	9	6532464	6645650	-1	protein_coding	4.87945e-14	0.293403	7	6.671	rs4419859
PD-asthma	ENSG00000182185	RAD51B	5890	14	68286496	69196935	1	protein_coding	1.45737e-09	0.621695	2	4.969	rs1570106
PD-asthma	ENSG00000169217	CD2BP2	10421	16	30362087	30366682	-1	protein_coding	0.000336174	-1.35975	1	10.56	rs13708
PD-asthma	ENSG00000169221	TBC1D10B	26000	16	30368423	30381585	-1	protein_coding	0.981784	-0.103269	1	10.56	rs13708
PD-asthma	ENSG00000180209	MYLPF	29895	16	30382255	30389312	1	protein_coding	0.602001	-0.35594	1	4.931	rs13708
PD-asthma	ENSG00000180035	ZNF48	197407	16	30389427	30411429	1	protein_coding	0.0324251	NA	1	4.931	rs13708
PD-asthma	ENSG00000180096	SEPT1	1731	16	30389454	30407312	-1	protein_coding	0.00293747	NA	1	4.931	rs13708
PD-asthma	ENSG00000270466	SEPT1	NA	16	30389755	30393863	-1	protein_coding	NA	NA	1	4.931	rs13708
PD-asthma	ENSG00000260869	AC002310.13	NA	16	30545548	30569600	-1	protein_coding	NA	NA	1	3.557	rs13708
PD-asthma	ENSG00000169951	ZNF764	92595	16	30565085	30569819	-1	protein_coding	3.06789e-08	-1.08037	1	3.557	rs13708
PD-asthma	ENSG00000229809	ZNF688	146542	16	30580667	30584055	-1	protein_coding	7.08656e-05	-0.833034	2	3.43	rs13708
PD-asthma	ENSG00000197162	ZNF785	146540	16	30585061	30597092	-1	protein_coding	3.83915e-14	-0.552379	2	3.43	rs13708
PD-asthma	ENSG00000099381	SETD1A	9739	16	30968615	30996437	1	protein_coding	0.999996	-0.894969	1	0.089	rs13708
PD-asthma	ENSG00000099377	HSD3B7	80270	16	30996519	31000473	1	protein_coding	4.64185e-06	-0.867417	1	0.089	rs13708
PD-asthma	ENSG00000268863	AC135048.1	NA	16	30996808	30997533	-1	protein_coding	NA	NA	1	0.089	rs13708
PD-asthma	ENSG00000103507	BCKDK	10295	16	31117428	31124110	1	protein_coding	0.00580436	-0.219605	1	13.18	rs13708
PD-asthma	ENSG00000103510	KAT8	84148	16	31127075	31142714	1	protein_coding	0.912576	0.0373929	1	13.18	rs13708
PD-asthma	ENSG00000140678	ITGAX	3687	16	31366455	31394318	1	protein_coding	6.11157e-05	0.796194	1	0.842	rs13708
PD-asthma	ENSG00000197302	ZNF720	101928852	16	31724550	31806190	1	protein_coding	0.0559605	2.41744	1	0.562	rs13708
PD-asthma	ENSG00000125409	TEKT3	64518	17	15207128	15244958	-1	protein_coding	3.19945e-14	0.0598698	1	1.348	rs21180
PD-asthma	ENSG00000011295	TTC19	54902	17	15902694	15948329	1	protein_coding	1.0503e-10	1.1213	1	0.075	rs21180
PD-asthma	ENSG00000141027	NCOR1	9611	17	15932471	16121499	-1	protein_coding	1	-0.470619	2	3.258	rs21180
PD-asthma	ENSG00000227782	AC002553.1	NA	17	15943505	15943994	1	protein_coding	NA	NA	1	0.075	rs21180
PD-asthma	ENSG00000108474	PIGL	9487	17	16120505	16252115	1	protein_coding	3.55119e-05	0.213751	1	4.168	rs21180
PD-asthma	ENSG00000187688	TRPV2	51393	17	16318856	16340317	1	protein_coding	0.00562916	0.475977	1	11.45	rs21180
PD-asthma	ENSG00000181350	FAM211A	388341	17	16344891	16395467	-1	protein_coding	0.732182	NA	1	11.45	rs21180
PD-asthma	ENSG00000240505	TNFRSF13B	23495	17	16832849	16875432	-1	protein_coding	6.72185e-13	0.175953	1	3.913	rs21180
PD-asthma	ENSG00000133030	MPRIP	23164	17	16945859	17120993	1	protein_coding	0.870658	2.68113	1	3.908	rs21180
PD-asthma	ENSG00000100403	ZC3H7B	23264	22	41697526	41756151	1	protein_coding	0.990762	-0.628158	43	15.36	rs139571
PD-asthma	ENSG00000167074	TEF	7008	22	41763337	41795330	1	protein_coding	0.421036	0.114829	69	15.85	rs139571
PD-asthma	ENSG00000183864	TOB2	10766	22	41829496	41843027	-1	protein_coding	0.70319	-1.01474	51	13.97	rs139571
PD-asthma	ENSG00000100410	PHF5A	84844	22	41855721	41864729	-1	protein_coding	0.849501	-0.474224	32	8.041	rs139571
PD-asthma	ENSG00000100412	ACO2	50	22	41865129	41924993	1	protein_coding	0.454378	-0.617412	58	9.721	rs139571
PD-asthma	ENSG00000100413	POLR3H	171568	22	41921808	41940610	-1	protein_coding	0.00200711	-1.30585	55	10.51	rs139571
PD-asthma	ENSG00000172346	CSDC2	27254	22	41956767	41973745	1	protein_coding	0.0798035	0.319356	51	9.224	rs139571
PD-asthma	ENSG00000100417	PMM1	5372	22	41972898	41985894	-1	protein_coding	0.000159925	NA	25	16.44	rs139571
PD-asthma	ENSG00000100418	DESI1	27351	22	41994032	42017100	-1	protein_coding	0.0937225	-0.0430032	23	16.44	rs139571
PD-asthma	ENSG00000196419	XRCC6	2547	22	42017123	42060044	1	protein_coding	0.996856	-0.128101	40	9.995	rs139571
PD-asthma	ENSG00000100138	NHP2L1	4809	22	42069934	42086508	-1	protein_coding	0.710585	0.0822262	51	16.28	rs139571
PD-asthma	ENSG00000184208	C22orf46	101927302	22	42084943	42094140	1	protein_coding	NA	-0.442689	43	16.28	rs139571
PD-asthma	ENSG00000167077	MEI1	150365	22	42095503	42195460	1	protein_coding	1.21592e-08	0.500155	165	16.28	rs139571
PD-asthma	ENSG00000100147	CCDC134	79879	22	42196683	42222303	1	protein_coding	0.000741173	0.32496	30	13.35	rs139571

## Sheet: Table S6
Table S6. Pleiotropic Genomic Loci Identified by FUMA Using PLACO Results
Trait pair	rsID	Chromosome	position	non_effect_allele	effect_allele	MAF	gwasP	r2	IndSigSNP	nearestGene	distance	function	CADD	RDB
PD-COPD	rs567516032	6	27006033	TTA	T	0.000994	NA	1	rs469228	VN1R12P	3943	intergenic	0.714	NA
PD-COPD	rs143325477	6	27019675	CAG	C	0.000994	NA	1	rs469228	VN1R13P	8468	intergenic	7.229	NA
PD-COPD	rs78640853	6	27029312	C	G	0.000994	NA	1	rs469228	VN1R13P	283	upstream	1.942	5
PD-COPD	rs9461329	6	27046292	C	G	0.000994	NA	1	rs469228	VN1R11P	4766	intergenic	8.294	5
PD-COPD	rs540982319	6	27068270	T	A	0.000994	NA	1	rs469228	RNU2-62P	9298	intergenic	1.574	NA
PD-COPD	rs563942288	6	27068271	A	T	0.000994	NA	1	rs469228	RNU2-62P	9297	intergenic	0.096	NA
PD-COPD	rs141048847	6	27106503	T	C	0.000994	NA	1	rs469228	HIST1H2BK	0	intronic	6.12	4
PD-COPD	rs113408773	6	27118249	G	A	0.000994	NA	1	rs469228	MIR3143	2781	intergenic	7.498	5
PD-COPD	rs73384398	6	27119019	T	C	0.000994	NA	1	rs469228	MIR3143	3551	intergenic	0.013	7
PD-COPD	rs191816694	6	27136772	A	G	0.000994	NA	1	rs469228	MIR3143	21304	intergenic	11.12	4
PD-COPD	rs73386688	6	27147061	T	A	0.000994	NA	1	rs469228	MIR3143	31593	intergenic	12.63	4
PD-COPD	rs139788983	6	27159403	C	T	0.000994	NA	1	rs469228	RP11-209A2.1	19619	intergenic	7.295	6
PD-COPD	rs73388520	6	27160745	A	G	0.000994	NA	1	rs469228	RP11-209A2.1	18277	intergenic	10.55	6
PD-COPD	rs9461343	6	27186878	G	A	0.000994	NA	1	rs469228	RP11-209A2.1	7185	intergenic	0.098	6
PD-COPD	rs201450486	6	27190827	T	G	0.000994	NA	1	rs469228	RP11-209A2.1	11134	intergenic	0.206	6
PD-COPD	rs112911865	6	27197723	C	A	0.000994	NA	1	rs469228	PRSS16	17756	intergenic	1.311	4
PD-COPD	rs9468019	6	27213592	T	C	0.000994	NA	1	rs469228	PRSS16	1887	intergenic	5.052	5
PD-COPD	rs73390650	6	27230172	T	A	0.000994	NA	1	rs469228	XXbac-BPGBPG24O18.1	5719	intergenic	5.654	7
PD-COPD	rs9461345	6	27234559	A	G	0.000994	NA	1	rs469228	XXbac-BPGBPG24O18.1	1332	intergenic	7.652	6
PD-COPD	rs191190691	6	27238296	T	G	0.000994	NA	1	rs469228	XXbac-BPGBPG24O18.1	1287	intergenic	0.012	7
PD-COPD	rs139354195	6	27238332	T	G	0.000994	NA	1	rs469228	XXbac-BPGBPG24O18.1	1323	intergenic	1.305	7
PD-COPD	rs556094756	6	27239798	TTC	T	0.000994	NA	1	rs469228	XXbac-BPGBPG24O18.1	2789	intergenic	2.586	NA
PD-COPD	rs3800315	6	27240513	C	A	0.000994	NA	1	rs469228	XXbac-BPGBPG24O18.1	3504	intergenic	3.82	5
PD-COPD	rs139693391	6	27249209	AG	A	0.000994	NA	1	rs469228	POM121L2	4472	intergenic	2.064	NA
PD-COPD	rs57138434	6	27263348	A	G	0.000994	NA	1	rs469228	POM121L2	0	intronic	1.881	2b
PD-COPD	rs9468031	6	27264897	T	C	0.000994	NA	1	rs469228	POM121L2	0	intronic	5.115	6
PD-COPD	rs9468034	6	27268622	A	G	0.000994	NA	1	rs469228	POM121L2	0	intronic	0.165	7
PD-COPD	rs56816292	6	27286429	G	A	0.000994	NA	1	rs469228	VN1R10P	6148	intergenic	0.279	6
PD-COPD	rs533781820	6	27288503	C	T	0.000994	NA	1	rs469228	VN1R10P	4074	intergenic	0.983	NA
PD-COPD	rs9468058	6	27292179	T	C	0.000994	NA	1	rs469228	VN1R10P	398	upstream	1.159	6
PD-COPD	rs73392617	6	27312099	C	A	0.000994	NA	1	rs469228	ZNF204P	13504	intergenic	0.456	6
PD-COPD	rs76281830	6	27345076	C	T	0.000994	NA	1	rs469228	ZNF391	0	intergenic	1.696	7
PD-COPD	rs192519875	6	27352051	T	C	0.000994	NA	1	rs469228	ZNF391	0	intergenic	10.65	7
PD-COPD	rs73392669	6	27352366	C	G	0.000994	NA	1	rs469228	ZNF391	0	intergenic	0.056	6
PD-COPD	rs56681435	6	27356419	A	G	0.000994	NA	1	rs469228	ZNF391	0	upstream	9.221	2b
PD-COPD	rs187493377	6	27357790	T	C	0.000994	NA	1	rs469228	ZNF391	0	intronic	8.469	5
PD-COPD	rs61740694	6	27368365	C	T	0.000994	NA	1	rs469228	ZNF391	0	exonic	0.046	7
PD-COPD	rs535150141	6	27374990	G	A	0.000994	NA	1	rs469228	RP1-153G14.4	246	upstream	0.184	NA
PD-COPD	rs143464374	6	27378801	CA	C	0.000994	NA	1	rs469228	MCFD2P1	3025	intergenic	4.666	NA
PD-COPD	rs115946506	6	27384474	T	A	0.000994	NA	1	rs469228	MCFD2P1	8698	intergenic	0.583	7
PD-COPD	rs76125771	6	27393396	A	G	0.000994	NA	1	rs469228	MCFD2P1	17620	intergenic	14.33	5
PD-COPD	rs189756983	6	27460020	A	G	0.000994	NA	1	rs469228	ZNF184	19122	intergenic	2.978	7
PD-COPD	rs73395394	6	27478403	A	G	0.000994	NA	1	rs469228	XXbac-BPGBPG34I8.1	4414	intergenic	3.566	6
PD-COPD	rs6456796	6	27504633	A	G	0.000994	NA	1	rs469228	HNRNPA1P1	12514	intergenic	7.017	6
PD-COPD	rs79729447	6	27518610	C	T	0.000994	NA	1	rs469228	XXbac-BPG34I8.3	9990	intergenic	6.833	3a
PD-COPD	rs545498257	6	27523432	C	T	0.000994	NA	1	rs469228	XXbac-BPG34I8.3	5168	intergenic	0.802	NA
PD-COPD	rs183260104	6	27545248	G	A	0.000994	NA	1	rs469228	XXbac-BPG34I8.3	15724	intergenic	0.184	4
PD-COPD	rs572266513	6	27554686	TA	T	0.000994	NA	1	rs469228	RNU6-471P	9504	intergenic	0.206	NA
PD-COPD	rs200287430	6	27564291	A	AT	0.000994	NA	1	rs469228	RNU6-471P	0	ncRNA_exonic	3.459	NA
PD-COPD	rs13340474	6	27568106	T	C	0.000994	NA	1	rs469228	RNU6-471P	3809	intergenic	2.271	4
PD-COPD	rs533333409	6	27581423	C	T	0.000994	NA	1	rs469228	RNU6-471P	17126	intergenic	2.632	NA
PD-COPD	rs186215988	6	27619360	G	A	0.000994	NA	1	rs469228	RP1-15D7.1	1020	intergenic	3.079	3a
PD-COPD	rs564960570	6	27619360	G	GTGTA	0.000994	NA	1	rs469228	RP1-15D7.1	1020	NA	1.636	NA
PD-COPD	rs186825291	6	27619957	T	C	0.000994	NA	1	rs469228	RP1-15D7.1	423	downstream	6.313	7
PD-COPD	rs76281738	6	27630625	C	G	0.000994	NA	1	rs469228	RP1-15D7.1	10020	intergenic	4.57	5
PD-COPD	rs183382877	6	27655967	G	C	0.000994	NA	1	rs469228	RP1-15D7.1	35362	intergenic	13.46	4
PD-COPD	rs181533831	6	27657953	T	G	0.000994	NA	1	rs469228	RP1-15D7.1	37348	intergenic	0.928	6
PD-COPD	rs78561396	6	27678331	T	C	0.000994	NA	1	rs469228	RP1-97D16.1	26447	intergenic	1.269	7
PD-COPD	6:27756344:A:C	6	27756344	C	A	0.000994	NA	1	rs469228	RSL24D1P1	7453	intergenic	2.233	7
PD-COPD	rs10946946	6	27788299	G	A	0.000994	NA	1	rs469228	HIST1H4J	3584	intergenic	1.835	7
PD-COPD	rs555903437	6	27795495	T	G	0.000994	NA	1	rs469228	HIST1H4J	3237	intergenic	1.053	NA
PD-COPD	rs146250974	6	27805938	G	C	0.000994	NA	1	rs469228	HIST1H2AK	0	exonic	13.61	4
PD-COPD	rs74926597	6	27820435	A	G	0.000994	NA	1	rs469228	HIST1H2BN	0	UTR3	0.529	7
PD-COPD	rs12110818	6	27825501	C	T	0.000994	NA	1	rs469228	HIST1H2BN	2013	intergenic	3.205	6
PD-COPD	rs12111482	6	27848290	G	A	0.000994	NA	1	rs469228	HIST1H4L	7000	intergenic	1.523	7
PD-COPD	rs77324308	6	27854031	G	A	0.000994	NA	1	rs469228	HIST1H3J	4061	intergenic	2.225	4
PD-COPD	rs76214997	6	27864475	C	A	0.000994	NA	1	rs469228	RNU7-26P	806	downstream	1.492	4
PD-COPD	rs190465862	6	27875364	A	G	0.000994	NA	1	rs469228	OR2B2	3598	intergenic	8.487	5
PD-COPD	rs78679498	6	27875946	G	A	0.000994	NA	1	rs469228	OR2B2	3016	intergenic	1.829	3a
PD-COPD	rs115884014	6	27880507	G	A	0.000994	NA	1	rs469228	OR2B2	332	upstream	4.634	7
PD-COPD	rs115639664	6	27881420	C	T	0.000994	NA	1	rs469228	OR2B2	1245	intergenic	0.018	7
PD-COPD	rs188791822	6	27897733	A	G	0.000994	NA	1	rs469228	OR2W6P	7509	intergenic	0.376	7
PD-COPD	rs10946947	6	27906230	A	G	0.000994	NA	1	rs469228	OR2W6P	48	downstream	3.122	7
PD-COPD	rs79712989	6	27909297	C	T	0.000994	NA	1	rs469228	OR2W6P	3115	intergenic	3.809	5
PD-COPD	rs562523347	6	27911964	T	C	0.000994	NA	1	rs469228	OR2W6P	5782	intergenic	0.761	NA
PD-COPD	rs550517810	6	27918981	T	C	0.000994	NA	1	rs469228	OR2B6	6037	intergenic	5.455	NA
PD-COPD	rs116064506	6	27930584	G	C	0.000994	NA	1	rs469228	RPLP2P1	2368	intergenic	1.852	5
PD-COPD	rs75219442	6	27934900	G	A	0.000994	NA	1	rs469228	RPLP2P1	1607	intergenic	2.727	4
PD-COPD	rs114447298	6	27935947	T	C	0.000994	NA	1	rs469228	RPLP2P1	2654	intergenic	5.737	5
PD-COPD	rs114784465	6	27960544	G	A	0.000994	NA	1	rs469228	OR2W4P	14690	intergenic	0.619	7
PD-COPD	rs74447982	6	27967361	G	A	0.000994	NA	1	rs469228	IQCB2P	11139	intergenic	6.951	7
PD-COPD	rs115962837	6	27981158	C	T	0.000994	NA	1	rs469228	IQCB2P	1024	intergenic	11.43	7
PD-COPD	rs79247967	6	27999187	A	G	0.000994	NA	1	rs469228	OR2W2P	2537	intergenic	7.817	7
PD-COPD	rs469228	6	28002926	A	G	0.000994	2.64844e-07	1	rs469228	OR2W2P	292	downstream	1.76	7
PD-COPD	rs76999482	6	28003556	T	C	0.000994	NA	1	rs469228	OR2W2P	922	downstream	8.316	6
PD-COPD	rs542194718	6	28042225	C	G	0.000994	NA	1	rs469228	OR1F12	213	downstream	0.541	NA
PD-COPD	rs75481861	6	28046259	A	C	0.000994	NA	1	rs469228	RP1-313I6.12	310	downstream	0.526	5
PD-COPD	rs139970647	6	28055213	G	A	0.000994	NA	1	rs469228	ZNF165	0	intronic	0.329	7
PD-COPD	rs36112794	6	28056829	A	T	0.000994	NA	1	rs469228	ZNF165	0	exonic	18.27	5
PD-COPD	rs77122594	6	28066520	CTG	C	0.000994	NA	1	rs469228	ZSCAN12P1	5077	intergenic	6.584	NA
PD-COPD	rs75571045	6	28105461	G	T	0.000994	NA	1	rs469228	RP1-265C24.8	0	ncRNA_exonic	3.445	4
PD-COPD	rs59249466	6	28113899	G	A	0.000994	NA	1	rs469228	ZKSCAN8	0	intronic	1.3	7
PD-COPD	rs146894260	6	28117272	C	T	0.000994	NA	1	rs469228	ZKSCAN8	0	exonic	3.5	5
PD-COPD	rs138119418	6	28129563	T	C	0.000994	NA	1	rs469228	ZNF192P1	0	ncRNA_exonic	9.296	2b
PD-COPD	rs139559205	6	28131602	C	T	0.000994	NA	1	rs469228	ZNF192P1	0	ncRNA_intronic	2.508	7
PD-COPD	rs74571529	6	28131612	C	T	0.000994	NA	1	rs469228	ZNF192P1	0	ncRNA_intronic	1.342	6
PD-COPD	rs77779601	6	28132161	T	C	0.000994	NA	1	rs469228	ZNF192P1	0	ncRNA_intronic	3.065	7
PD-COPD	rs16893741	6	28140293	T	C	0.000994	NA	1	rs469228	ZNF192P1	2920	intergenic	3.421	7
PD-COPD	6:28156476:G:T	6	28156476	G	T	0.000994	NA	1	rs469228	ZNF192P2	0	NA	9.295	NA
PD-COPD	6:28156476:C:G	6	28156476	G	C	0.1074	NA	1	rs469228	ZNF192P2	0	ncRNA_exonic	9.378	5
PD-COPD	rs144127525	6	28159087	G	T	0.000994	NA	1	rs469228	ZNF192P2	1876	intergenic	0.233	6
PD-COPD	rs151165982	6	28161470	G	A	0.000994	NA	1	rs469228	ZNF192P2	4259	intergenic	12.53	6
PD-COPD	rs115713078	6	28196400	A	G	0.000994	NA	1	rs469228	ZSCAN9	0	UTR3	6.015	7
PD-COPD	rs146732010	6	28211339	A	C	0.000994	NA	1	rs469228	ZKSCAN4	1061	intergenic	0.283	7
PD-COPD	rs62638679	6	28214811	A	G	0.000994	NA	1	rs469228	ZKSCAN4	0	exonic	11.12	6
PD-COPD	6:28217797:A:G	6	28217797	G	A	0.000994	NA	1	rs469228	ZKSCAN4	0	intronic	0.843	7
PD-COPD	6:28217797:G:T	6	28217797	G	T	0.1143	NA	1	rs469228	ZKSCAN4	0	NA	0.612	NA
PD-COPD	rs141873462	6	28222112	T	C	0.000994	NA	1	rs469228	ZKSCAN4	0	intronic	5.373	2a
PD-COPD	rs144399148	6	28238922	C	T	0.000994	NA	1	rs469228	RP5-874C20.3	0	ncRNA_intronic	0.816	6
PD-COPD	rs149134857	6	28287154	C	T	0.000994	NA	1	rs469228	RP5-874C20.6	282	downstream	0.372	6
PD-COPD	rs140186444	6	28288886	C	T	0.000994	NA	1	rs469228	RP5-874C20.6	1256	intergenic	1.44	4
PD-COPD	rs141204233	6	28354196	C	T	0.000994	NA	1	rs469228	ZSCAN12	0	intronic	0.919	6
PD-COPD	rs147561590	6	28369892	C	T	0.000994	NA	1	rs469228	ZSCAN12	2380	intergenic	0.026	4
PD-COPD	rs138553176	6	28395380	A	C	0.000994	NA	1	rs469228	ZSCAN23	4326	intergenic	2.394	7
PD-COPD	rs527666750	6	28418120	C	T	0.000994	NA	1	rs469228	COX11P1	2535	intergenic	2.024	NA
PD-COPD	rs199611721	6	28420798	CT	C	0.000994	NA	1	rs469228	OR2E1P	2626	intergenic	0.044	NA
PD-COPD	rs185271242	6	28420804	G	A	0.000994	NA	1	rs469228	OR2E1P	2620	intergenic	1.116	6
PD-COPD	rs146777132	6	28436615	G	A	0.000994	NA	1	rs469228	OR2E1P	12696	intergenic	0.061	5
PD-COPD	rs61306760	6	28449379	C	T	0.000994	NA	1	rs469228	GPX6	21693	intergenic	0.07	5
PD-COPD	rs139981426	6	28452244	A	G	0.000994	NA	1	rs469228	GPX6	18828	intergenic	1.56	6
PD-COPD	rs58294982	6	28454989	T	C	0.000994	NA	1	rs469228	GPX6	16083	intergenic	7.867	2c
PD-COPD	rs181700577	6	28469775	G	A	0.000994	NA	1	rs469228	GPX6	1297	intergenic	0.566	7
PD-COPD	rs190524260	6	28469904	G	A	0.000994	NA	1	rs469228	GPX6	1168	intergenic	0.582	7
PD-COPD	rs148797307	6	28472549	C	T	0.000994	NA	1	rs469228	GPX6	0	intronic	0.268	5
PD-COPD	rs769188	6	28499566	C	G	0.000994	NA	1	rs469228	GPX5	0	exonic	24.9	2b
PD-COPD	rs28382613	6	28502572	T	C	0.000994	NA	1	rs469228	GPX5	0	UTR3	0.447	6
PD-COPD	rs138573211	6	28503644	A	G	0.000994	NA	1	rs469228	GPX5	914	downstream	1.806	4
PD-COPD	rs114998500	6	28505258	C	T	0.000994	NA	1	rs469228	GPX5	2528	intergenic	2.175	3a
PD-COPD	rs139339717	6	28506469	A	C	0.000994	NA	1	rs469228	GPX5	3739	intergenic	2.087	6
PD-COPD	rs115844898	6	28509938	C	T	0.000994	NA	1	rs469228	GPX5	7208	intergenic	0.527	7
PD-COPD	rs141952126	6	28527774	C	T	0.000994	NA	1	rs469228	SCAND3	11632	intergenic	3.298	5
PD-COPD	rs570804350	6	28557002	A	G	0.000994	NA	1	rs469228	SCAND3:RP5-1186N24.3	00:00:00	ncRNA_intronic	4.365	NA
PD-COPD	rs150191521	6	28565400	A	G	0.000994	NA	1	rs469228	SCAND3	0	intergenic	5.243	4
PD-COPD	rs141809275	6	28599357	C	T	0.000994	NA	1	rs469228	RP11-373N24.2	1800	intergenic	2.569	6
PD-COPD	rs141474708	6	28670584	A	T	0.000994	NA	1	rs469228	RPSAP2	29209	intergenic	3.743	6
PD-COPD	rs143347111	6	28802487	G	T	0.000994	NA	1	rs469228	XXbac-BPG308K3.5	3158	intergenic	5.062	7
PD-COPD	rs143453039	6	28812919	G	A	0.000994	NA	1	rs469228	XXbac-BPG308K3.5	6135	intergenic	0.568	6
PD-COPD	rs140687522	6	28843111	A	G	0.000994	NA	1	rs469228	XXbac-BPG308K3.6	10703	intergenic	5.612	5
PD-COPD	rs150355153	6	28850250	G	A	0.000994	NA	1	rs469228	ZNF90P2	6358	intergenic	0.17	6
PD-COPD	rs544702161	6	28850379	C	T	0.000994	NA	1	rs469228	ZNF90P2	6229	intergenic	2.743	NA
PD-COPD	rs151282080	6	28870024	T	C	0.000994	NA	1	rs469228	TRIM27	754	downstream	1.845	5
PD-COPD	rs534912285	6	28911490	G	A	0.000994	NA	1	rs469228	C6orf100	163	upstream	0.104	NA
PD-COPD	rs545187070	6	28952883	T	C	0.000994	NA	1	rs469228	HCG15	1096	intergenic	1.366	NA
PD-COPD	rs911492	9	4168771	C	T	0.1223	0.000271984	0.78354	rs7044458	GLIS3	0	intronic	1.661	NA
PD-COPD	rs7044458	9	4175223	A	C	0.1521	5.07467e-06	1	rs7044458	GLIS3	0	intronic	9.102	7
PD-COPD	rs59023164	9	4175400	C	T	0.1223	0.000360676	0.797397	rs7044458	GLIS3	0	intronic	4.461	5
PD-COPD	rs142103370	9	4175484	ATAACTT	A	0.1312	NA	0.746743	rs7044458	GLIS3	0	intronic	4.629	NA
PD-COPD	rs60619356	9	4175945	T	C	0.1143	0.000297915	0.747697	rs7044458	GLIS3	0	intronic	0.793	5
PD-COPD	rs11787721	9	4176647	C	G	0.1223	0.000372442	0.797397	rs7044458	GLIS3	0	intronic	0.051	6
PD-COPD	rs55808775	9	4177366	C	T	0.1034	0.017272	0.667995	rs7044458	GLIS3	0	intronic	4.584	6
PD-COPD	rs10118752	9	4177449	T	C	0.1213	0.00843401	0.671056	rs7044458	GLIS3	0	intronic	0.877	7
PD-COPD	rs139080662	9	4188747	G	T	0.1233	NA	0.608138	rs7044458	GLIS3	0	intronic	2.682	6
PD-COPD	rs62543613	9	4191469	T	C	0.1233	0.00548646	0.608138	rs7044458	GLIS3	0	intronic	5.291	5
PD-COPD	rs10815376	9	6222149	T	C	0.3141	0.000861647	0.750439	rs7850988	IL33	0	intronic	4.849	5
PD-COPD	rs2006682	9	6227045	G	C	0.2873	0.00173202	0.608345	rs7850988	IL33	0	intronic	2.882	4
PD-COPD	rs12551268	9	6231318	A	C	0.2803	0.000581349	0.622842	rs7850988	IL33	0	intronic	2.301	7
PD-COPD	rs12339348	9	6233082	A	T	0.2276	0.000149191	0.703166	rs7850988	IL33	0	intronic	8.137	5
PD-COPD	rs17582919	9	6233376	T	C	0.2276	0.000149237	0.703166	rs7850988	IL33	0	intronic	4.871	6
PD-COPD	rs10975504	9	6235009	A	G	0.2306	0.00023401	0.704757	rs7850988	IL33	0	intronic	5.6	6
PD-COPD	rs112935616	9	6236830	C	T	0.2276	0.000163541	0.721104	rs7850988	IL33	0	intronic	4.746	5
PD-COPD	rs10975507	9	6236977	A	T	0.2306	0.00013283	0.704757	rs7850988	IL33	0	intronic	3.691	4
PD-COPD	rs17498196	9	6237547	A	C	0.2296	0.000136346	0.710166	rs7850988	IL33	0	intronic	8.974	5
PD-COPD	rs72689561	9	6238750	A	C	0.2296	0.00022988	0.710166	rs7850988	IL33	0	intronic	7.821	5
PD-COPD	rs10815391	9	6240235	T	G	0.2316	0.000234648	0.708972	rs7850988	IL33	0	intronic	2.227	7
PD-COPD	rs10815392	9	6240236	T	C	0.2316	0.000234665	0.708972	rs7850988	IL33	0	intronic	2.68	7
PD-COPD	rs10815393	9	6240324	T	C	0.2306	0.00020291	0.704757	rs7850988	IL33	0	intronic	4.25	7
PD-COPD	rs72689565	9	6240953	A	C	0.2286	0.000275851	0.715615	rs7850988	IL33	0	intronic	4.905	NA
PD-COPD	rs7035413	9	6243119	A	G	0.2296	0.000298847	0.710166	rs7850988	IL33	0	intronic	6.802	5
PD-COPD	rs7038893	9	6243392	T	C	0.2296	0.000265115	0.710166	rs7850988	IL33	0	intronic	4.928	7
PD-COPD	rs744567	9	6292602	C	G	0.2465	4.70219e-05	0.822154	rs7850988	RP11-307L3.2	13448	intergenic	7.44	7
PD-COPD	rs143305466	9	6297108	C	T	0.2485	NA	0.820792	rs7850988	RP11-307L3.2	17954	intergenic	0.358	6
PD-COPD	rs17756142	9	6301578	A	C	0.2525	6.14375e-05	0.800329	rs7850988	RP11-307L3.2	22424	intergenic	2.643	7
PD-COPD	rs112695858	9	6303358	G	A	0.2823	6.09768e-05	0.923516	rs7850988	RP11-307L3.2	24204	intergenic	2.192	7
PD-COPD	rs67128098	9	6303498	A	T	0.2823	5.69192e-05	0.923516	rs7850988	RP11-307L3.2	24344	intergenic	3.032	6
PD-COPD	rs7467258	9	6305622	G	A	0.3171	0.00011125	0.769128	rs7850988	TPD52L3	22726	intergenic	1.435	6
PD-COPD	rs2169287	9	6305904	C	A	0.2763	6.00524e-05	0.942891	rs7850988	TPD52L3	22444	intergenic	1.448	5
PD-COPD	rs10975539	9	6308729	C	T	0.2455	4.84981e-05	0.818222	rs7850988	TPD52L3	19619	intergenic	10.76	7
PD-COPD	rs1322166	9	6309862	C	T	0.3201	0.000103985	0.785072	rs7850988	TPD52L3	18486	intergenic	0.59	7
PD-COPD	rs10975540	9	6310195	A	G	0.2853	3.06449e-05	0.938016	rs7850988	TPD52L3	18153	intergenic	7.554	5
PD-COPD	rs17705436	9	6310908	C	G	0.2525	5.04532e-05	0.800329	rs7850988	TPD52L3	17440	intergenic	5.001	5
PD-COPD	rs1973136	9	6313276	A	G	0.2833	2.75051e-05	0.918777	rs7850988	TPD52L3	15072	intergenic	2.687	5
PD-COPD	rs7851000	9	6314487	C	T	0.2763	3.47865e-05	0.942891	rs7850988	TPD52L3	13861	intergenic	12.33	5
PD-COPD	rs72691711	9	6315489	G	A	0.2753	3.2135e-05	0.947757	rs7850988	TPD52L3	12859	intergenic	3.921	5
PD-COPD	rs10114407	9	6317169	G	C	0.3211	9.66028e-05	0.7732	rs7850988	TPD52L3	11179	intergenic	0.471	3a
PD-COPD	rs111819898	9	6318195	T	C	0.2883	9.62006e-05	0.64037	rs7850988	TPD52L3	10153	intergenic	0.716	6
PD-COPD	rs55779033	9	6322680	T	C	0.3171	4.8092e-05	0.795067	rs7850988	TPD52L3	5668	intergenic	0.353	7
PD-COPD	rs7861651	9	6322729	G	A	0.3161	4.37301e-05	0.798837	rs7850988	TPD52L3	5619	intergenic	0.365	7
PD-COPD	rs4742179	9	6324376	A	C	0.3131	6.86441e-05	0.800792	rs7850988	TPD52L3	3972	intergenic	2.042	6
PD-COPD	rs372456015	9	6325633	CT	C	0.2833	NA	0.937818	rs7850988	TPD52L3	2715	intergenic	8.793	NA
PD-COPD	rs10758764	9	6326825	T	A	0.3151	7.00689e-05	0.810976	rs7850988	TPD52L3	1523	intergenic	3.331	7
PD-COPD	rs10491836	9	6331421	C	A	0.2843	1.04502e-05	0.980805	rs7850988	TPD52L3	0	UTR3	9.751	2b
PD-COPD	rs16924356	9	6331610	G	A	0.2833	1.01652e-05	0.985601	rs7850988	TPD52L3	0	UTR3	0.691	5
PD-COPD	rs721352	9	6332901	A	C	0.3161	3.72825e-05	0.826122	rs7850988	TPD52L3	1000	intergenic	4.695	NA
PD-COPD	rs2381426	9	6333666	A	C	0.3211	2.25733e-05	0.826277	rs7850988	TPD52L3	1765	intergenic	2.092	7
PD-COPD	rs10739094	9	6333685	T	A	0.2823	9.49223e-06	0.990424	rs7850988	TPD52L3	1784	intergenic	0.104	6
PD-COPD	rs7850988	9	6335760	A	T	0.2843	8.25185e-06	1	rs7850988	TPD52L3	3859	intergenic	5.593	6
PD-COPD	rs375077241	9	6338389	T	C	0.2485	NA	0.846489	rs7850988	TPD52L3	6488	intergenic	3.836	7
PD-COPD	rs77585556	9	6338950	G	C	0.3201	NA	0.821676	rs7850988	TPD52L3	7049	intergenic	5.701	6
PD-COPD	rs731585	9	6342328	G	A	0.3191	2.22364e-05	0.817108	rs7850988	TPD52L3	10427	intergenic	12.16	7
PD-COPD	rs10975547	9	6343945	G	A	0.2793	8.95608e-06	0.976205	rs7850988	TPD52L3	12044	intergenic	8.613	7
PD-COPD	rs1574817	9	6345296	T	G	0.3191	2.65845e-05	0.808854	rs7850988	TPD52L3	13395	intergenic	0.659	7
PD-COPD	rs7027505	9	6345740	C	T	0.2793	9.79754e-06	0.976205	rs7850988	TPD52L3	13839	intergenic	4.42	7
PD-COPD	rs7020404	9	6346844	T	C	0.3201	2.82925e-05	0.813394	rs7850988	TPD52L3	14943	intergenic	1.469	7
PD-COPD	rs7035333	9	6347651	G	A	0.2465	1.48259e-05	0.832145	rs7850988	TPD52L3	15750	intergenic	4.478	7
PD-COPD	rs16924428	9	6351111	A	G	0.2783	1.26089e-05	0.971456	rs7850988	TPD52L3	19210	intergenic	9.635	7
PD-COPD	rs59606381	9	6362124	C	T	0.2783	1.66105e-05	0.971416	rs7850988	TPD52L3	30223	intergenic	0.888	6
PD-COPD	rs7851246	9	6362365	G	A	0.2783	1.70749e-05	0.971416	rs7850988	TPD52L3	30464	intergenic	0.928	6
PD-COPD	rs10975558	9	6364449	C	T	0.2773	1.98744e-05	0.966716	rs7850988	TPD52L3	32548	intergenic	4.155	5
PD-COPD	rs4742211	9	6535500	C	T	0.2177	2.76587e-05	0.615063	rs7850988	GLDC	0	intronic	0.247	5
PD-COPD	rs112783459	10	12248693	C	T	0.007952	3.13838e-06	1	rs112783459	CDC123	0	intronic	0.031	7
PD-COPD	rs145664976	10	12248695	T	C	0.005964	NA	0.746982	rs112783459	CDC123	0	intronic	0.035	7
PD-COPD	rs11231176	11	62659506	A	G	0.001988	4.37283e-07	1	rs11231176	SLC3A2	3153	intergenic	0.237	7
PD-COPD	rs141122060	14	82904690	G	A	0.000994	NA	1	rs1698269	snoU13	23741	intergenic	0.298	6
PD-COPD	rs77829026	14	82969610	T	C	0.000994	NA	1	rs1698269	snoU13	41077	intergenic	18.71	6
PD-COPD	rs76958586	14	82987928	C	T	0.000994	NA	1	rs1698269	snoU13	59395	intergenic	5.092	5
PD-COPD	rs189473452	14	82994302	C	T	0.000994	NA	1	rs1698269	snoU13	65769	intergenic	1.187	7
PD-COPD	rs143415091	14	83087200	A	C	0.000994	NA	1	rs1698269	RP11-406A9.2	21763	intergenic	1.889	7
PD-COPD	rs76927453	14	83290458	G	A	0.000994	NA	1	rs1698269	RP11-11K13.1	27892	intergenic	0.25	7
PD-COPD	rs143552804	14	83341419	C	A	0.000994	NA	1	rs1698269	RP11-11K13.1	78853	intergenic	2.937	6
PD-COPD	rs543650081	14	83553573	A	C	0.000994	NA	1	rs1698269	RNU7-51P	38588	intergenic	4.955	NA
PD-COPD	rs79872416	14	83639482	C	T	0.000994	NA	1	rs1698269	RNU7-51P	124497	intergenic	0.801	7
PD-COPD	rs564770927	14	83689593	A	G	0.000994	NA	1	rs1698269	RNU7-51P	174608	intergenic	7.196	NA
PD-COPD	rs532022986	14	83819637	G	A	0.000994	NA	1	rs1698269	RNU7-51P	304652	intergenic	0.986	NA
PD-COPD	rs1698269	14	83844451	T	A	0.000994	2.43751e-06	1	rs1698269	RNU7-51P	329466	intergenic	1.006	7
PD-COPD	rs78755093	14	83934718	G	A	0.000994	NA	1	rs1698269	RNU6ATAC28P	282009	intergenic	0.779	5
PD-COPD	rs569677747	14	84431296	G	A	0.000994	NA	1	rs1698269	RP11-353P15.1	49901	intergenic	6.086	NA
PD-COPD	rs138681146	14	84450787	C	T	0.000994	NA	1	rs1698269	RP11-353P15.1	69392	intergenic	0.76	6
PD-COPD	rs79968061	14	84478670	T	A	0.000994	NA	1	rs1698269	RP11-353P15.1	97275	intergenic	0.449	7
PD-COPD	rs187927447	14	84558589	C	T	0.000994	NA	1	rs1698269	CTD-2320B12.3	80595	intergenic	1.682	7
PD-COPD	rs143698822	14	84588368	A	G	0.000994	NA	1	rs1698269	CTD-2320B12.3	50816	intergenic	0.755	6
PD-COPD	rs574776242	14	84637493	A	G	0.000994	NA	1	rs1698269	CTD-2320B12.3	1691	intergenic	3.124	NA
PD-COPD	rs573724412	14	84739096	C	T	0.000994	NA	1	rs1698269	CTD-2320B12.2	95663	intergenic	2.481	NA
PD-COPD	rs148113475	14	84776260	A	G	0.000994	NA	1	rs1698269	CTD-2320B12.2	132827	intergenic	6.772	6
PD-COPD	rs147052557	14	84788475	G	A	0.000994	NA	1	rs1698269	CTD-2320B12.2	145042	intergenic	0.033	7
PD-COPD	rs184519334	16	30058675	C	T	0.000994	NA	1	rs13708	FAM57B	0	intronic	0.315	5
PD-COPD	rs186097252	16	30156864	C	T	0.000994	NA	1	rs13708	MAPK3	22036	intergenic	4.222	7
PD-COPD	rs193130862	16	30340829	T	C	0.000994	NA	1	rs13708	RP11-347C12.2	0	ncRNA_intronic	6.569	7
PD-COPD	rs543408075	16	30363456	G	A	0.000994	NA	1	rs13708	CD2BP2	0	UTR3	10.56	NA
PD-COPD	rs185756086	16	30395098	C	T	0.000994	NA	1	rs13708	ZNF48:SEPT1	00:00:00	intronic	4.931	4
PD-COPD	rs137953624	16	30557326	G	A	0.000994	NA	1	rs13708	AC002310.13	0	intronic	3.557	5
PD-COPD	rs187238586	16	30584316	C	A	0.000994	NA	1	rs13708	AC002310.7	0	ncRNA_intronic	2.585	5
PD-COPD	rs191636755	16	30587877	T	C	0.000994	NA	1	rs13708	AC002310.7:ZNF785	00:00:00	ncRNA_intronic	3.43	5
PD-COPD	rs138465880	16	30813729	C	A	0.000994	NA	1	rs13708	ZNF629	15205	intergenic	1.249	5
PD-COPD	rs13708	16	30989488	G	A	0.000994	1.28352e-15	1	rs13708	SETD1A	0	intronic	0.089	NA
PD-COPD	rs192092689	16	31119916	C	G	0.000994	NA	1	rs13708	BCKDK	0	UTR5	13.18	4
PD-COPD	rs578045976	16	31358035	C	T	0.000994	NA	1	rs13708	ITGAX	8419	intergenic	0.842	NA
PD-COPD	rs191977269	16	31558740	T	C	0.000994	NA	1	rs13708	VN1R64P	0	ncRNA_exonic	9.669	5
PD-COPD	rs183355253	16	31776323	C	G	0.000994	NA	1	rs13708	ZNF720	0	intronic	0.562	7
PD-COPD	rs550082943	16	31824050	T	C	0.000994	NA	1	rs13708	VN1R3	3884	intergenic	1.321	NA
PD-COPD	rs181060870	16	31988266	C	A	0.000994	NA	1	rs13708	RP11-1166P10.1	0	ncRNA_intronic	0.133	5
PD-COPD	rs546319540	17	44878248	C	T	0.000994	NA	1	rs8064870	WNT3	0	intronic	7.191	NA
PD-COPD	rs182878428	17	45189828	A	T	0.000994	NA	1	rs8064870	CDC27	5240	intergenic	3.88	7
PD-COPD	rs190370602	17	45278736	T	G	0.000994	NA	1	rs8064870	MYL4	0	intronic	0.365	5
PD-COPD	rs118136058	17	45349743	T	C	0.0497	NA	0.734104	rs4076453	ITGB3:ITGB3	00:00:00	intronic	4.578	6
PD-COPD	rs150089756	17	45360109	T	C	0.0497	NA	0.734104	rs4076453	ITGB3:ITGB3	00:00:00	intronic	6.108	7
PD-COPD	rs77403156	17	45362346	C	T	0.0497	NA	0.734104	rs4076453	ITGB3:ITGB3	00:00:00	intronic	3.53	5
PD-COPD	rs79166374	17	45362881	G	T	0.0497	NA	0.734104	rs4076453	ITGB3:ITGB3	00:00:00	intronic	0.494	7
PD-COPD	rs13306478	17	45364619	A	G	0.0507	NA	0.753124	rs4076453	ITGB3:ITGB3	00:00:00	intronic	2.582	2b
PD-COPD	rs138385611	17	45365702	G	C	0.0497	NA	0.734104	rs4076453	ITGB3:ITGB3	00:00:00	intronic	13.22	7
PD-COPD	rs16941829	17	45367669	G	A	0.0507	NA	0.753124	rs4076453	ITGB3:ITGB3	00:00:00	intronic	4.64	5
PD-COPD	rs80105155	17	45371765	G	T	0.05567	NA	0.849587	rs4076453	ITGB3:ITGB3	00:00:00	intronic	9.802	4
PD-COPD	rs116906668	17	45371946	C	T	0.05567	NA	0.849587	rs4076453	ITGB3:ITGB3	00:00:00	intronic	0.582	4
PD-COPD	rs113619120	17	45374824	T	C	0.05765	NA	0.821908	rs4076453	ITGB3:ITGB3	00:00:00	intronic	4.675	6
PD-COPD	rs530002159	17	45377708	C	T	0.05467	NA	0.826922	rs4076453	ITGB3:ITGB3	00:00:00	intronic	1.919	NA
PD-COPD	rs184938293	17	45377710	C	T	0.06759	NA	0.691661	rs4076453	ITGB3:ITGB3	00:00:00	intronic	1.068	5
PD-COPD	rs76134103	17	45380964	T	G	0.05567	NA	0.849587	rs4076453	ITGB3:ITGB3:RP11-290H9.4	00:00:00	ncRNA_exonic	2.361	7
PD-COPD	rs16941855	17	45381111	G	A	0.07952	NA	0.601975	rs4076453	ITGB3:ITGB3:RP11-290H9.4	00:00:00	ncRNA_exonic	3.638	7
PD-COPD	rs80030727	17	45381408	A	C	0.05567	NA	0.849587	rs4076453	ITGB3:ITGB3:RP11-290H9.4	00:00:00	ncRNA_intronic	0.945	7
PD-COPD	rs116860178	17	45385518	G	A	0.07952	NA	0.601975	rs4076453	ITGB3:ITGB3:RP11-290H9.4	00:00:00	ncRNA_intronic	0.07	7
PD-COPD	rs16941863	17	45385720	A	G	0.05567	NA	0.849587	rs4076453	ITGB3:ITGB3:RP11-290H9.4	00:00:00	ncRNA_intronic	0.828	6
PD-COPD	rs16941864	17	45388241	C	T	0.05567	NA	0.849587	rs4076453	ITGB3:ITGB3:RP11-290H9.4	00:00:00	ncRNA_intronic	3.701	7
PD-COPD	rs140661797	17	45390449	C	T	0.05567	NA	0.849587	rs4076453	ITGB3:ITGB3:RP11-290H9.4	00:00:00	ncRNA_intronic	2.157	7
PD-COPD	rs143090841	17	45390773	C	T	0.05567	NA	0.849587	rs4076453	ITGB3:ITGB3:RP11-290H9.4	00:00:00	ncRNA_intronic	1.2	6
PD-COPD	rs2873530	17	45397440	C	T	0.05567	NA	0.849587	rs4076453	ITGB3:ITGB3:RP11-290H9.4	00:00:00	ncRNA_intronic	8.724	5
PD-COPD	rs118008523	17	45400433	C	T	0.05368	NA	0.884056	rs4076453	ITGB3:ITGB3:RP11-290H9.4	00:00:00	ncRNA_intronic	1.156	5
PD-COPD	rs147939289	17	45407855	C	A	0.05467	NA	0.941678	rs4076453	ITGB3:ITGB3:EFCAB13	00:00:00	intronic	1.648	7
PD-COPD	rs116968656	17	45421235	A	G	0.05467	NA	0.941678	rs4076453	ITGB3:ITGB3:EFCAB13	00:00:00	intronic	6.048	7
PD-COPD	rs146329589	17	45425556	G	A	0.05467	NA	0.941678	rs4076453	EFCAB13	0	intronic	1.883	6
PD-COPD	rs113969148	17	45425579	C	T	0.05467	NA	0.941678	rs4076453	EFCAB13	0	intronic	0.064	7
PD-COPD	rs78845722	17	45427951	T	G	0.05467	NA	0.941678	rs4076453	EFCAB13	0	intronic	3.882	5
PD-COPD	rs573605739	17	45437621	G	A	0.05467	NA	0.941678	rs4076453	EFCAB13	0	intronic	0.649	NA
PD-COPD	rs147457031	17	45438366	GTTTAA	G	0.05467	NA	0.941678	rs4076453	EFCAB13	0	intronic	10.31	NA
PD-COPD	rs117900456	17	45453358	T	C	0.05467	NA	0.941678	rs4076453	EFCAB13	0	intronic	2.229	6
PD-COPD	rs117092090	17	45457005	G	A	0.05467	NA	0.941678	rs4076453	EFCAB13	0	intronic	0.102	7
PD-COPD	rs117292773	17	45464008	A	C	0.05467	NA	0.941678	rs4076453	EFCAB13	0	intronic	0.197	7
PD-COPD	rs118004742	17	45468858	T	G	0.05467	NA	0.941678	rs4076453	EFCAB13	0	exonic	36	7
PD-COPD	rs116980297	17	45480167	T	A	0.05467	NA	0.941678	rs4076453	EFCAB13	0	intronic	8.701	7
PD-COPD	rs567547131	17	45498621	T	G	0.05467	NA	0.941678	rs4076453	EFCAB13:CTD-2026D20.2	00:00:00	ncRNA_intronic	2.481	NA
PD-COPD	rs189227749	17	45502373	C	T	0.05467	NA	0.941678	rs4076453	EFCAB13	0	intronic	0.657	6
PD-COPD	rs564073682	17	45511680	CA	CAA	0.05567	NA	0.92345	rs4076453	EFCAB13	0	intronic	NA	NA
PD-COPD	rs112967748	17	45511680	CA	C	0.0835	NA	0.92345	rs4076453	EFCAB13	0	intronic	1.165	NA
PD-COPD	rs116951208	17	45514763	C	G	0.05467	NA	0.941678	rs4076453	EFCAB13	0	intronic	0.102	7
PD-COPD	rs184137416	17	45523761	A	G	0.000994	NA	1	rs8064870	MRPL45P2	4172	intergenic	0.43	6
PD-COPD	rs113622764	17	45526655	C	A	0.05567	NA	0.925768	rs4076453	MRPL45P2	1278	intergenic	0.435	6
PD-COPD	rs117213993	17	45542000	A	G	0.05467	NA	0.941678	rs4076453	MRPL45P2	0	ncRNA_intronic	0.137	6
PD-COPD	rs118172145	17	45550604	C	T	0.05467	NA	0.941678	rs4076453	MRPL45P2	0	ncRNA_intronic	0.862	5
PD-COPD	rs142690999	17	45577252	C	T	0.05368	NA	0.960558	rs4076453	MRPL45P2	7393	intergenic	2.898	7
PD-COPD	rs147439994	17	45583688	T	A	0.05765	NA	0.888815	rs4076453	MRPL45P2	13829	intergenic	0.035	6
PD-COPD	rs144690598	17	45590518	A	G	0.05467	NA	0.98043	rs4076453	NPEPPS	9789	intergenic	12.15	7
PD-COPD	rs544500569	17	45598744	C	G	0.05368	NA	1	rs4076453	NPEPPS	1563	intergenic	9.022	NA
PD-COPD	rs147762733	17	45600205	T	C	0.05368	NA	1	rs4076453	NPEPPS	102	upstream	5.042	5
PD-COPD	rs201212390	17	45608885	C	T	0.05368	NA	1	rs4076453	NPEPPS	0	exonic	15.72	4
PD-COPD	rs142232522	17	45613827	C	T	0.05368	NA	1	rs4076453	NPEPPS	0	intronic	0.148	5
PD-COPD	rs139357457	17	45613846	C	A	0.0328	NA	0.600312	rs4076453	NPEPPS	0	intronic	0.989	5
PD-COPD	rs145358525	17	45614039	G	T	0.05368	NA	1	rs4076453	NPEPPS	0	intronic	0.599	7
PD-COPD	rs143600239	17	45614368	C	T	0.05368	NA	1	rs4076453	NPEPPS	0	intronic	1.087	7
PD-COPD	rs141601713	17	45614919	C	T	0.05368	NA	1	rs4076453	NPEPPS	0	intronic	0.394	7
PD-COPD	rs145109538	17	45621330	C	T	0.05368	NA	1	rs4076453	NPEPPS	0	intronic	0.047	7
PD-COPD	rs566418474	17	45631781	G	A	0.05368	NA	1	rs4076453	NPEPPS	0	intronic	9.983	NA
PD-COPD	rs139957447	17	45632639	A	C	0.05368	NA	1	rs4076453	NPEPPS	0	intronic	2.199	6
PD-COPD	rs568947538	17	45634690	C	T	0.05368	NA	1	rs4076453	NPEPPS	0	intronic	7.212	NA
PD-COPD	rs560180833	17	45637109	CTCTTG	C	0.05368	NA	1	rs4076453	NPEPPS	0	intronic	1.197	NA
PD-COPD	rs4060775	17	45639047	G	A	0.05368	NA	1	rs4076453	NPEPPS	0	intronic	6.081	7
PD-COPD	rs3968297	17	45643606	A	T	0.05368	NA	1	rs4076453	NPEPPS	0	intronic	0.905	5
PD-COPD	rs117278327	17	45644891	C	T	0.05368	NA	1	rs4076453	NPEPPS	0	intronic	0.212	2b
PD-COPD	rs117412035	17	45648232	T	G	0.05368	NA	1	rs4076453	NPEPPS	0	intronic	0.987	6
PD-COPD	rs200957509	17	45651309	CTG	C	0.05368	NA	1	rs4076453	NPEPPS	0	intronic	6.405	NA
PD-COPD	rs572165039	17	45655489	AC	A	0.05368	NA	1	rs4076453	NPEPPS	0	intronic	0.685	NA
PD-COPD	rs117282667	17	45656300	T	A	0.05368	NA	1	rs4076453	NPEPPS	0	intronic	6.668	5
PD-COPD	rs186294172	17	45662340	C	T	0.05368	NA	1	rs4076453	NPEPPS	0	intronic	1.288	6
PD-COPD	rs148379754	17	45669878	T	C	0.05368	NA	1	rs4076453	NPEPPS	0	exonic	12.08	5
PD-COPD	rs138544447	17	45673114	C	T	0.05368	NA	1	rs4076453	NPEPPS	0	intronic	0.345	7
PD-COPD	rs78642018	17	45673653	A	C	0.05368	NA	1	rs4076453	NPEPPS	0	intronic	6.731	6
PD-COPD	rs201585783	17	45675682	T	TA	0.05368	NA	1	rs4076453	NPEPPS	0	intronic	1.233	NA
PD-COPD	rs146251838	17	45676397	G	A	0.05368	NA	1	rs4076453	NPEPPS	0	intronic	1.674	6
PD-COPD	rs117485749	17	45676714	A	G	0.05368	NA	1	rs4076453	NPEPPS	0	intronic	11.74	6
PD-COPD	rs138748282	17	45680609	C	A	0.05368	NA	1	rs4076453	NPEPPS	0	intronic	1.623	7
PD-COPD	rs183128642	17	45691348	T	A	0.07853	NA	0.655735	rs4076453	NPEPPS:RP11-580I16.2	00:00:00	ncRNA_intronic	0.415	6
PD-COPD	rs76521704	17	45694248	C	T	0.05368	NA	1	rs4076453	NPEPPS:RP11-580I16.2	00:00:00	ncRNA_intronic	2.732	6
PD-COPD	17:45694877:A:ATT	17	45694877	A	ATT	0.4602	NA	0.980125	rs4076453	NPEPPS:RP11-580I16.2	00:00:00	ncRNA_intronic	1.713	NA
PD-COPD	17:45694877:A:ATTT	17	45694877	A	ATTT	0.05268	NA	0.980125	rs4076453	NPEPPS:RP11-580I16.2	00:00:00	NA	1.671	NA
PD-COPD	rs116722884	17	45694877	A	T	0.006958	NA	0.980125	rs4076453	NPEPPS:RP11-580I16.2	00:00:00	NA	3.775	6
PD-COPD	rs185187727	17	45694998	A	G	0.000994	NA	1	rs8064870	NPEPPS:RP11-580I16.2	00:00:00	ncRNA_intronic	0.277	6
PD-COPD	rs146373465	17	45702884	G	A	0.05368	NA	1	rs4076453	RP11-580I16.2	0	ncRNA_intronic	0.232	5
PD-COPD	rs190285342	17	45704566	C	G	0.05268	NA	0.980125	rs4076453	RP11-580I16.2	0	ncRNA_intronic	0.844	6
PD-COPD	rs546466784	17	45704567	A	AGGC	0.05368	NA	1	rs4076453	RP11-580I16.2	0	ncRNA_intronic	1.94	NA
PD-COPD	rs530556590	17	45704572	G	A	0.05268	NA	0.980125	rs4076453	RP11-580I16.2	0	ncRNA_intronic	0.831	NA
PD-COPD	rs142062775	17	45704615	G	A	0.0507	NA	0.940637	rs4076453	RP11-580I16.2	0	ncRNA_intronic	0.749	7
PD-COPD	rs143055726	17	45704619	A	G	0.0507	NA	0.940637	rs4076453	RP11-580I16.2	0	ncRNA_intronic	1.78	7
PD-COPD	rs148223456	17	45704628	C	T	0.0507	NA	0.940637	rs4076453	RP11-580I16.2	0	ncRNA_intronic	0.341	6
PD-COPD	rs141132433	17	45704631	A	G	0.0507	NA	0.940637	rs4076453	RP11-580I16.2	0	ncRNA_intronic	2.413	6
PD-COPD	rs117086041	17	45705019	G	A	0.05368	NA	1	rs4076453	RP11-580I16.2	0	ncRNA_intronic	1.482	6
PD-COPD	rs148858018	17	45709463	C	T	0.05368	NA	1	rs4076453	RP11-580I16.2	0	ncRNA_intronic	0.01	7
PD-COPD	rs148442642	17	45719755	C	T	0.05368	NA	1	rs4076453	RP11-580I16.2	0	ncRNA_intronic	1.173	7
PD-COPD	rs118174036	17	45720578	G	A	0.05368	NA	1	rs4076453	RP11-580I16.2	0	ncRNA_intronic	1.556	5
PD-COPD	rs118096338	17	45721010	T	C	0.05368	NA	1	rs4076453	RP11-580I16.2	0	ncRNA_intronic	1.316	5
PD-COPD	rs150786673	17	45723022	A	C	0.05368	NA	1	rs4076453	RP11-580I16.2	0	ncRNA_intronic	0.932	7
PD-COPD	rs201776290	17	45724627	G	GT	0.05368	NA	1	rs4076453	RP11-580I16.2	0	ncRNA_intronic	0.977	NA
PD-COPD	rs78091539	17	45726150	G	A	0.05368	NA	1	rs4076453	RP11-580I16.2	0	ncRNA_intronic	2.516	3a
PD-COPD	rs79047800	17	45727045	T	G	0.05368	NA	1	rs4076453	KPNB1	0	UTR5	5.303	4
PD-COPD	rs74737283	17	45738008	G	C	0.05368	NA	1	rs4076453	KPNB1	0	intronic	8.694	5
PD-COPD	rs16956009	17	45742691	C	G	0.05368	NA	1	rs4076453	KPNB1	0	intronic	12.26	4
PD-COPD	rs76958296	17	45742757	C	A	0.05368	NA	1	rs4076453	KPNB1	0	intronic	6.526	4
PD-COPD	rs115736925	17	45746683	C	T	0.05368	NA	1	rs4076453	KPNB1	0	intronic	0.404	5
PD-COPD	rs141225663	17	45749537	A	G	0.05368	NA	1	rs4076453	KPNB1	0	intronic	3.576	5
PD-COPD	rs556614389	17	45749672	C	CA	0.05666	NA	0.903549	rs4076453	KPNB1	0	intronic	3.446	NA
PD-COPD	rs556752509	17	45752750	T	G	0.05368	NA	1	rs4076453	KPNB1	0	intronic	0.632	NA
PD-COPD	rs201856760	17	45752751	G	T	0.05368	NA	1	rs4076453	KPNB1	0	intronic	1.159	5
PD-COPD	rs113566262	17	45766983	A	G	0.05368	NA	1	rs4076453	KPNB1	4111	intergenic	0.974	7
PD-COPD	rs79603396	17	45773858	G	A	0.05368	NA	1	rs4076453	TBKBP1	0	intronic	0.073	5
PD-COPD	rs117191081	17	45777730	C	T	0.05368	NA	1	rs4076453	TBKBP1	0	intronic	3.133	5
PD-COPD	rs4076453	17	45778237	A	G	0.05368	7.67304e-16	1	rs4076453	TBKBP1	0	intronic	1.443	5
PD-COPD	rs117626754	17	45779066	C	G	0.05368	NA	1	rs4076453	TBKBP1	0	intronic	10.99	4
PD-COPD	rs117552358	17	45783732	A	G	0.05368	NA	1	rs4076453	TBKBP1	0	intronic	2.922	5
PD-COPD	rs117010008	17	45784089	G	A	0.05368	NA	1	rs4076453	TBKBP1	0	intronic	1.617	4
PD-COPD	rs117844835	17	45785123	G	A	0.05368	NA	1	rs4076453	TBKBP1	0	intronic	0.462	5
PD-COPD	rs185938851	17	45786166	C	T	0.05368	NA	1	rs4076453	TBKBP1	0	exonic	17.68	5
PD-COPD	rs77176822	17	45787422	C	T	0.05368	NA	1	rs4076453	TBKBP1	0	intronic	3.219	5
PD-COPD	rs76004009	17	45789316	G	A	0.05368	NA	1	rs4076453	TBKBP1	0	UTR3	1.468	5
PD-COPD	rs77611269	17	45790815	C	T	0.05368	NA	1	rs4076453	TBKBP1	1398	intergenic	0.038	5
PD-COPD	rs79007830	17	45793349	G	A	0.07555	NA	0.673825	rs4076453	TBKBP1	3932	intergenic	12.08	2b
PD-COPD	rs77459045	17	45814684	G	A	0.000994	NA	1	rs8064870	TBX21	0	intronic	18.24	5
PD-COPD	rs8064870	17	45849423	T	C	0.000994	1.39788e-14	1	rs8064870	TBX21	25937	intergenic	2.447	7
PD-COPD	rs563590563	17	46005463	C	T	0.000994	NA	1	rs8064870	SP2:AC003665.1	00:00:00	ncRNA_intronic	18.32	NA
PD-COPD	rs542605134	17	46042544	G	A	0.000994	NA	1	rs8064870	RP11-6N17.9	0	ncRNA_intronic	0.432	NA
PD-COPD	rs11650165	17	71113477	C	T	0.00497	4.06592e-06	1	rs11650165	SLC39A11	24625	intergenic	1.449	5
PD-IPF	rs533898671	11	326953	G	A	0.000994	NA	1	rs55771420	IFITM3	0	intronic	1.579	NA
PD-IPF	rs564072867	11	398806	C	T	0.000994	NA	1	rs55771420	PKP3	0	intronic	0.745	NA
PD-IPF	rs530956101	11	496670	AAAAC	A	0.000994	NA	1	rs55771420	RNH1	0	intronic	1.038	NA
PD-IPF	rs577583370	11	585918	A	G	0.000994	NA	1	rs55771420	PHRF1	0	intronic	4.057	NA
PD-IPF	rs546097276	11	705336	C	A	0.000994	NA	1	rs55771420	DEAF1:EPS8L2	00:00:00	UTR5	0.735	NA
PD-IPF	rs542293024	11	817599	C	A	0.000994	NA	1	rs55771420	PNPLA2	1302	intergenic	1.546	NA
PD-IPF	rs527344487	11	862240	C	T	0.000994	NA	1	rs55771420	TSPAN4	0	intronic	3.565	NA
PD-IPF	rs528432359	11	906715	C	T	0.000994	NA	1	rs55771420	CHID1	0	intronic	0.021	NA
PD-IPF	rs541928095	11	935428	A	ACC	0.00994	NA	0.806353	rs189734031	AP2A2	0	intronic	0.535	NA
PD-IPF	rs189734031	11	983605	G	C	0.00994	4.27426e-07	1	rs189734031	AP2A2	0	intronic	10.24	2b
PD-IPF	rs537895363	11	984479	G	A	0.000994	NA	1	rs55771420	AP2A2	0	intronic	1.417	NA
PD-IPF	rs139164549	11	992998	C	T	0.000994	NA	1	rs55771420	AP2A2	0	intronic	11.81	5
PD-IPF	rs148989610	11	1023824	G	A	0.01093	1.21186e-05	0.731223	rs189734031	MUC6	0	intronic	0.723	5
PD-IPF	rs117556376	11	1057787	T	C	0.00994	6.65869e-07	0.633526	rs189734031	RP13-870H17.3	2502	intergenic	2.239	4
PD-IPF	rs556112793	11	1231061	A	T	0.000994	NA	1	rs55771420	MUC5AC	8696	intergenic	4.817	NA
PD-IPF	rs541814548	11	1231093	C	G	0.000994	NA	1	rs55771420	MUC5AC	8728	intergenic	1.428	NA
PD-IPF	rs55771420	11	1233760	G	A	0.000994	3.17445e-06	1	rs55771420	MUC5B	10535	intergenic	5.863	5
PD-IPF	rs554695326	11	1307667	A	G	0.000994	NA	1	rs55771420	TOLLIP	0	intronic	6.787	NA
PD-IPF	rs574693504	11	1375256	C	G	0.000994	NA	1	rs55771420	BRSK2	35872	intergenic	0.884	NA
PD-IPF	rs551035463	11	1376317	C	G	0.000994	NA	1	rs55771420	BRSK2	34811	intergenic	0.63	NA
PD-IPF	rs528338980	11	1388753	G	A	0.000994	NA	1	rs55771420	BRSK2	22375	intergenic	0.242	NA
PD-IPF	rs546032403	11	1499891	G	A	0.000994	NA	1	rs55771420	MOB2	0	intronic	0.067	NA
PD-IPF	rs534197229	11	1585732	C	T	0.000994	NA	1	rs55771420	DUSP8	0	intronic	8.99	NA
PD-IPF	rs559193961	11	1664181	C	T	0.000994	NA	1	rs55771420	KRTAP5-5	12020	intergenic	3.465	NA
PD-IPF	rs547646659	11	1816444	G	T	0.000994	NA	1	rs55771420	RPL36AP39	2343	intergenic	0.827	NA
PD-IPF	rs185815467	11	1829071	G	A	0.000994	NA	1	rs55771420	AC139143.2	3745	intergenic	2.699	3a
PD-IPF	rs143667502	17	15254741	G	A	0.000994	NA	1	rs21180	TEKT3	9782	intergenic	1.348	3a
PD-IPF	rs575617154	17	15947376	G	A	0.000994	NA	1	rs21180	TTC19:NCOR1	00:00:00	intronic	0.075	NA
PD-IPF	rs537679516	17	15963608	C	T	0.000994	NA	1	rs21180	NCOR1	0	intronic	3.258	NA
PD-IPF	rs21180	17	16184694	C	T	0.000994	1.52473e-08	1	rs21180	PIGL	0	intronic	4.168	NA
PD-IPF	rs572839613	17	16344444	G	A	0.000994	NA	1	rs21180	FAM211A-AS1	0	ncRNA_exonic	11.45	NA
PD-IPF	rs567561959	17	16718325	C	G	0.000994	NA	1	rs21180	RP11-219A15.4	0	ncRNA_intronic	1.11	NA
PD-IPF	rs568349423	17	16757938	C	T	0.000994	NA	1	rs21180	COTL1P1	314	downstream	2.87	NA
PD-IPF	rs544960503	17	16787404	G	A	0.000994	NA	1	rs21180	RP1-48J14.1	9107	intergenic	3.07	NA
PD-IPF	rs528620052	17	16809809	A	G	0.000994	NA	1	rs21180	RP1-48J14.1	13065	intergenic	1.35	NA
PD-IPF	rs138611565	17	16860006	T	C	0.000994	NA	1	rs21180	TNFRSF13B	0	intronic	3.913	5
PD-IPF	rs527688264	17	16885825	C	T	0.000994	NA	1	rs21180	AC104024.1	1157	intergenic	7.527	NA
PD-IPF	rs149698604	17	17016149	C	G	0.000994	NA	1	rs21180	MPRIP	0	intronic	3.908	5
PD-OSA	rs146403228	12	64543408	T	C	0.003976	NA	0.248506	rs10784465	RP11-196H14.3	1770	intergenic	2.807	5
PD-OSA	rs183515968	12	64555648	A	G	0.000994	NA	1	rs10784465	RP11-196H14.3	14010	intergenic	2.13	6
PD-OSA	rs556906898	12	64657264	C	T	0.000994	NA	1	rs10784465	RPS11P6	0	ncRNA_intronic	0.162	NA
PD-OSA	rs141204014	12	64809987	G	T	0.001988	NA	0.499004	rs10784465	XPOT	0	intronic	1.925	5
PD-OSA	rs193206578	12	64921397	C	T	0.000994	NA	1	rs10784465	RP11-439H13.2	0	ncRNA_intronic	0.219	7
PD-OSA	rs187917135	12	64987158	T	C	0.000994	NA	1	rs10784465	RP11-338E21.1	5699	intergenic	12.34	7
PD-OSA	rs184007854	12	65113650	C	G	0.000994	NA	1	rs10784465	GNS	0	intronic	7.539	6
PD-OSA	rs148376807	12	65215526	A	G	0.002982	NA	0.332005	rs10784465	TBC1D30	0	intronic	6.534	2b
PD-OSA	rs139287779	12	65250388	T	C	0.003976	NA	0.248506	rs10784465	TBC1D30	0	intronic	11.63	5
PD-OSA	rs181934781	12	65366776	C	T	0.000994	NA	1	rs10784465	RP11-766N7.3:RP11-766N7.4	00:00:00	ncRNA_intronic	0.266	6
PD-OSA	rs191017766	12	65455948	G	T	0.001988	NA	0.499004	rs10784465	WIF1	0	intronic	2.935	7
PD-OSA	rs138186981	12	65466325	A	G	0.003976	NA	0.248506	rs10784465	WIF1	0	intronic	6.392	7
PD-OSA	rs10784465	12	65488756	A	G	0.000994	2.26516e-06	1	rs10784465	WIF1	0	intronic	0.253	6
PD-OSA	rs148373446	12	65538719	G	A	0.003976	NA	0.248506	rs10784465	APOOP3	9665	intergenic	1.303	7
PD-OSA	rs540703218	12	65746043	AC	A	0.002982	NA	0.332005	rs10784465	MSRB3	0	intronic	0.435	NA
PD-OSA	rs186012524	12	65787229	C	T	0.000994	NA	1	rs10784465	MSRB3	0	intronic	1.081	7
PD-OSA	rs550761433	12	66062068	C	G	0.000994	NA	1	rs10784465	RP11-221N13.4	4988	intergenic	0.095	NA
PD-OSA	rs146395516	12	66064433	T	G	0.001988	NA	0.499004	rs10784465	RP11-221N13.4	7353	intergenic	1.799	6
PD-OSA	rs185428121	12	66065297	A	G	0.000994	NA	1	rs10784465	RP11-221N13.4	8217	intergenic	7.004	7
PD-OSA	rs189697423	12	66176115	T	C	0.002982	NA	0.332005	rs10784465	RPSAP52	0	ncRNA_intronic	9.321	6
PD-OSA	rs113330961	12	66201474	C	T	0.000994	NA	1	rs10784465	RPSAP52	0	ncRNA_intronic	0.376	5
PD-OSA	rs184494718	12	66237980	T	C	0.002982	NA	0.332005	rs10784465	HMGA2	0	intronic	1.585	5
PD-OSA	rs185452683	12	66246400	C	G	0.002982	NA	0.332005	rs10784465	HMGA2:RP11-366L20.2	00:00:00	intronic	1.237	6
PD-OSA	rs138680587	12	66253863	C	A	0.002982	NA	0.332005	rs10784465	HMGA2:RP11-366L20.2	00:00:00	exonic	17.07	7
PD-OSA	rs190357725	12	66254019	G	A	0.002982	NA	0.332005	rs10784465	HMGA2:RP11-366L20.2	00:00:00	intronic	0.373	4
PD-OSA	rs565561512	12	66372016	C	G	0.000994	NA	1	rs10784465	HMGA2	11940	intergenic	7.321	NA
PD-OSA	rs553022189	12	66415655	G	A	0.000994	NA	1	rs10784465	RP11-366L20.4	5849	intergenic	0.528	NA
PD-OSA	rs554559475	12	66451248	T	C	0.003976	NA	0.248506	rs10784465	RNA5SP362	8752	intergenic	6.094	NA
PD-OSA	rs546319540	17	44878248	C	T	0.000994	NA	1	rs8064870	WNT3	0	intronic	7.191	NA
PD-OSA	rs548021887	17	45108572	G	C	0.002982	NA	0.332005	rs8064870	RP11-156P1.2:LRRC37A17P:RP11-156P1.3	00:00:00	ncRNA_intronic	12.25	NA
PD-OSA	rs182878428	17	45189828	A	T	0.000994	NA	1	rs8064870	CDC27	5240	intergenic	3.88	7
PD-OSA	rs190370602	17	45278736	T	G	0.000994	NA	1	rs8064870	MYL4	0	intronic	0.365	5
PD-OSA	rs183615111	17	45473144	C	G	0.001988	NA	0.499004	rs8064870	EFCAB13	0	intronic	0.548	7
PD-OSA	rs184152107	17	45480516	A	T	0.001988	NA	0.499004	rs8064870	EFCAB13	0	intronic	3.8	7
PD-OSA	rs184137416	17	45523761	A	G	0.000994	NA	1	rs8064870	MRPL45P2	4172	intergenic	0.43	6
PD-OSA	rs557704176	17	45594349	A	G	0.001988	NA	0.499004	rs8064870	NPEPPS	5958	intergenic	1.539	NA
PD-OSA	rs185187727	17	45694998	A	G	0.000994	NA	1	rs8064870	NPEPPS:RP11-580I16.2	00:00:00	ncRNA_intronic	0.277	6
PD-OSA	rs554238103	17	45719512	G	T	0.002982	NA	0.332005	rs8064870	RP11-580I16.2	0	ncRNA_intronic	0.824	NA
PD-OSA	rs138737234	17	45742193	A	G	0.002982	NA	0.332005	rs8064870	KPNB1	0	intronic	1.705	5
PD-OSA	rs572625136	17	45781745	G	A	0.001988	NA	0.499004	rs8064870	TBKBP1	0	intronic	10.31	NA
PD-OSA	rs77459045	17	45814684	G	A	0.000994	NA	1	rs8064870	TBX21	0	intronic	18.24	5
PD-OSA	rs8064870	17	45849423	T	C	0.000994	3.68539e-12	1	rs8064870	TBX21	25937	intergenic	2.447	7
PD-OSA	rs563590563	17	46005463	C	T	0.000994	NA	1	rs8064870	SP2:AC003665.1	00:00:00	ncRNA_intronic	18.32	NA
PD-OSA	rs542605134	17	46042544	G	A	0.000994	NA	1	rs8064870	RP11-6N17.9	0	ncRNA_intronic	0.432	NA
PD-OSA	rs9611346	22	40820516	G	A	0.03082	NA	0.28636	rs9623320	MKL1	0	intronic	0.603	5
PD-OSA	rs80207320	22	40822149	A	G	0.0328	NA	0.277101	rs9623320	MKL1	0	intronic	0.298	6
PD-OSA	rs56038415	22	40824160	TG	T	0.0328	NA	0.265006	rs9623320	MKL1	0	intronic	0.109	NA
PD-OSA	rs201665174	22	40883996	TCA	T	0.01093	NA	0.233232	rs9623320	MKL1	0	intronic	6.775	NA
PD-OSA	rs145310892	22	40906067	TG	T	0.03181	NA	0.230534	rs9623320	MKL1	0	intronic	3.554	NA
PD-OSA	rs9607730	22	40971703	T	C	0.0338	NA	0.267508	rs9623320	MKL1	0	intronic	6.618	6
PD-OSA	rs9611375	22	40989641	G	A	0.0338	NA	0.267508	rs9623320	MKL1	0	intronic	5.357	4
PD-OSA	rs9607732	22	40990077	A	G	0.0338	NA	0.267508	rs9623320	MKL1	0	intronic	7.429	4
PD-OSA	rs113811130	22	41000357	A	G	0.0338	NA	0.267508	rs9623320	MKL1	0	intronic	1.731	5
PD-OSA	rs78463154	22	41018680	G	A	0.0338	NA	0.267508	rs9623320	MKL1	0	intronic	2.124	6
PD-OSA	rs9611382	22	41035231	G	C	0.0338	NA	0.267508	rs9623320	MKL1	2524	intergenic	10.83	5
PD-OSA	rs9611386	22	41078533	A	G	0.0338	NA	0.358521	rs9623320	MCHR1	0	UTR3	9.598	5
PD-OSA	rs882111	22	41081227	G	T	0.04374	NA	1	rs9623320	MCHR1	2408	intergenic	1.749	NA
PD-OSA	rs9623320	22	41082478	G	A	0.04374	5.66705e-06	1	rs9623320	MCHR1	3659	intergenic	0.033	7
PD-OSA	rs11090023	22	41083239	A	G	0.04473	NA	0.975648	rs9623320	MCHR1	4420	intergenic	0.08	7
PD-OSA	rs9611389	22	41084124	A	T	0.04374	NA	1	rs9623320	MCHR1	5305	intergenic	1.469	6
PD-OSA	rs141716304	22	41084937	G	A	0.02386	NA	0.52268	rs9623320	MCHR1	6118	intergenic	0.902	7
PD-OSA	rs28415047	22	41087264	C	T	0.04473	NA	0.975648	rs9623320	MCHR1	8445	intergenic	0.888	5
PD-OSA	rs7291793	22	41089707	T	C	0.1879	NA	0.220832	rs9623320	MCHR1	10888	intergenic	3.31	6
PD-OSA	rs9611391	22	41092110	G	A	0.03976	NA	0.901237	rs9623320	MCHR1	13291	intergenic	4.382	4
PD-OSA	rs7284739	22	41093049	A	G	0.04175	NA	0.853801	rs9623320	MCHR1	14230	intergenic	2.031	7
PD-OSA	rs9611394	22	41094618	G	A	0.04573	NA	0.771304	rs9623320	MCHR1	15799	intergenic	3.923	6
PD-OSA	rs111562447	22	41095599	C	G	0.04573	NA	0.771304	rs9623320	MCHR1	16780	intergenic	1.049	6
PD-OSA	rs9611395	22	41100038	T	C	0.04573	NA	0.771304	rs9623320	MCHR1	21219	intergenic	4.471	5
PD-OSA	rs558121633	22	41108613	CT	C	0.07058	NA	0.399644	rs9623320	MCHR1	29794	intergenic	1.611	NA
PD-OSA	rs148364401	22	41111707	T	TTG	0.04573	NA	0.771304	rs9623320	MCHR1	32888	intergenic	3.82	NA
PD-OSA	rs9611397	22	41112532	A	C	0.04573	NA	0.771304	rs9623320	MCHR1	33713	intergenic	2.527	7
PD-OSA	rs111674281	22	41113053	T	G	0.04573	NA	0.771304	rs9623320	MCHR1	34234	intergenic	7.358	6
PD-OSA	rs542787116	22	41116610	CT	C	0.1024	NA	0.375519	rs9623320	MCHR1	37791	intergenic	1.407	NA
PD-OSA	rs55714854	22	41118239	C	T	0.04573	NA	0.771304	rs9623320	MCHR1	39420	intergenic	0.777	5
PD-OSA	rs6002064	22	41118340	G	A	0.04573	NA	0.771304	rs9623320	MCHR1	39521	intergenic	0.135	7
PD-OSA	rs139410731	22	41120339	C	T	0.04473	NA	0.747319	rs9623320	MCHR1	41520	intergenic	2.748	6
PD-OSA	rs9611399	22	41123738	C	T	0.04473	NA	0.747319	rs9623320	SLC25A17	41895	intergenic	15.7	5
PD-OSA	rs2038340	22	41124650	T	C	0.04573	NA	0.729022	rs9623320	SLC25A17	40983	intergenic	1.071	5
PD-OSA	rs2038341	22	41124730	G	A	0.04473	NA	0.747319	rs9623320	SLC25A17	40903	intergenic	6.56	4
PD-OSA	rs55690923	22	41130755	G	C	0.04473	NA	0.747319	rs9623320	SLC25A17	34878	intergenic	1.889	5
PD-OSA	rs138329620	22	41131096	C	T	0.02286	NA	0.499858	rs9623320	SLC25A17	34537	intergenic	1.932	7
PD-OSA	rs143551474	22	41137913	G	A	0.02286	NA	0.499858	rs9623320	SLC25A17	27720	intergenic	12.85	7
PD-OSA	rs9611405	22	41138775	C	A	0.04473	NA	0.747319	rs9623320	SLC25A17	26858	intergenic	6.168	6
PD-OSA	rs9611406	22	41138784	C	T	0.04473	NA	0.747319	rs9623320	SLC25A17	26849	intergenic	3.734	6
PD-OSA	rs565224784	22	41140633	C	T	0.04672	NA	0.711503	rs9623320	SLC25A17	25000	intergenic	3.494	NA
PD-OSA	rs117977489	22	41143268	G	A	0.04473	NA	0.747319	rs9623320	SLC25A17	22365	intergenic	6.727	7
PD-OSA	rs5995941	22	41144917	C	T	0.04573	NA	0.729022	rs9623320	SLC25A17	20716	intergenic	0.514	4
PD-OSA	rs9611416	22	41189505	T	A	0.04374	NA	0.641205	rs9623320	SLC25A17	0	intronic	3.379	7
PD-OSA	22:41213759:A:T	22	41213759	A	T	0.03082	NA	0.464346	rs9623320	SLC25A17	0	intronic	6.794	NA
PD-OSA	rs5758092	22	41215183	A	G	0.03976	NA	0.588712	rs9623320	SLC25A17	0	intronic	13.76	4
PD-OSA	rs5758093	22	41216028	A	G	0.04374	NA	0.601938	rs9623320	SLC25A17	624	upstream	3.833	4
PD-OSA	rs5750995	22	41216037	C	A	0.04374	NA	0.601938	rs9623320	SLC25A17	633	upstream	1.245	4
PD-OSA	rs6002167	22	41216746	A	T	0.04274	NA	0.618054	rs9623320	SLC25A17	1342	intergenic	1.253	4
PD-OSA	rs6002169	22	41217310	C	T	0.04274	NA	0.618054	rs9623320	SLC25A17	1906	intergenic	2.733	5
PD-OSA	rs66534850	22	41218848	TA	T	0.04374	NA	0.601938	rs9623320	ST13	1690	intergenic	1.273	NA
PD-OSA	rs71328752	22	41219139	A	ATTT	0.04374	NA	0.601938	rs9623320	ST13	1399	intergenic	0.525	NA
PD-OSA	rs9607747	22	41219687	T	C	0.04274	NA	0.618054	rs9623320	ST13	851	downstream	2.394	5
PD-OSA	rs3044599	22	41222904	G	GCTA	0.04573	NA	0.571809	rs9623320	ST13	0	intronic	1.11	NA
PD-OSA	rs6002171	22	41223859	G	A	0.04573	NA	0.571809	rs9623320	ST13	0	intronic	4.615	7
PD-OSA	rs5750998	22	41229149	C	T	0.04573	NA	0.571809	rs9623320	ST13	0	intronic	0.241	7
PD-OSA	rs6002173	22	41230238	T	A	0.04573	NA	0.571809	rs9623320	ST13	0	intronic	3.313	7
PD-OSA	rs1807677	22	41232298	A	C	0.04175	NA	0.634938	rs9623320	ST13	0	intronic	2.248	5
PD-OSA	rs739272	22	41232594	T	C	0.04573	NA	0.571809	rs9623320	ST13	0	intronic	2.613	7
PD-OSA	rs35102140	22	41232774	T	TA	0.04175	NA	0.634938	rs9623320	ST13	0	intronic	1.066	NA
PD-OSA	rs5750999	22	41233479	C	T	0.04175	NA	0.634938	rs9623320	ST13	0	intronic	0.454	7
PD-OSA	rs5758104	22	41235639	C	T	0.04175	NA	0.634938	rs9623320	ST13	0	intronic	0.165	7
PD-OSA	rs1573745	22	41240835	G	A	0.04076	NA	0.611756	rs9623320	ST13	0	intronic	3.134	7
PD-OSA	rs9607748	22	41242026	T	C	0.04175	NA	0.634938	rs9623320	ST13	0	intronic	4.278	5
PD-OSA	rs567831130	22	41243382	C	CA	0.07058	NA	0.36245	rs9623320	ST13	0	intronic	1.718	NA
PD-OSA	rs6002179	22	41245457	C	G	0.04175	NA	0.634938	rs9623320	ST13	0	intronic	2.167	7
PD-OSA	rs5995958	22	41246023	C	T	0.04573	NA	0.571809	rs9623320	ST13	0	intronic	0.589	7
PD-OSA	rs6002180	22	41246211	G	A	0.04175	NA	0.634938	rs9623320	ST13	0	intronic	2.497	7
PD-OSA	rs2266787	22	41246952	C	T	0.04573	NA	0.571809	rs9623320	ST13	0	intronic	1.864	NA
PD-OSA	rs5758106	22	41247243	C	T	0.04573	NA	0.571809	rs9623320	ST13	0	intronic	0.184	7
PD-OSA	rs5758107	22	41248080	C	T	0.04573	NA	0.571809	rs9623320	ST13	0	intronic	3.572	5
PD-OSA	rs35800717	22	41248384	T	C	0.04175	NA	0.634938	rs9623320	ST13	0	intronic	6.342	5
PD-OSA	rs6002181	22	41248505	A	G	0.04573	NA	0.571809	rs9623320	ST13	0	intronic	0.412	5
PD-OSA	rs5751002	22	41250134	CAT	GAT	0.04573	NA	0.571809	rs9623320	ST13	0	intronic	NA	NA
PD-OSA	rs5758108	22	41250439	G	T	0.04175	NA	0.634938	rs9623320	ST13	0	intronic	3.36	5
PD-OSA	rs6002182	22	41258144	A	G	0.04573	NA	0.571809	rs9623320	XPNPEP3	0	intronic	10.24	7
PD-OSA	rs6002183	22	41260846	C	G	0.04175	NA	0.634938	rs9623320	XPNPEP3	0	intronic	4.518	7
PD-OSA	rs9611427	22	41262103	A	G	0.04175	NA	0.634938	rs9623320	XPNPEP3	0	intronic	0.869	7
PD-OSA	rs35513572	22	41264432	C	CGT	0.04573	NA	0.571809	rs9623320	XPNPEP3	0	intronic	0.687	NA
PD-OSA	rs9611429	22	41270730	G	A	0.04175	NA	0.634938	rs9623320	XPNPEP3	0	intronic	0.339	7
PD-OSA	rs9607751	22	41275124	A	C	0.04175	NA	0.634938	rs9623320	XPNPEP3	0	intronic	9.914	5
PD-OSA	rs13056402	22	41292821	C	T	0.02485	NA	0.454127	rs9623320	XPNPEP3	0	intronic	0.265	5
PD-OSA	rs71325197	22	41293117	G	C	0.04175	NA	0.634938	rs9623320	XPNPEP3	0	intronic	4.999	5
PD-OSA	rs13058509	22	41296411	C	A	0.03678	NA	0.643648	rs9623320	XPNPEP3	0	intronic	3.155	7
PD-OSA	rs5758124	22	41298138	G	A	0.04672	NA	0.557707	rs9623320	XPNPEP3	0	intronic	0.046	7
PD-OSA	rs34710289	22	41298977	A	G	0.04175	NA	0.634938	rs9623320	XPNPEP3	0	intronic	1.2	5
PD-OSA	rs13055690	22	41300370	A	G	0.01491	NA	0.32065	rs9623320	XPNPEP3	0	intronic	0.214	5
PD-OSA	rs5751007	22	41306960	C	T	0.04175	NA	0.634938	rs9623320	XPNPEP3	0	intronic	3.76	7
PD-OSA	rs35545306	22	41309430	A	C	0.01491	NA	0.32065	rs9623320	XPNPEP3	0	intronic	1.814	7
PD-OSA	rs13058395	22	41310063	T	C	0.04175	NA	0.634938	rs9623320	XPNPEP3	0	intronic	2.769	7
PD-OSA	rs6002199	22	41312350	A	G	0.04573	NA	0.571809	rs9623320	XPNPEP3	0	intronic	0.736	7
PD-OSA	rs9607755	22	41313843	A	T	0.04175	NA	0.634938	rs9623320	XPNPEP3:RNU6-379P	00:00:00	ncRNA_exonic	2.746	6
PD-OSA	rs9607756	22	41314002	G	T	0.04175	NA	0.634938	rs9623320	XPNPEP3	0	intronic	0.349	7
PD-OSA	rs35188123	22	41314246	C	T	0.04175	NA	0.634938	rs9623320	XPNPEP3	0	intronic	1.875	5
PD-OSA	rs71328630	22	41321894	G	A	0.04175	NA	0.634938	rs9623320	XPNPEP3	0	intronic	4.523	7
PD-OSA	rs75078102	22	41321896	A	G	0.04175	NA	0.634938	rs9623320	XPNPEP3	0	intronic	5.047	7
PD-OSA	rs9611437	22	41325790	C	T	0.04076	NA	0.611756	rs9623320	XPNPEP3	0	UTR3	5.626	5
PD-OSA	rs9611438	22	41327000	G	A	0.04076	NA	0.611756	rs9623320	XPNPEP3	0	UTR3	0.976	6
PD-OSA	rs6002206	22	41342438	T	C	0.04076	NA	0.611756	rs9623320	XPNPEP3	0	intronic	0.19	5
PD-OSA	rs5995968	22	41345806	G	A	0.04175	NA	0.595048	rs9623320	XPNPEP3	0	intronic	3.225	7
PD-OSA	rs34654213	22	41347346	G	T	0.01491	NA	0.32065	rs9623320	XPNPEP3	0	intronic	11.68	2b
PD-OSA	rs6002207	22	41347813	G	A	0.04076	NA	0.611756	rs9623320	XPNPEP3:RBX1	00:00:00	intronic	12.52	2a
PD-OSA	rs67482133	22	41350338	GT	G	0.04473	NA	0.549383	rs9623320	XPNPEP3:RBX1	00:00:00	intronic	0.46	NA
PD-OSA	rs6002208	22	41351793	C	T	0.04076	NA	0.611756	rs9623320	XPNPEP3:RBX1	00:00:00	intronic	3.545	3a
PD-OSA	rs75270024	22	41355334	G	A	0.04076	NA	0.611756	rs9623320	XPNPEP3:RBX1	00:00:00	intronic	7.825	7
PD-OSA	rs5751014	22	41358092	A	T	0.04473	NA	0.549383	rs9623320	XPNPEP3:RBX1	00:00:00	intronic	2.576	6
PD-OSA	rs5995972	22	41358893	T	G	0.07753	NA	0.312236	rs9623320	XPNPEP3:RBX1	00:00:00	intronic	1.539	7
PD-OSA	rs9611443	22	41359704	A	G	0.04076	NA	0.611756	rs9623320	XPNPEP3:RBX1	00:00:00	intronic	2.024	6
PD-OSA	rs5995973	22	41362158	G	C	0.04076	NA	0.611756	rs9623320	XPNPEP3:RBX1	00:00:00	intronic	11.5	4
PD-OSA	rs5995974	22	41367912	A	G	0.04076	NA	0.611756	rs9623320	RBX1	0	intronic	5.216	6
PD-OSA	rs9611446	22	41370381	G	A	0.04076	NA	0.611756	rs9623320	RBX1	1067	intergenic	3.579	6
PD-OSA	rs113784934	22	41377326	G	A	0.04473	NA	0.549383	rs9623320	RBX1	8012	intergenic	3.126	7
PD-OSA	rs28500583	22	41379103	G	A	0.04076	NA	0.611756	rs9623320	RBX1	9789	intergenic	3.95	4
PD-OSA	rs6002215	22	41380192	A	G	0.04076	NA	0.611756	rs9623320	RBX1	10878	intergenic	8.97	7
PD-OSA	rs6002217	22	41381251	G	A	0.04076	NA	0.611756	rs9623320	RBX1	11937	intergenic	2.465	5
PD-OSA	rs5995976	22	41383868	C	T	0.04076	NA	0.611756	rs9623320	RBX1	14554	intergenic	0.049	6
PD-OSA	rs35841141	22	41386451	A	G	0.04374	NA	0.563912	rs9623320	RBX1	17137	intergenic	1.796	5
PD-OSA	rs35897073	22	41389825	G	A	0.04374	NA	0.527127	rs9623320	RBX1	20511	intergenic	0.043	6
PD-OSA	rs9611451	22	41391374	C	T	0.04374	NA	0.527127	rs9623320	RBX1	22060	intergenic	0.123	7
PD-OSA	rs5995978	22	41393926	G	T	0.04274	NA	0.505045	rs9623320	RBX1	24612	intergenic	0.88	6
PD-OSA	rs570041555	22	41397999	CT	C	0.06958	NA	0.321195	rs9623320	RBX1	28685	intergenic	9.858	NA
PD-OSA	rs743002	22	41404939	T	C	0.05368	NA	0.413121	rs9623320	RBX1	35625	intergenic	8.22	6
PD-OSA	rs761702	22	41404970	G	A	0.05368	NA	0.413121	rs9623320	RBX1	35656	intergenic	0.017	6
PD-OSA	rs34780507	22	41405753	A	G	0.05368	NA	0.413121	rs9623320	Y_RNA	35747	intergenic	13.64	2b
PD-OSA	rs71327105	22	41410124	T	G	0.05666	NA	0.386731	rs9623320	Y_RNA	31376	intergenic	9.023	5
PD-OSA	rs34213429	22	41499226	G	A	0.01392	NA	0.298661	rs9623320	EP300	0	intronic	1.263	5
PD-OSA	rs34016471	22	41565246	G	A	0.01392	NA	0.298661	rs9623320	EP300:RP1-85F18.6	00:00:00	ncRNA_exonic	2.325	7
PD-OSA	rs184845755	22	41611689	C	T	0.01392	NA	0.298661	rs9623320	L3MBTL2:RP4-756G23.5	00:00:00	ncRNA_intronic	4.612	3a
PD-OSA	rs572899344	22	41611717	C	T	0.01392	NA	0.298661	rs9623320	L3MBTL2:RP4-756G23.5	00:00:00	ncRNA_intronic	3.484	NA
PD-OSA	rs35025246	22	41615125	C	T	0.01392	NA	0.298661	rs9623320	L3MBTL2	0	intronic	0.775	6
PD-OSA	rs191954184	22	41777295	C	T	0.01392	NA	0.212469	rs9623320	TEF	0	intronic	5.228	2b
PD-OSA	rs13057284	22	41818084	G	A	0.0159	NA	0.255264	rs9623320	CTA-223H9.9	8853	intergenic	0.977	6
PD-OSA	rs13054317	22	42005038	C	T	0.01392	NA	0.212469	rs9623320	DESI1	0	intronic	0.415	6
PD-asthma	rs117149936	9	5904604	C	T	0.02584	1.63017e-06	1	rs117149936	KIAA2026:MLANA	00:00:00	intronic	4.069	7
PD-asthma	rs183470020	9	5935865	G	A	0.001988	0.00562938	0.665336	rs370820588	KIAA2026	0	intronic	1.069	7
PD-asthma	rs139499742	9	6177719	C	A	0.002982	NA	1	rs370820588	RP11-575C20.1	18214	intergenic	0.251	7
PD-asthma	rs149045797	9	6252690	T	G	0.002982	5.41302e-06	1	rs370820588	IL33	0	intronic	4.844	6
PD-asthma	rs146597587	9	6255967	G	C	0.002982	7.41081e-06	1	rs370820588	IL33	0	splicing	32	5
PD-asthma	rs370820588	9	6263444	G	C	0.002982	1.30954e-06	1	rs370820588	IL33	5460	intergenic	6.218	6
PD-asthma	rs143215670	9	6264551	G	C	0.002982	1.02163e-05	1	rs370820588	IL33	6567	intergenic	3.37	6
PD-asthma	rs201998351	9	6268581	T	C	0.002982	8.30727e-06	1	rs370820588	RP11-279E1.1	8058	intergenic	0.45	6
PD-asthma	rs145697747	9	6288604	G	C	0.002982	NA	1	rs370820588	RP11-307L3.2	9450	intergenic	2.879	7
PD-asthma	rs185705622	9	6291948	G	C	0.002982	6.89784e-06	1	rs370820588	RP11-307L3.2	12794	intergenic	8.369	6
PD-asthma	rs186174039	9	6292798	G	C	0.002982	5.49117e-06	1	rs370820588	RP11-307L3.2	13644	intergenic	1.028	7
PD-asthma	rs564745363	9	6298298	G	C	0.002982	NA	1	rs370820588	RP11-307L3.2	19144	intergenic	0.336	NA
PD-asthma	rs139231440	9	6313945	ATT	A	0.06064	NA	0.889438	rs79822462	TPD52L3	14403	intergenic	3.229	NA
PD-asthma	rs79822462	9	6332216	G	A	0.05666	6.84714e-07	1	rs79822462	TPD52L3	315	downstream	0.22	7
PD-asthma	rs150883069	9	6377725	C	T	0.001988	NA	0.665336	rs370820588	UHRF2	35425	intergenic	1.253	7
PD-asthma	rs117715439	9	6387093	A	C	0.05964	7.6531e-06	0.906391	rs79822462	UHRF2	26057	intergenic	0.709	6
PD-asthma	rs72691740	9	6411087	G	A	0.0666	NA	0.803984	rs79822462	UHRF2	2063	intergenic	0.728	4
PD-asthma	rs147354178	9	6445667	C	T	0.05467	9.55106e-06	0.921613	rs79822462	UHRF2:RP11-307L3.4	00:00:00	ncRNA_intronic	4.533	7
PD-asthma	rs928393	9	6542674	T	C	0.3608	NA	0.798295	rs4419859	GLDC	0	intronic	1.574	NA
PD-asthma	rs4518719	9	6544085	C	T	0.326	NA	0.731022	rs4419859	GLDC	0	intronic	0.416	5
PD-asthma	rs557990557	9	6544638	C	CAAAA	0.3708	NA	0.652035	rs4419859	GLDC	0	intronic	1.124	NA
PD-asthma	rs4419859	9	6544766	T	C	0.4006	3.15993e-06	1	rs4419859	GLDC	0	intronic	6.671	6
PD-asthma	rs34257478	9	6545108	G	GA	0.4125	NA	0.917653	rs4419859	GLDC	0	intronic	0.584	NA
PD-asthma	rs4742214	9	6548053	C	G	0.3757	NA	0.784363	rs4419859	GLDC	0	intronic	1.457	7
PD-asthma	rs7863638	9	6548270	A	G	0.3579	NA	0.820307	rs4419859	GLDC	0	intronic	4.114	7
PD-asthma	rs1570106	14	68346398	T	C	0.00497	3.02783e-09	1	rs1570106	RAD51B	0	intronic	0.364	6
PD-asthma	rs184882840	14	68741645	C	A	0.00497	NA	1	rs1570106	RAD51B	0	intronic	4.969	4
PD-asthma	rs186097252	16	30156864	C	T	0.000994	NA	1	rs13708	MAPK3	22036	intergenic	4.222	7
PD-asthma	rs193130862	16	30340829	T	C	0.000994	NA	1	rs13708	RP11-347C12.2	0	ncRNA_intronic	6.569	7
PD-asthma	rs543408075	16	30363456	G	A	0.000994	NA	1	rs13708	CD2BP2	0	UTR3	10.56	NA
PD-asthma	rs185756086	16	30395098	C	T	0.000994	NA	1	rs13708	ZNF48:SEPT1	00:00:00	intronic	4.931	4
PD-asthma	rs137953624	16	30557326	G	A	0.000994	NA	1	rs13708	AC002310.13	0	intronic	3.557	5
PD-asthma	rs187238586	16	30584316	C	A	0.000994	NA	1	rs13708	AC002310.7	0	ncRNA_intronic	2.585	5
PD-asthma	rs191636755	16	30587877	T	C	0.000994	NA	1	rs13708	AC002310.7:ZNF785	00:00:00	ncRNA_intronic	3.43	5
PD-asthma	rs138465880	16	30813729	C	A	0.000994	NA	1	rs13708	ZNF629	15205	intergenic	1.249	5
PD-asthma	rs13708	16	30989488	G	A	0.000994	2.89292e-16	1	rs13708	SETD1A	0	intronic	0.089	NA
PD-asthma	rs192092689	16	31119916	C	G	0.000994	NA	1	rs13708	BCKDK	0	UTR5	13.18	4
PD-asthma	rs578045976	16	31358035	C	T	0.000994	NA	1	rs13708	ITGAX	8419	intergenic	0.842	NA
PD-asthma	rs191977269	16	31558740	T	C	0.000994	NA	1	rs13708	VN1R64P	0	ncRNA_exonic	9.669	5
PD-asthma	rs183355253	16	31776323	C	G	0.000994	NA	1	rs13708	ZNF720	0	intronic	0.562	7
PD-asthma	rs550082943	16	31824050	T	C	0.000994	NA	1	rs13708	VN1R3	3884	intergenic	1.321	NA
PD-asthma	rs181060870	16	31988266	C	A	0.000994	NA	1	rs13708	RP11-1166P10.1	0	ncRNA_intronic	0.133	5
PD-asthma	rs143667502	17	15254741	G	A	0.000994	NA	1	rs21180	TEKT3	9782	intergenic	1.348	3a
PD-asthma	rs575617154	17	15947376	G	A	0.000994	NA	1	rs21180	TTC19:NCOR1	00:00:00	intronic	0.075	NA
PD-asthma	rs537679516	17	15963608	C	T	0.000994	NA	1	rs21180	NCOR1	0	intronic	3.258	NA
PD-asthma	rs21180	17	16184694	C	T	0.000994	3.74472e-13	1	rs21180	PIGL	0	intronic	4.168	NA
PD-asthma	rs572839613	17	16344444	G	A	0.000994	NA	1	rs21180	FAM211A-AS1	0	ncRNA_exonic	11.45	NA
PD-asthma	rs567561959	17	16718325	C	G	0.000994	NA	1	rs21180	RP11-219A15.4	0	ncRNA_intronic	1.11	NA
PD-asthma	rs568349423	17	16757938	C	T	0.000994	NA	1	rs21180	COTL1P1	314	downstream	2.87	NA
PD-asthma	rs544960503	17	16787404	G	A	0.000994	NA	1	rs21180	RP1-48J14.1	9107	intergenic	3.07	NA
PD-asthma	rs528620052	17	16809809	A	G	0.000994	NA	1	rs21180	RP1-48J14.1	13065	intergenic	1.35	NA
PD-asthma	rs138611565	17	16860006	T	C	0.000994	NA	1	rs21180	TNFRSF13B	0	intronic	3.913	5
PD-asthma	rs527688264	17	16885825	C	T	0.000994	NA	1	rs21180	AC104024.1	1157	intergenic	7.527	NA
PD-asthma	rs149698604	17	17016149	C	G	0.000994	NA	1	rs21180	MPRIP	0	intronic	3.908	5
PD-asthma	rs6002333	22	41719469	C	T	0.2584	NA	0.784679	rs139571	ZC3H7B	0	intronic	1.999	5
PD-asthma	rs5758297	22	41720697	A	G	0.2674	NA	0.752792	rs139571	ZC3H7B	0	intronic	4.645	5
PD-asthma	rs5751077	22	41720728	G	C	0.2674	NA	0.752792	rs139571	ZC3H7B	0	intronic	2.295	5
PD-asthma	rs3927	22	41722864	T	C	0.2584	NA	0.784679	rs139571	ZC3H7B	0	intronic	3.41	1f
PD-asthma	rs5758300	22	41725180	C	G	0.2694	NA	0.745569	rs139571	ZC3H7B	0	intronic	2.283	6
PD-asthma	rs4822021	22	41726053	G	A	0.2624	NA	0.772774	rs139571	ZC3H7B	0	exonic	10.4	5
PD-asthma	rs6002337	22	41726803	T	G	0.2624	NA	0.772774	rs139571	ZC3H7B	0	intronic	0.057	6
PD-asthma	rs9611556	22	41727031	G	A	0.2584	NA	0.784679	rs139571	ZC3H7B	0	intronic	1.178	7
PD-asthma	rs9611557	22	41727260	T	A	0.2634	NA	0.770837	rs139571	ZC3H7B	0	intronic	1.577	6
PD-asthma	rs111779762	22	41727419	G	GC	0.2654	NA	0.758127	rs139571	ZC3H7B	0	intronic	0.822	NA
PD-asthma	rs2143695	22	41728620	T	C	0.2664	NA	0.763466	rs139571	ZC3H7B	0	intronic	0.412	1f
PD-asthma	rs8137373	22	41729216	G	A	0.2634	NA	0.7782	rs139571	ZC3H7B	0	intronic	2.416	1f
PD-asthma	rs2235845	22	41729294	T	G	0.2664	NA	0.763466	rs139571	ZC3H7B	0	intronic	1.623	6
PD-asthma	rs3215566	22	41730540	A	AG	0.2813	NA	0.7041	rs139571	ZC3H7B	0	intronic	2.733	NA
PD-asthma	rs5758301	22	41732389	T	C	0.2674	NA	0.759791	rs139571	ZC3H7B	0	intronic	0.463	6
PD-asthma	rs4822022	22	41733895	A	G	0.2644	NA	0.776245	rs139571	ZC3H7B	0	intronic	0.799	5
PD-asthma	rs5751080	22	41736267	A	G	0.2664	NA	0.763466	rs139571	ZC3H7B	0	intronic	5.208	5
PD-asthma	rs2235846	22	41741042	G	C	0.2664	NA	0.763466	rs139571	ZC3H7B	0	intronic	3.17	6
PD-asthma	rs4822023	22	41741544	G	A	0.2584	NA	0.794087	rs139571	ZC3H7B	0	intronic	0.206	7
PD-asthma	rs5751081	22	41742788	A	T	0.2654	NA	0.767164	rs139571	ZC3H7B	0	intronic	0.262	7
PD-asthma	rs761366	22	41744022	C	G	0.2525	NA	0.816682	rs139571	ZC3H7B	0	intronic	3.827	2b
PD-asthma	rs4239894	22	41745548	C	G	0.2475	NA	0.834676	rs139571	ZC3H7B	0	intronic	1.123	4
PD-asthma	rs2281332	22	41746212	T	C	0.2664	NA	0.763466	rs139571	ZC3H7B	0	intronic	1.684	4
PD-asthma	rs3817999	22	41747717	G	A	0.2495	NA	0.82112	rs139571	ZC3H7B	0	intronic	0.762	1f
PD-asthma	rs71803158	22	41747814	CATTTT	C	0.2565	NA	0.796081	rs139571	ZC3H7B	0	intronic	4.337	NA
PD-asthma	rs2281333	22	41749630	T	C	0.2475	NA	0.827939	rs139571	ZC3H7B	0	intronic	2.599	5
PD-asthma	rs7290404	22	41749796	C	T	0.2406	NA	0.86161	rs139571	ZC3H7B	0	intronic	6.417	5
PD-asthma	rs5758307	22	41750219	A	G	0.2475	NA	0.827939	rs139571	ZC3H7B	0	intronic	1.221	5
PD-asthma	rs12484074	22	41752747	G	A	0.2396	NA	0.854822	rs139571	ZC3H7B	0	exonic	8.68	5
PD-asthma	rs1109151	22	41752944	A	G	0.2555	NA	0.803587	rs139571	ZC3H7B	0	intronic	0.061	NA
PD-asthma	rs28638318	22	41753059	G	A	0.2356	NA	0.83835	rs139571	ZC3H7B	0	intronic	8.168	5
PD-asthma	rs5751084	22	41755105	A	G	0.2137	NA	0.667395	rs139571	ZC3H7B	0	UTR3	15.36	4
PD-asthma	rs9538	22	41755857	G	T	0.2386	NA	0.860633	rs139571	ZC3H7B	0	UTR3	6.644	1f
PD-asthma	rs56021266	22	41756571	C	T	0.169	NA	0.616237	rs139571	ZC3H7B	419	downstream	7.961	4
PD-asthma	rs6002351	22	41757223	C	T	0.2465	NA	0.832188	rs139571	ZC3H7B	1071	intergenic	1.964	7
PD-asthma	rs9611561	22	41757234	C	G	0.2396	NA	0.866184	rs139571	ZC3H7B	1082	intergenic	0.307	7
PD-asthma	rs4822024	22	41757647	G	A	0.2435	NA	0.850715	rs139571	ZC3H7B	1495	intergenic	0.3	5
PD-asthma	rs10678780	22	41759125	C	CCT	0.2475	NA	0.827939	rs139571	ZC3H7B	2973	intergenic	1.406	NA
PD-asthma	rs5758311	22	41759375	G	T	0.2485	NA	0.823717	rs139571	ZC3H7B	3223	intergenic	0.708	6
PD-asthma	rs9607798	22	41759987	A	G	0.2445	NA	0.846301	rs139571	TEF	3349	intergenic	3.583	5
PD-asthma	rs9611562	22	41760172	T	G	0.2425	NA	0.84251	rs139571	TEF	3164	intergenic	2.765	7
PD-asthma	rs4820437	22	41761290	T	C	0.2465	NA	0.820953	rs139571	TEF	2046	intergenic	4.836	2a
PD-asthma	rs5758314	22	41762523	T	G	0.2594	NA	0.78432	rs139571	TEF	813	upstream	1.507	5
PD-asthma	rs4820438	22	41767135	C	T	0.2445	NA	0.856264	rs139571	TEF	0	intronic	1.633	6
PD-asthma	rs9611565	22	41767486	T	C	0.2584	NA	0.803551	rs139571	TEF	0	intronic	3.684	1f
PD-asthma	rs9611566	22	41768625	C	T	0.2425	NA	0.8639	rs139571	TEF	0	intronic	0.402	1f
PD-asthma	rs5751086	22	41768862	C	T	0.2664	NA	0.739538	rs139571	TEF	0	intronic	1.051	6
PD-asthma	rs9611567	22	41769754	A	G	0.2455	NA	0.854612	rs139571	TEF	0	intronic	3.821	6
PD-asthma	rs6002358	22	41769770	A	C	0.2475	NA	0.84741	rs139571	TEF	0	intronic	1.246	6
PD-asthma	rs201962734	22	41774153	AAGCTTCCTT	A	0.2316	NA	0.913376	rs139571	TEF	0	intronic	3.573	NA
PD-asthma	rs9611569	22	41774381	G	A	0.2296	NA	0.901285	rs139571	TEF	0	intronic	0.002	7
PD-asthma	rs73176682	22	41775880	A	G	0.2326	NA	0.909473	rs139571	TEF	0	intronic	1.368	7
PD-asthma	rs4822025	22	41776646	G	C	0.2336	NA	0.904646	rs139571	TEF	0	intronic	2.088	1f
PD-asthma	rs2234052	22	41777241	A	G	0.2326	NA	0.909473	rs139571	TEF	0	intronic	8.5	4
PD-asthma	rs2234053	22	41777315	G	T	0.2326	NA	0.909473	rs139571	TEF	0	intronic	4.665	2b
PD-asthma	rs9607799	22	41777558	A	G	0.2326	NA	0.909473	rs139571	TEF	0	intronic	9.178	1d
PD-asthma	rs2234058	22	41777883	G	A	0.2326	NA	0.909473	rs139571	TEF	0	intronic	4.549	2b
PD-asthma	rs2234059	22	41777913	T	C	0.2326	NA	0.909473	rs139571	TEF	0	intronic	15.85	4
PD-asthma	rs3788584	22	41779073	T	A	0.2326	NA	0.909473	rs139571	TEF	0	intronic	6.9	5
PD-asthma	rs767593	22	41779971	G	T	0.2316	NA	0.913376	rs139571	TEF	0	intronic	0.496	5
PD-asthma	rs73176685	22	41781094	C	G	0.2425	NA	0.865174	rs139571	TEF	0	intronic	1.468	7
PD-asthma	rs73176686	22	41782119	C	T	0.2256	NA	0.941937	rs139571	TEF	0	intronic	1.775	6
PD-asthma	rs73176687	22	41782423	C	A	0.2256	NA	0.941937	rs139571	TEF	0	intronic	9.586	7
PD-asthma	rs111763257	22	41782435	G	A	0.2256	NA	0.941937	rs139571	TEF	0	intronic	6.642	7
PD-asthma	rs73176689	22	41782633	T	C	0.2256	NA	0.941937	rs139571	TEF	0	intronic	0.324	6
PD-asthma	rs9611570	22	41782721	G	T	0.2256	NA	0.941937	rs139571	TEF	0	intronic	1.116	7
PD-asthma	rs11546403	22	41783659	C	T	0.2376	NA	0.885668	rs139571	TEF	0	exonic	9.348	1f
PD-asthma	rs9607800	22	41784562	A	G	0.2366	NA	0.890364	rs139571	TEF	0	intronic	3.79	7
PD-asthma	rs9611571	22	41784867	G	A	0.2366	NA	0.890364	rs139571	TEF	0	intronic	0.252	6
PD-asthma	rs9611572	22	41785287	G	A	0.2366	NA	0.890364	rs139571	TEF	0	intronic	0.264	7
PD-asthma	rs200040074	22	41785516	T	TG	0.2366	NA	0.890364	rs139571	TEF	0	intronic	1.227	NA
PD-asthma	rs73176692	22	41785735	G	A	0.2366	NA	0.890364	rs139571	TEF	0	intronic	7.225	7
PD-asthma	rs28604950	22	41785812	A	G	0.2356	NA	0.89404	rs139571	TEF	0	intronic	3.16	7
PD-asthma	rs4822027	22	41786227	G	A	0.2256	NA	0.941937	rs139571	TEF	0	intronic	2.334	6
PD-asthma	rs73176694	22	41786788	C	T	0.2366	NA	0.890364	rs139571	TEF	0	intronic	7.95	6
PD-asthma	rs566421536	22	41787335	C	CTT	0.2276	NA	0.855992	rs139571	TEF	0	intronic	1.066	NA
PD-asthma	rs9611573	22	41787676	G	C	0.2366	NA	0.890364	rs139571	TEF	0	intronic	1.973	6
PD-asthma	rs5758324	22	41787950	G	T	0.2396	NA	0.869953	rs139571	TEF	0	intronic	0.233	7
PD-asthma	rs4822028	22	41789408	A	G	0.2366	NA	0.890364	rs139571	TEF	0	intronic	6.194	5
PD-asthma	rs60119330	22	41791045	T	C	0.2376	NA	0.886803	rs139571	TEF	0	intronic	3.044	7
PD-asthma	rs74484224	22	41791200	G	A	0.2356	NA	0.89404	rs139571	TEF	0	intronic	1.936	6
PD-asthma	rs9611577	22	41793090	T	G	0.2356	NA	0.89404	rs139571	TEF	0	UTR3	4.238	1f
PD-asthma	rs132901	22	41797547	T	C	0.2237	NA	0.940861	rs139571	TEF	2216	intergenic	11.31	6
PD-asthma	rs132902	22	41797758	A	G	0.2237	NA	0.940861	rs139571	TEF	2427	intergenic	0.493	1f
PD-asthma	rs202645	22	41798520	G	A	0.2147	NA	0.988544	rs139571	TEF	3189	intergenic	1.608	4
PD-asthma	rs132904	22	41798896	C	G	0.2256	NA	0.929161	rs139571	TEF	3565	intergenic	1.794	5
PD-asthma	rs132905	22	41799106	A	C	0.2256	NA	0.929161	rs139571	TEF	3775	intergenic	1.871	6
PD-asthma	rs132906	22	41799767	C	G	0.2416	NA	0.867199	rs139571	TEF	4436	intergenic	1.815	4
PD-asthma	rs75784	22	41799833	T	G	0.2256	NA	0.929161	rs139571	TEF	4502	intergenic	1.649	4
PD-asthma	rs169364	22	41800678	T	C	0.2256	NA	0.929161	rs139571	TEF	5347	intergenic	2.426	7
PD-asthma	rs132907	22	41801268	C	A	0.2256	NA	0.929161	rs139571	TEF	5937	intergenic	0.112	6
PD-asthma	rs6002372	22	41801299	T	A	0.2256	NA	0.929161	rs139571	TEF	5968	intergenic	1.219	6
PD-asthma	rs5758335	22	41801461	T	G	0.2256	NA	0.929161	rs139571	TEF	6130	intergenic	1.352	6
PD-asthma	rs132908	22	41801795	A	G	0.2256	NA	0.929161	rs139571	TEF	6464	intergenic	12.7	3a
PD-asthma	rs132909	22	41802031	A	G	0.2256	NA	0.929161	rs139571	TEF	6700	intergenic	0.026	4
PD-asthma	rs561031700	22	41802074	CT	C	0.2773	NA	0.706298	rs139571	TEF	6743	intergenic	3.248	NA
PD-asthma	rs5751094	22	41803279	T	C	0.2256	NA	0.929161	rs139571	TEF	7948	intergenic	1.038	6
PD-asthma	rs132910	22	41803635	CTG	C	0.2256	NA	0.929161	rs139571	TEF	8304	intergenic	4.572	NA
PD-asthma	rs132911	22	41804160	T	C	0.2256	NA	0.929161	rs139571	TEF	8829	intergenic	0.544	6
PD-asthma	rs132912	22	41804214	G	A	0.2256	NA	0.929161	rs139571	TEF	8883	intergenic	0.454	7
PD-asthma	rs142168704	22	41805389	G	GAA	0.3012	NA	0.605275	rs139571	TEF	10058	intergenic	1.196	NA
PD-asthma	rs200742875	22	41805688	A	AAAAAAAAAAAG	0.2256	NA	0.929161	rs139571	TEF	10357	intergenic	0.563	NA
PD-asthma	rs132914	22	41805749	C	T	0.2256	NA	0.929161	rs139571	TEF	10418	intergenic	4.932	7
PD-asthma	rs132915	22	41805782	C	T	0.2256	NA	0.929161	rs139571	TEF	10451	intergenic	7.461	5
PD-asthma	rs111611911	22	41806642	T	TGTGTGTGC	0.2256	NA	0.929161	rs139571	TEF	11311	intergenic	5.708	NA
PD-asthma	rs132916	22	41806768	G	C	0.2356	NA	0.881606	rs139571	TEF	11437	intergenic	1.075	5
PD-asthma	rs132917	22	41806928	C	T	0.2256	NA	0.929161	rs139571	TEF	11597	intergenic	3.253	6
PD-asthma	rs132918	22	41808350	T	C	0.2256	NA	0.929161	rs139571	TEF	13019	intergenic	0.889	7
PD-asthma	rs202634	22	41809623	G	A	0.2237	NA	0.91789	rs139571	TEF	14292	intergenic	8.382	4
PD-asthma	rs202635	22	41809637	T	C	0.2256	NA	0.929161	rs139571	TEF	14306	intergenic	7.424	4
PD-asthma	rs132919	22	41809903	C	G	0.2545	NA	0.79225	rs139571	TEF	14572	intergenic	14.52	4
PD-asthma	rs132920	22	41810170	C	T	0.2266	NA	0.923958	rs139571	TEF	14839	intergenic	5.533	4
PD-asthma	rs202659	22	41811620	C	T	0.2266	NA	0.934848	rs139571	CTA-223H9.9	15317	intergenic	5.098	4
PD-asthma	rs132921	22	41812044	A	G	0.2266	NA	0.934848	rs139571	CTA-223H9.9	14893	intergenic	0.438	7
PD-asthma	rs132922	22	41812084	A	G	0.2266	NA	0.934848	rs139571	CTA-223H9.9	14853	intergenic	0.295	6
PD-asthma	rs202661	22	41812439	G	A	0.2266	NA	0.934848	rs139571	CTA-223H9.9	14498	intergenic	4.128	7
PD-asthma	rs202662	22	41812755	T	C	0.2266	NA	0.934848	rs139571	CTA-223H9.9	14182	intergenic	9.015	7
PD-asthma	rs202663	22	41812819	C	T	0.2266	NA	0.934848	rs139571	CTA-223H9.9	14118	intergenic	3.025	7
PD-asthma	rs202664	22	41813886	T	C	0.2157	NA	0.994255	rs139571	CTA-223H9.9	13051	intergenic	4.687	1f
PD-asthma	rs202665	22	41814401	G	A	0.2157	NA	0.994255	rs139571	CTA-223H9.9	12536	intergenic	8.112	2b
PD-asthma	rs202666	22	41814719	C	T	0.2157	NA	0.994255	rs139571	CTA-223H9.9	12218	intergenic	0.014	6
PD-asthma	rs202667	22	41815530	A	G	0.2187	NA	0.988668	rs139571	CTA-223H9.9	11407	intergenic	0.852	6
PD-asthma	rs56127793	22	41816225	C	CA	0.2177	NA	0.994259	rs139571	CTA-223H9.9	10712	intergenic	1.201	NA
PD-asthma	rs5758343	22	41816652	T	A	0.2167	NA	1	rs139571	CTA-223H9.9	10285	intergenic	0.868	6
PD-asthma	rs60710547	22	41817306	CA	C	0.2167	NA	1	rs139571	CTA-223H9.9	9631	intergenic	0.51	NA
PD-asthma	rs5758344	22	41817685	A	G	0.2167	NA	1	rs139571	CTA-223H9.9	9252	intergenic	7.242	5
PD-asthma	rs5758345	22	41817878	G	A	0.2167	NA	1	rs139571	CTA-223H9.9	9059	intergenic	10.58	7
PD-asthma	rs139571	22	41818234	G	A	0.2167	2.8652e-06	1	rs139571	CTA-223H9.9	8703	intergenic	2.494	7
PD-asthma	rs2413644	22	41818276	G	A	0.2167	NA	1	rs139571	CTA-223H9.9	8661	intergenic	2.369	6
PD-asthma	rs420071	22	41819667	C	T	0.2217	NA	0.972541	rs139571	CTA-223H9.9	7270	intergenic	4.588	6
PD-asthma	rs12165508	22	41819960	C	T	0.2326	NA	0.91725	rs139571	CTA-223H9.9	6977	intergenic	1.953	7
PD-asthma	rs2142505	22	41820541	G	A	0.2167	NA	1	rs139571	CTA-223H9.9	6396	intergenic	2.775	7
PD-asthma	rs5758347	22	41821019	T	G	0.2167	NA	1	rs139571	CTA-223H9.9	5918	intergenic	4.218	6
PD-asthma	rs6002378	22	41821216	C	T	0.2167	NA	1	rs139571	CTA-223H9.9	5721	intergenic	0.335	6
PD-asthma	rs6002379	22	41821253	A	G	0.2217	NA	0.972541	rs139571	CTA-223H9.9	5684	intergenic	1.316	7
PD-asthma	rs6002380	22	41821423	T	C	0.2167	NA	1	rs139571	CTA-223H9.9	5514	intergenic	0.143	7
PD-asthma	rs6002381	22	41821460	C	T	0.2167	NA	1	rs139571	CTA-223H9.9	5477	intergenic	2.426	6
PD-asthma	rs11370239	22	41821963	TA	T	0.2167	NA	1	rs139571	CTA-223H9.9	4974	intergenic	2.623	NA
PD-asthma	rs202613	22	41821993	A	C	0.2167	NA	1	rs139571	CTA-223H9.9	4944	intergenic	2.868	4
PD-asthma	rs202614	22	41822150	C	A	0.2167	NA	1	rs139571	CTA-223H9.9	4787	intergenic	2.483	5
PD-asthma	rs202616	22	41822221	G	C	0.2167	NA	1	rs139571	CTA-223H9.9	4716	intergenic	1.204	5
PD-asthma	rs188057	22	41822305	G	T	0.2167	NA	1	rs139571	CTA-223H9.9	4632	intergenic	0.256	7
PD-asthma	rs202617	22	41822793	A	G	0.2167	NA	1	rs139571	CTA-223H9.9	4144	intergenic	0.331	6
PD-asthma	rs202618	22	41822856	G	A	0.2157	NA	0.994259	rs139571	CTA-223H9.9	4081	intergenic	5.136	7
PD-asthma	rs202619	22	41823626	C	T	0.2167	NA	1	rs139571	CTA-223H9.9	3311	intergenic	3.123	7
PD-asthma	rs113051466	22	41824197	AAAT	A	0.2187	NA	0.988562	rs139571	CTA-223H9.9	2740	intergenic	0.672	NA
PD-asthma	rs202620	22	41824836	C	T	0.2167	NA	1	rs139571	CTA-223H9.9	2101	intergenic	1.11	7
PD-asthma	rs202622	22	41825342	G	T	0.2167	NA	1	rs139571	CTA-223H9.9	1595	intergenic	2.274	5
PD-asthma	rs202623	22	41826440	C	T	0.2167	NA	1	rs139571	CTA-223H9.9	497	upstream	4.068	7
PD-asthma	rs202624	22	41826802	A	G	0.2167	NA	1	rs139571	CTA-223H9.9	135	upstream	0.816	7
PD-asthma	rs202625	22	41827082	A	G	0.2167	NA	1	rs139571	CTA-223H9.9	0	ncRNA_exonic	0.153	7
PD-asthma	rs169362	22	41827589	C	G	0.2326	NA	0.91725	rs139571	CTA-223H9.9	209	downstream	0.501	5
PD-asthma	rs5751101	22	41828111	T	C	0.2177	NA	0.994259	rs139571	CTA-223H9.9	731	downstream	2.667	2b
PD-asthma	rs7285041	22	41829149	T	G	0.2167	NA	1	rs139571	TOB2	346	downstream	2.92	5
PD-asthma	rs6609	22	41829794	G	C	0.2167	NA	1	rs139571	TOB2	0	UTR3	5.933	5
PD-asthma	rs9611591	22	41830212	A	G	0.2326	NA	0.91725	rs139571	TOB2	0	UTR3	12.34	5
PD-asthma	rs202641	22	41833116	T	C	0.2227	NA	0.967532	rs139571	TOB2	0	exonic	2.354	NA
PD-asthma	rs202642	22	41833527	T	C	0.2217	NA	0.972541	rs139571	TOB2	0	intronic	1.658	NA
PD-asthma	rs2011790	22	41835452	A	G	0.2167	NA	1	rs139571	TOB2	0	intronic	8.857	7
PD-asthma	rs79005	22	41835544	A	G	0.2217	NA	0.972541	rs139571	TOB2	0	intronic	2.399	7
PD-asthma	rs71184805	22	41836262	CAGGCG	C	0.2217	NA	0.972541	rs139571	TOB2	0	intronic	0.848	NA
PD-asthma	rs71184806	22	41836873	AT	A	0.2237	NA	0.960715	rs139571	TOB2	0	intronic	3.219	NA
PD-asthma	rs202650	22	41837541	C	G	0.2217	NA	0.972541	rs139571	TOB2	0	intronic	0.075	7
PD-asthma	rs202652	22	41838792	G	A	0.2217	NA	0.972541	rs139571	TOB2	0	intronic	1.703	6
PD-asthma	rs71184808	22	41839625	A	ATT	0.1839	NA	0.74992	rs139571	TOB2	0	intronic	4.217	NA
PD-asthma	rs169365	22	41839714	A	G	0.2177	NA	0.994259	rs139571	TOB2	0	intronic	2.147	7
PD-asthma	rs202653	22	41840158	T	C	0.2217	NA	0.972541	rs139571	TOB2	0	intronic	6.083	4
PD-asthma	rs106860	22	41840407	C	T	0.2167	NA	1	rs139571	TOB2	0	intronic	9.184	NA
PD-asthma	rs202654	22	41841034	A	G	0.2326	NA	0.91725	rs139571	TOB2	0	intronic	13.97	4
PD-asthma	rs202655	22	41841564	C	G	0.2217	NA	0.972541	rs139571	TOB2	0	intronic	7.276	3a
PD-asthma	rs202656	22	41842203	A	T	0.2167	NA	1	rs139571	TOB2	0	intronic	7.015	4
PD-asthma	rs202657	22	41844786	T	G	0.2197	NA	0.983253	rs139571	TOB2	1758	intergenic	5.697	1f
PD-asthma	rs202658	22	41846074	C	G	0.2167	NA	1	rs139571	TOB2	3046	intergenic	0.88	7
PD-asthma	rs202626	22	41847190	A	C	0.2217	NA	0.972541	rs139571	TOB2	4162	intergenic	0.439	6
PD-asthma	rs202627	22	41847367	T	A	0.2217	NA	0.972541	rs139571	TOB2	4339	intergenic	0.167	6
PD-asthma	rs202628	22	41849513	A	G	0.2217	NA	0.972541	rs139571	PHF5A	6207	intergenic	1.761	1f
PD-asthma	rs202629	22	41849975	T	C	0.2227	NA	0.967114	rs139571	PHF5A	5745	intergenic	7.878	6
PD-asthma	rs202630	22	41850230	T	C	0.2207	NA	0.977712	rs139571	PHF5A	5490	intergenic	1.779	5
PD-asthma	rs79008	22	41850500	G	A	0.2207	NA	0.977712	rs139571	PHF5A	5220	intergenic	0.773	1f
PD-asthma	rs202636	22	41852479	C	T	0.2207	NA	0.977712	rs139571	PHF5A	3241	intergenic	3.624	6
PD-asthma	rs169363	22	41853117	T	G	0.2207	NA	0.977712	rs139571	PHF5A	2603	intergenic	0.956	7
PD-asthma	rs202637	22	41853928	G	A	0.2008	NA	0.910797	rs139571	PHF5A	1792	intergenic	2.954	5
PD-asthma	rs9607805	22	41854446	T	C	0.2962	NA	0.639046	rs139571	PHF5A	1274	intergenic	3.042	5
PD-asthma	rs202638	22	41855458	G	A	0.2276	NA	0.941141	rs139571	PHF5A	262	downstream	0.072	6
PD-asthma	rs5758364	22	41855912	C	A	0.2465	NA	0.856131	rs139571	PHF5A	0	UTR3	1.233	6
PD-asthma	rs9423	22	41855923	C	A	0.2465	NA	0.856131	rs139571	PHF5A	0	UTR3	0.074	6
PD-asthma	rs202639	22	41856137	A	T	0.2207	NA	0.977712	rs139571	PHF5A	0	UTR3	1.867	5
PD-asthma	rs11445364	22	41857397	CT	C	0.2853	NA	0.707534	rs139571	PHF5A	0	intronic	1.467	NA
PD-asthma	rs5751107	22	41857812	G	A	0.2157	NA	0.994255	rs139571	PHF5A	0	intronic	4.352	7
PD-asthma	rs5751108	22	41858035	C	T	0.2167	NA	1	rs139571	PHF5A	0	intronic	1.067	5
PD-asthma	rs5758365	22	41858657	G	A	0.2207	NA	0.977712	rs139571	PHF5A	0	intronic	1.193	7
PD-asthma	rs6002385	22	41859556	C	T	0.2167	NA	1	rs139571	PHF5A	0	intronic	1.077	7
PD-asthma	rs11344396	22	41859621	C	CA	0.2227	NA	0.967532	rs139571	PHF5A	0	intronic	0.398	NA
PD-asthma	rs6002386	22	41859661	G	A	0.2207	NA	0.977712	rs139571	PHF5A	0	intronic	0.445	7
PD-asthma	rs79009	22	41860864	A	C	0.2207	NA	0.977712	rs139571	PHF5A	0	intronic	2.715	5
PD-asthma	rs5758368	22	41862288	C	T	0.2217	NA	0.972541	rs139571	PHF5A	0	intronic	1.365	1f
PD-asthma	rs11304465	22	41863040	C	CT	0.2237	NA	0.950218	rs139571	PHF5A	0	intronic	0.738	NA
PD-asthma	rs202631	22	41863423	G	A	0.2217	NA	0.972541	rs139571	PHF5A	0	intronic	8.041	NA
PD-asthma	rs505533	22	41864216	C	A	0.2326	NA	0.91725	rs139571	PHF5A	0	intronic	7.585	4
PD-asthma	rs19573	22	41865809	A	C	0.2217	NA	0.972541	rs139571	ACO2	0	intronic	3.699	NA
PD-asthma	rs3045389	22	41865843	T	TGATA	0.2217	NA	0.972541	rs139571	ACO2	0	intronic	7.821	NA
PD-asthma	rs79011	22	41866938	G	A	0.2217	NA	0.972541	rs139571	ACO2	0	intronic	0.17	NA
PD-asthma	rs3045391	22	41867105	TTGTC	T	0.2217	NA	0.972541	rs139571	ACO2	0	intronic	4.417	NA
PD-asthma	rs727563	22	41867377	T	C	0.2326	NA	0.91725	rs139571	ACO2	0	intronic	3.112	NA
PD-asthma	rs169361	22	41877989	G	A	0.2137	NA	0.959937	rs139571	ACO2	0	intronic	1.699	NA
PD-asthma	rs5845503	22	41891630	CT	C	0.2644	NA	0.723562	rs139571	ACO2	0	intronic	0.615	NA
PD-asthma	rs548469778	22	41900713	G	A	0.000994	NA	0.90755	rs139571	ACO2	0	intronic	2.435	NA
PD-asthma	rs35948127	22	41900713	G	GA	0.2326	NA	0.90755	rs139571	ACO2	0	NA	1.394	NA
PD-asthma	rs137830	22	41902503	T	C	0.2167	NA	0.932452	rs139571	ACO2	0	intronic	0.535	7
PD-asthma	rs2076199	22	41903743	G	T	0.2326	NA	0.90755	rs139571	ACO2	0	intronic	1.941	5
PD-asthma	rs2413646	22	41906325	C	T	0.2127	NA	0.954325	rs139571	ACO2	0	intronic	0.369	5
PD-asthma	rs2413647	22	41907148	G	A	0.2147	NA	0.943201	rs139571	ACO2	0	intronic	1.156	6
PD-asthma	rs9611602	22	41908405	T	C	0.2147	NA	0.943201	rs139571	ACO2	0	intronic	7.05	5
PD-asthma	rs1569516	22	41910244	C	T	0.2147	NA	0.943201	rs139571	ACO2	0	intronic	0.294	6
PD-asthma	rs9611603	22	41912750	A	G	0.2147	NA	0.943201	rs139571	ACO2	0	intronic	3.234	4
PD-asthma	rs203320	22	41913477	T	C	0.2306	NA	0.916555	rs139571	ACO2	0	intronic	3.179	NA
PD-asthma	rs17367716	22	41913844	A	G	0.2147	NA	0.943201	rs139571	ACO2	0	intronic	2.415	4
PD-asthma	rs203319	22	41914593	C	T	0.2306	NA	0.906855	rs139571	ACO2	0	intronic	5.234	NA
PD-asthma	rs203318	22	41914860	T	G	0.2326	NA	0.90755	rs139571	ACO2	0	intronic	2.867	NA
PD-asthma	rs11090049	22	41915329	C	T	0.2107	NA	0.943	rs139571	ACO2	0	intronic	0.562	5
PD-asthma	rs9611604	22	41916001	C	G	0.2117	NA	0.948747	rs139571	ACO2	0	intronic	0.834	5
PD-asthma	rs375633363	22	41917039	CAAAAAAAAAA	C	0.2217	NA	0.8968	rs139571	ACO2	0	intronic	1.341	NA
PD-asthma	rs11331024	22	41918653	GT	G	0.2137	NA	0.937638	rs139571	ACO2	0	intronic	0.119	NA
PD-asthma	rs12484694	22	41919330	A	G	0.2147	NA	0.943201	rs139571	ACO2	0	intronic	0.122	3a
PD-asthma	rs73178621	22	41921665	A	G	0.2147	NA	0.943201	rs139571	ACO2	0	intronic	2.23	4
PD-asthma	rs71772435	22	41922186	GCTGC	G	0.2137	NA	0.937638	rs139571	ACO2:POLR3H	00:00:00	UTR3	5.882	NA
PD-asthma	rs17367849	22	41923644	G	A	0.2147	NA	0.932031	rs139571	ACO2:POLR3H	00:00:00	UTR3	4.46	4
PD-asthma	rs4822032	22	41925535	T	C	0.2316	NA	0.91246	rs139571	POLR3H	0	intronic	2.188	3a
PD-asthma	rs371328828	22	41925767	G	GT	0.2256	NA	0.838672	rs139571	POLR3H	0	intronic	0.733	NA
PD-asthma	rs1810460	22	41927700	C	T	0.2147	NA	0.932031	rs139571	POLR3H	0	intronic	0.319	1f
PD-asthma	rs1810461	22	41927820	G	A	0.2147	NA	0.932031	rs139571	POLR3H	0	intronic	2.585	4
PD-asthma	rs73178625	22	41928320	G	C	0.2147	NA	0.932031	rs139571	POLR3H	0	intronic	9.721	4
PD-asthma	rs73178626	22	41928371	T	G	0.2147	NA	0.932031	rs139571	POLR3H	0	intronic	5.663	4
PD-asthma	rs4822033	22	41929960	T	G	0.2157	NA	0.926467	rs139571	POLR3H	0	intronic	3.231	6
PD-asthma	rs4822034	22	41931010	T	C	0.2157	NA	0.926467	rs139571	POLR3H	0	intronic	2.178	5
PD-asthma	rs9611606	22	41931074	A	G	0.2157	NA	0.926467	rs139571	POLR3H	0	intronic	1.994	5
PD-asthma	rs9611607	22	41932323	C	T	0.2127	NA	0.943015	rs139571	POLR3H	0	intronic	2.524	7
PD-asthma	rs116959331	22	41932774	A	G	0.2157	NA	0.926467	rs139571	POLR3H	0	intronic	1.501	7
PD-asthma	rs56319767	22	41933837	G	A	0.2157	NA	0.926467	rs139571	POLR3H	0	intronic	0.105	7
PD-asthma	rs73178632	22	41934573	C	T	0.2157	NA	0.926467	rs139571	POLR3H	0	intronic	0.613	5
PD-asthma	rs28530678	22	41934961	G	C	0.2137	NA	0.937327	rs139571	POLR3H	0	intronic	5.695	5
PD-asthma	rs12483991	22	41935285	A	G	0.2286	NA	0.915938	rs139571	POLR3H	0	intronic	4.386	4
PD-asthma	rs12483998	22	41935362	A	G	0.2157	NA	0.926467	rs139571	POLR3H	0	intronic	1.948	4
PD-asthma	rs4822035	22	41935912	G	A	0.2147	NA	0.932031	rs139571	POLR3H	0	intronic	0.168	1f
PD-asthma	rs4822036	22	41936019	A	G	0.2147	NA	0.932031	rs139571	POLR3H	0	intronic	1.634	4
PD-asthma	rs12483786	22	41938536	A	G	0.2157	NA	0.926467	rs139571	POLR3H	0	intronic	3.86	5
PD-asthma	rs12484228	22	41939739	A	G	0.2157	NA	0.926467	rs139571	POLR3H	0	intronic	10.25	3a
PD-asthma	rs11554327	22	41940371	T	G	0.2177	NA	0.915465	rs139571	POLR3H	0	UTR5	9.51	NA
PD-asthma	rs200175449	22	41940386	T	TCCACG	0.2147	NA	0.920518	rs139571	POLR3H	0	UTR5	7.03	NA
PD-asthma	rs28623192	22	41940524	A	G	0.2157	NA	0.926467	rs139571	POLR3H	0	UTR5	6.906	4
PD-asthma	rs9607812	22	41941243	G	A	0.2157	NA	0.926467	rs139571	POLR3H	632	upstream	0.272	5
PD-asthma	rs9607813	22	41941479	G	A	0.2157	NA	0.926467	rs139571	POLR3H	868	upstream	3.541	3a
PD-asthma	22:41941587:T:TTTTGTTTG	22	41941587	T	TTTTGTTTG	0.2137	NA	0.937327	rs139571	POLR3H	976	upstream	0.908	NA
PD-asthma	rs5758389	22	41941749	T	C	0.2296	NA	0.911803	rs139571	POLR3H	1138	intergenic	2.067	7
PD-asthma	rs73178638	22	41942904	T	C	0.2147	NA	0.932031	rs139571	POLR3H	2293	intergenic	3.717	6
PD-asthma	rs56904812	22	41944073	C	T	0.2157	NA	0.926467	rs139571	POLR3H	3462	intergenic	10.29	7
PD-asthma	rs4822037	22	41945113	G	T	0.2157	NA	0.926467	rs139571	POLR3H	4502	intergenic	10.51	4
PD-asthma	rs9611609	22	41945357	C	A	0.2157	NA	0.926467	rs139571	POLR3H	4746	intergenic	1.106	4
PD-asthma	rs34573218	22	41946160	CA	C	0.2147	NA	0.932031	rs139571	POLR3H	5549	intergenic	1.758	NA
PD-asthma	rs9607814	22	41946519	C	A	0.2147	NA	0.932031	rs139571	POLR3H	5908	intergenic	4.699	7
PD-asthma	rs374523118	22	41947513	AAAAC	A	0.00497	NA	0.728122	rs139571	POLR3H	6902	intergenic	1.913	NA
PD-asthma	rs578010550	22	41947513	AAAAC	AAAACAAAC	0.1839	NA	0.728122	rs139571	POLR3H	6902	NA	NA	NA
PD-asthma	rs540390143	22	41947513	AAAACAAAC	AAAACAAACAAACAAAC	0.01292	NA	0.728122	rs139571	POLR3H	6902	NA	NA	NA
PD-asthma	rs9611610	22	41949259	A	G	0.2147	NA	0.932031	rs139571	CSDC2	7507	intergenic	3.933	1d
PD-asthma	rs144461701	22	41949531	ACTC	A	0.2147	NA	0.932031	rs139571	CSDC2	7235	intergenic	9.224	NA
PD-asthma	rs9611611	22	41950175	C	T	0.2147	NA	0.932031	rs139571	CSDC2	6591	intergenic	2.161	3a
PD-asthma	rs76930421	22	41950228	T	C	0.2147	NA	0.932031	rs139571	CSDC2	6538	intergenic	5.434	5
PD-asthma	22:41950482:C:G	22	41950482	G	C	0.2137	NA	0.937638	rs139571	CSDC2	6284	intergenic	0.028	NA
PD-asthma	22:41950482:G:T	22	41950482	G	T	0.000994	NA	0.937638	rs139571	CSDC2	6284	NA	0.027	NA
PD-asthma	rs9607815	22	41950671	A	T	0.2147	NA	0.932031	rs139571	CSDC2	6095	intergenic	3.199	6
PD-asthma	rs9607816	22	41950897	G	A	0.2167	NA	0.921419	rs139571	CSDC2	5869	intergenic	0.119	6
PD-asthma	rs56364401	22	41951243	T	G	0.2177	NA	0.915972	rs139571	CSDC2	5523	intergenic	4.079	5
PD-asthma	rs73178641	22	41952075	A	T	0.2147	NA	0.932031	rs139571	CSDC2	4691	intergenic	2.24	7
PD-asthma	22:41952755:CTGTGTGTGTG:CTGTGTGTGTGTGTGTG	22	41952755	CTGTGTGTGTG	CTGTGTGTGTGTGTGTG	0.001988	NA	0.712219	rs139571	CSDC2	4011	intergenic	NA	NA
PD-asthma	rs551370270	22	41952755	CTGTGTGTGTG	CTGTGTGTG	0.2584	NA	0.712219	rs139571	CSDC2	4011	intergenic	NA	NA
PD-asthma	22:41952755:CTGTGTGTGTG:CTGTGTGTGTGTG	22	41952755	CTGTGTGTGTG	CTGTGTGTGTGTG	0.07157	NA	0.712219	rs139571	CSDC2	4011	intergenic	NA	NA
PD-asthma	rs12484175	22	41953739	A	C	0.2147	NA	0.932031	rs139571	CSDC2	3027	intergenic	4.311	5
PD-asthma	rs1972057	22	41954251	A	G	0.2167	NA	0.921419	rs139571	CSDC2	2515	intergenic	0.507	7
PD-asthma	rs12484722	22	41954824	T	C	0.2137	NA	0.937327	rs139571	CSDC2	1942	intergenic	1.728	7
PD-asthma	rs9607818	22	41954919	C	T	0.2137	NA	0.937327	rs139571	CSDC2	1847	intergenic	0.132	7
PD-asthma	rs567512590	22	41954940	CA	C	0.2406	NA	0.720134	rs139571	CSDC2	1826	intergenic	0.656	NA
PD-asthma	rs12484467	22	41957610	T	C	0.2068	NA	0.812968	rs139571	CSDC2	0	intronic	3.438	2b
PD-asthma	rs4822038	22	41958495	G	A	0.2028	NA	0.834053	rs139571	CSDC2	0	intronic	8.827	5
PD-asthma	rs9607819	22	41958862	G	C	0.2147	NA	0.825998	rs139571	CSDC2	0	intronic	3.846	1f
PD-asthma	rs369290527	22	41960091	TAA	T	0.2147	NA	0.825998	rs139571	CSDC2	0	intronic	0.384	NA
PD-asthma	rs4822039	22	41961134	G	A	0.1998	NA	0.817997	rs139571	CSDC2	0	intronic	0.007	7
PD-asthma	rs9611612	22	41961189	T	C	0.2117	NA	0.809401	rs139571	CSDC2	0	intronic	2.294	6
PD-asthma	rs9611613	22	41961831	T	C	0.2117	NA	0.809401	rs139571	CSDC2	0	intronic	6.923	1b
PD-asthma	rs12483860	22	41961916	C	T	0.2117	NA	0.809401	rs139571	CSDC2	0	intronic	1.784	2a
PD-asthma	rs12484254	22	41962003	T	A	0.2117	NA	0.809401	rs139571	CSDC2	0	intronic	8.005	4
PD-asthma	rs6002402	22	41962292	C	G	0.1978	NA	0.828698	rs139571	CSDC2	0	intronic	1.665	7
PD-asthma	rs567380043	22	41962470	A	C	0.2068	NA	0.789171	rs139571	CSDC2	0	intronic	2.737	NA
PD-asthma	rs554141972	22	41962634	CA	C	0.2038	NA	0.817024	rs139571	CSDC2	0	intronic	0.664	NA
PD-asthma	rs6002405	22	41962651	A	G	0.2505	NA	0.611537	rs139571	CSDC2	0	intronic	2.464	6
PD-asthma	rs9611615	22	41962793	T	C	0.2117	NA	0.809401	rs139571	CSDC2	0	intronic	0.68	7
PD-asthma	rs4822040	22	41963553	C	G	0.2117	NA	0.809401	rs139571	CSDC2	0	intronic	2.595	5
PD-asthma	rs73178647	22	41964168	G	A	0.1998	NA	0.817997	rs139571	CSDC2	0	intronic	3.393	7
PD-asthma	rs7290990	22	41964357	C	A	0.2117	NA	0.809401	rs139571	CSDC2	0	intronic	1.475	7
PD-asthma	rs7290991	22	41964361	C	G	0.2117	NA	0.809401	rs139571	CSDC2	0	intronic	1.695	7
PD-asthma	rs6002406	22	41965237	A	T	0.1998	NA	0.817997	rs139571	CSDC2	0	intronic	1.001	5
PD-asthma	rs5996037	22	41965292	A	G	0.2117	NA	0.809401	rs139571	CSDC2	0	intronic	1.776	5
PD-asthma	rs5996038	22	41965300	T	C	0.2117	NA	0.809401	rs139571	CSDC2	0	intronic	5.611	5
PD-asthma	rs2064164	22	41966673	C	A	0.2097	NA	0.799172	rs139571	CSDC2	0	intronic	1.455	7
PD-asthma	rs527329866	22	41966986	C	CA	0.161	NA	0.646954	rs139571	CSDC2	0	intronic	1.715	NA
PD-asthma	rs6002408	22	41967870	C	T	0.2078	NA	0.789062	rs139571	CSDC2	0	UTR5	4.017	5
PD-asthma	rs1006407	22	41972032	T	C	0.1968	NA	0.823631	rs139571	CSDC2	0	UTR3	5.014	5
PD-asthma	rs4822043	22	41976939	T	C	0.2127	NA	0.805355	rs139571	PMM1	0	intronic	0.611	7
PD-asthma	rs4822044	22	41979668	G	C	0.1978	NA	0.818608	rs139571	PMM1	0	intronic	8.835	6
PD-asthma	rs4481089	22	41980892	T	C	0.2107	NA	0.795165	rs139571	PMM1	0	intronic	6.508	5
PD-asthma	rs5996039	22	41981957	A	G	0.2097	NA	0.799172	rs139571	PMM1	0	intronic	4.283	1f
PD-asthma	rs9611618	22	41982475	A	T	0.2107	NA	0.795165	rs139571	PMM1	0	intronic	0.038	6
PD-asthma	rs2076200	22	41985956	G	T	0.1948	NA	0.834724	rs139571	PMM1	61	upstream	5.805	2b
PD-asthma	rs4822045	22	41985958	C	A	0.1948	NA	0.834724	rs139571	PMM1	63	upstream	5.986	2b
PD-asthma	rs9611619	22	41986714	C	T	0.1948	NA	0.834724	rs139571	PMM1	819	upstream	7.748	5
PD-asthma	rs4822046	22	41987543	G	A	0.1968	NA	0.823631	rs139571	PMM1	1648	intergenic	16.44	5
PD-asthma	rs57102627	22	41987627	T	C	0.2107	NA	0.795165	rs139571	PMM1	1732	intergenic	2.643	5
PD-asthma	rs4822047	22	41987937	C	A	0.2256	NA	0.729001	rs139571	PMM1	2042	intergenic	0.023	6
PD-asthma	rs4822048	22	41988225	C	T	0.1948	NA	0.834724	rs139571	PMM1	2330	intergenic	3.27	4
PD-asthma	rs28750375	22	41990644	A	C	0.2107	NA	0.795165	rs139571	DESI1	3387	intergenic	1.297	4
PD-asthma	rs8139993	22	41995335	T	C	0.2107	NA	0.795165	rs139571	DESI1	0	UTR3	1.993	1f
PD-asthma	rs148894219	22	41996131	C	T	0.1948	NA	0.834724	rs139571	DESI1	0	UTR3	3.87	6
PD-asthma	rs145063118	22	41997585	AAAG	A	0.2018	NA	0.806005	rs139571	DESI1	0	intronic	7.551	NA
PD-asthma	rs80477	22	42001183	T	C	0.2107	NA	0.794001	rs139571	DESI1	0	intronic	0.529	7
PD-asthma	rs132761	22	42004371	T	C	0.1968	NA	0.823631	rs139571	DESI1	0	intronic	3.599	7
PD-asthma	rs132765	22	42008068	G	A	0.1938	NA	0.829672	rs139571	DESI1	0	intronic	5.055	6
PD-asthma	rs132767	22	42009520	C	T	0.1958	NA	0.818594	rs139571	DESI1	0	intronic	9.995	3a
PD-asthma	rs8135299	22	42010623	T	C	0.2097	NA	0.790115	rs139571	DESI1	0	intronic	7.148	7
PD-asthma	rs7284839	22	42010902	T	C	0.1958	NA	0.818594	rs139571	DESI1	0	intronic	0.907	6
PD-asthma	rs132768	22	42013523	A	C	0.1958	NA	0.818594	rs139571	DESI1	0	intronic	7.304	6
PD-asthma	rs5751129	22	42015765	T	C	0.2097	NA	0.790115	rs139571	DESI1	0	intronic	8.301	1f
PD-asthma	rs132770	22	42017264	G	A	0.1958	NA	0.81794	rs139571	XRCC6	0	UTR5	8.961	4
PD-asthma	rs5758397	22	42019251	T	C	0.1958	NA	0.818594	rs139571	XRCC6	0	intronic	2.883	6
PD-asthma	rs13055759	22	42022035	G	C	0.1958	NA	0.818594	rs139571	XRCC6	0	intronic	5.872	7
PD-asthma	rs132771	22	42025350	G	A	0.1958	NA	0.818594	rs139571	XRCC6	0	intronic	0.265	5
PD-asthma	rs5758398	22	42028125	G	A	0.2097	NA	0.790115	rs139571	XRCC6	0	intronic	2.82	6
PD-asthma	rs132772	22	42031712	GT	G	0.2107	NA	0.785011	rs139571	XRCC6	0	intronic	1.567	NA
PD-asthma	rs132773	22	42031768	A	T	0.1958	NA	0.818594	rs139571	XRCC6	0	intronic	1.278	7
PD-asthma	rs132774	22	42031953	G	C	0.2097	NA	0.790115	rs139571	XRCC6	0	intronic	0.04	7
PD-asthma	rs132776	22	42036374	C	T	0.1948	NA	0.823781	rs139571	XRCC6	0	intronic	0.906	6
PD-asthma	rs132777	22	42037309	A	AC	0.2097	NA	0.790115	rs139571	XRCC6	0	intronic	0.088	NA
PD-asthma	rs132779	22	42038640	G	A	0.1958	NA	0.818594	rs139571	XRCC6	0	intronic	4.286	5
PD-asthma	rs9611636	22	42041310	A	C	0.2008	NA	0.781728	rs139571	XRCC6	0	intronic	3.447	5
PD-asthma	rs16384	22	42045009	AAAC	A	0.1829	NA	0.742456	rs139571	XRCC6	0	intronic	2.057	NA
PD-asthma	rs34374816	22	42045853	A	AT	0.1958	NA	0.726791	rs139571	XRCC6	0	intronic	1.007	NA
PD-asthma	rs132781	22	42046122	G	T	0.1829	NA	0.742456	rs139571	XRCC6	0	intronic	0.441	6
PD-asthma	rs16383	22	42048250	A	ATCT	0.2028	NA	0.69222	rs139571	XRCC6	0	intronic	4.862	NA
PD-asthma	rs28741130	22	42048702	CAG	C	0.1819	NA	0.73692	rs139571	XRCC6	0	intronic	1.642	NA
PD-asthma	rs5751135	22	42048866	C	T	0.1819	NA	0.73692	rs139571	XRCC6	0	intronic	0.235	6
PD-asthma	rs11434965	22	42051719	G	GT	0.1958	NA	0.715456	rs139571	XRCC6	0	intronic	0.636	NA
PD-asthma	rs132784	22	42052363	A	G	0.1819	NA	0.73692	rs139571	XRCC6	0	intronic	1.543	7
PD-asthma	rs132786	22	42058846	A	G	0.1978	NA	0.726267	rs139571	XRCC6	0	intronic	2.992	7
PD-asthma	rs132787	22	42058949	A	G	0.1978	NA	0.726267	rs139571	XRCC6	0	intronic	1.398	6
PD-asthma	rs132790	22	42061562	T	C	0.2137	NA	0.78126	rs139571	XRCC6	1517	intergenic	0.159	5
PD-asthma	rs34077262	22	42061639	G	A	0.2107	NA	0.804271	rs139571	XRCC6	1594	intergenic	0.353	5
PD-asthma	rs132792	22	42062822	T	C	0.2207	NA	0.760049	rs139571	XRCC6	2777	intergenic	5.622	2a
PD-asthma	rs132793	22	42063681	G	A	0.1918	NA	0.797306	rs139571	XRCC6	3636	intergenic	1.11	4
PD-asthma	rs576290205	22	42063823	ATG	ATTTG	0.2097	NA	0.808438	rs139571	XRCC6	3778	intergenic	NA	NA
PD-asthma	rs132796	22	42063961	G	A	0.1988	NA	0.812183	rs139571	XRCC6	3916	intergenic	2.976	5
PD-asthma	rs132797	22	42064765	G	A	0.1988	NA	0.812183	rs139571	XRCC6	4720	intergenic	4.419	7
PD-asthma	rs132798	22	42064901	A	G	0.2207	NA	0.760049	rs139571	XRCC6	4856	intergenic	1.548	7
PD-asthma	rs132802	22	42067864	A	G	0.2207	NA	0.760049	rs139571	NHP2L1	2069	intergenic	2.813	6
PD-asthma	rs132803	22	42068469	G	A	0.2097	NA	0.808438	rs139571	NHP2L1	1464	intergenic	4.245	5
PD-asthma	rs132804	22	42068510	A	G	0.2097	NA	0.808438	rs139571	NHP2L1	1423	intergenic	2.07	5
PD-asthma	rs132805	22	42068602	C	T	0.1988	NA	0.812183	rs139571	NHP2L1	1331	intergenic	0.658	5
PD-asthma	rs8779	22	42070276	C	T	0.1968	NA	0.823631	rs139571	NHP2L1	0	UTR3	5.29	NA
PD-asthma	rs132807	22	42071584	C	T	0.1978	NA	0.817883	rs139571	NHP2L1	0	intronic	3.829	7
PD-asthma	rs1807497	22	42072912	A	C	0.2097	NA	0.808438	rs139571	NHP2L1	0	intronic	12.89	7
PD-asthma	rs1811113	22	42073134	T	C	0.1978	NA	0.817883	rs139571	NHP2L1	0	intronic	7.991	5
PD-asthma	rs949438	22	42074042	C	A	0.1978	NA	0.817883	rs139571	NHP2L1	0	intronic	1.608	7
PD-asthma	rs7285944	22	42074214	T	C	0.2117	NA	0.798	rs139571	NHP2L1	0	intronic	2.107	6
PD-asthma	rs5996050	22	42074215	G	A	0.2008	NA	0.800926	rs139571	NHP2L1	0	intronic	3.288	6
PD-asthma	rs5758404	22	42075300	A	G	0.2187	NA	0.76811	rs139571	NHP2L1	0	intronic	3.661	6
PD-asthma	rs5751136	22	42075581	A	T	0.2008	NA	0.79121	rs139571	NHP2L1	0	intronic	0.688	6
PD-asthma	rs5758405	22	42076381	A	C	0.2097	NA	0.808438	rs139571	NHP2L1	0	intronic	1.121	1f
PD-asthma	rs5758406	22	42076641	G	A	0.2087	NA	0.813718	rs139571	NHP2L1	0	intronic	9.177	7
PD-asthma	rs5758407	22	42076956	T	C	0.2097	NA	0.808438	rs139571	NHP2L1	0	intronic	2.043	7
PD-asthma	rs5758408	22	42077737	C	A	0.1988	NA	0.812183	rs139571	NHP2L1	0	intronic	0.802	4
PD-asthma	rs5758409	22	42077858	A	G	0.2197	NA	0.763321	rs139571	NHP2L1	0	intronic	4.271	3a
PD-asthma	rs575060615	22	42077994	CTTTT	CTTTTT	0.2018	NA	0.783915	rs139571	NHP2L1	0	intronic	NA	NA
PD-asthma	rs6519270	22	42078666	G	A	0.2127	NA	0.786258	rs139571	NHP2L1	0	intronic	5.561	4
PD-asthma	rs5758411	22	42079734	A	G	0.2177	NA	0.772934	rs139571	NHP2L1	0	intronic	1.399	5
PD-asthma	rs2157287	22	42080188	C	T	0.2078	NA	0.81904	rs139571	NHP2L1	0	intronic	4.782	6
PD-asthma	rs5758412	22	42080803	A	T	0.1968	NA	0.823631	rs139571	NHP2L1	0	intronic	1.118	7
PD-asthma	rs5758414	22	42081063	A	G	0.2177	NA	0.772934	rs139571	NHP2L1	0	intronic	2.363	7
PD-asthma	rs13055632	22	42081603	G	A	0.1988	NA	0.812947	rs139571	NHP2L1	0	intronic	4.133	6
PD-asthma	rs13055804	22	42081620	T	C	0.1968	NA	0.823631	rs139571	NHP2L1	0	intronic	2.596	7
PD-asthma	rs13057349	22	42081697	C	T	0.1968	NA	0.823631	rs139571	NHP2L1	0	intronic	3.131	6
PD-asthma	rs13056262	22	42081921	G	A	0.1968	NA	0.823631	rs139571	NHP2L1	0	intronic	1.504	6
PD-asthma	rs5758415	22	42082497	C	T	0.1958	NA	0.81794	rs139571	NHP2L1	0	intronic	5.966	6
PD-asthma	rs5758416	22	42082791	C	T	0.1988	NA	0.812183	rs139571	NHP2L1	0	intronic	0.539	7
PD-asthma	rs35648432	22	42087273	T	TC	0.2028	NA	0.824198	rs139571	C22orf46	0	intronic	0.147	NA
PD-asthma	rs58980344	22	42087275	T	TC	0.2028	NA	0.824198	rs139571	C22orf46	0	intronic	0.204	NA
PD-asthma	rs35992965	22	42087594	T	TA	0.1978	NA	0.817883	rs139571	C22orf46	0	intronic	1.334	NA
PD-asthma	rs10775759	22	42088158	C	T	0.2078	NA	0.81904	rs139571	C22orf46	0	intronic	5.357	7
PD-asthma	rs71709375	22	42088406	A	ATTTC	0.2078	NA	0.768755	rs139571	C22orf46	0	intronic	6.028	NA
PD-asthma	rs5758420	22	42088581	G	A	0.1968	NA	0.812148	rs139571	C22orf46	0	intronic	2.642	6
PD-asthma	rs739134	22	42089623	C	T	0.2068	NA	0.812968	rs139571	C22orf46	0	exonic	10.97	1f
PD-asthma	rs739135	22	42090069	C	A	0.1958	NA	0.81794	rs139571	C22orf46	0	UTR3	5.925	6
PD-asthma	rs35117663	22	42091027	AAG	A	0.2107	NA	0.783797	rs139571	C22orf46:Z83840.1	00:00:00	ncRNA_exonic	16.28	NA
PD-asthma	rs2187795	22	42092225	A	C	0.1968	NA	0.812148	rs139571	C22orf46	0	UTR3	3.041	5
PD-asthma	rs575223402	22	42094921	CTTTT	C	0.1968	NA	0.781831	rs139571	MEI1	581	upstream	1.672	NA
PD-asthma	rs2003816	22	42095140	G	T	0.2147	NA	0.756444	rs139571	MEI1	362	upstream	0.1	NA
PD-asthma	rs11090056	22	42095904	C	A	0.2147	NA	0.756444	rs139571	MEI1	0	intronic	5.138	5
PD-asthma	rs66702434	22	42096583	C	CCTCGGCTTCCCATAGTG	0.2177	NA	0.761639	rs139571	MEI1	0	intronic	2.035	NA
PD-asthma	rs554588358	22	42096753	A	ATTTTTTTTT	0.164	NA	0.664915	rs139571	MEI1	0	intronic	5.35	NA
PD-asthma	rs2413652	22	42097238	T	C	0.2167	NA	0.76649	rs139571	MEI1	0	intronic	0.296	5
PD-asthma	rs8138780	22	42097462	T	A	0.1958	NA	0.81794	rs139571	MEI1	0	intronic	0.358	6
PD-asthma	rs5758426	22	42098763	G	T	0.2107	NA	0.785011	rs139571	MEI1	0	intronic	0.057	6
PD-asthma	rs5758427	22	42099688	G	A	0.2068	NA	0.812968	rs139571	MEI1	0	intronic	1.273	6
PD-asthma	rs5751139	22	42099981	C	G	0.1958	NA	0.81794	rs139571	MEI1	0	intronic	1.91	7
PD-asthma	rs739136	22	42100275	G	A	0.1968	NA	0.812148	rs139571	MEI1	0	intronic	5.401	1f
PD-asthma	rs6002445	22	42100681	G	A	0.1968	NA	0.812148	rs139571	MEI1	0	intronic	3.264	7
PD-asthma	rs2097413	22	42101815	A	G	0.2217	NA	0.744111	rs139571	MEI1	0	intronic	0.08	7
PD-asthma	rs531280083	22	42103032	C	CAAAAAAAAA	0.1998	NA	0.787176	rs139571	MEI1	0	intronic	0.796	NA
PD-asthma	rs1988153	22	42104929	G	A	0.2078	NA	0.796185	rs139571	MEI1	0	intronic	10.18	7
PD-asthma	rs5758428	22	42106216	A	G	0.1968	NA	0.800667	rs139571	MEI1	0	intronic	3.135	5
PD-asthma	rs2413653	22	42106996	C	T	0.1958	NA	0.806452	rs139571	MEI1	0	intronic	1.915	5
PD-asthma	rs2413654	22	42107262	C	T	0.1958	NA	0.806452	rs139571	MEI1	0	intronic	0.247	7
PD-asthma	rs5751141	22	42107745	G	A	0.1958	NA	0.806452	rs139571	MEI1	0	intronic	6.245	1f
PD-asthma	rs7364264	22	42108253	T	C	0.1958	NA	0.806452	rs139571	MEI1	0	intronic	1.08	6
PD-asthma	rs5758430	22	42109844	T	G	0.2078	NA	0.807611	rs139571	MEI1	0	intronic	1.468	7
PD-asthma	rs5758431	22	42109917	G	A	0.2078	NA	0.807611	rs139571	MEI1	0	intronic	4.498	5
PD-asthma	rs66525745	22	42110720	C	CA	0.2048	NA	0.766591	rs139571	MEI1	0	intronic	2.933	NA
PD-asthma	rs5758432	22	42111693	C	T	0.1938	NA	0.817654	rs139571	MEI1	0	intronic	0.057	7
PD-asthma	rs9306355	22	42111896	T	A	0.2177	NA	0.761639	rs139571	MEI1	0	intronic	2.503	7
PD-asthma	rs1807668	22	42112599	C	T	0.1968	NA	0.812148	rs139571	MEI1	0	intronic	2.866	6
PD-asthma	rs55994680	22	42112690	C	CT	0.2087	NA	0.747429	rs139571	MEI1	0	intronic	1.358	NA
PD-asthma	22:42115050:A:G	22	42115050	G	A	0.2008	NA	0.789467	rs139571	MEI1	0	intronic	1.351	6
PD-asthma	rs5758434	22	42116163	A	G	0.2187	NA	0.76811	rs139571	MEI1	0	intronic	9.099	5
PD-asthma	rs5996054	22	42117065	G	A	0.1968	NA	0.812148	rs139571	MEI1	0	intronic	1.886	7
PD-asthma	rs57977638	22	42117568	A	AT	0.1958	NA	0.806452	rs139571	MEI1	0	intronic	0.031	NA
PD-asthma	rs739129	22	42118249	A	G	0.1988	NA	0.812183	rs139571	MEI1	0	intronic	1.976	7
PD-asthma	rs11285552	22	42119222	G	GT	0.2078	NA	0.772364	rs139571	MEI1	0	intronic	0.33	NA
PD-asthma	rs540175683	22	42121125	A	AT	0.007952	NA	0.775125	rs139571	MEI1	0	intronic	1.372	NA
PD-asthma	rs12159188	22	42121125	T	A	0.2167	NA	0.775125	rs139571	MEI1	0	NA	0.034	6
PD-asthma	rs2011053	22	42121278	A	G	0.2187	NA	0.756825	rs139571	MEI1	0	intronic	2.704	7
PD-asthma	rs5845506	22	42122754	T	TA	0.2177	NA	0.751785	rs139571	MEI1	0	intronic	0.42	NA
PD-asthma	rs1807669	22	42122926	T	C	0.2177	NA	0.751785	rs139571	MEI1	0	intronic	1.159	7
PD-asthma	rs739132	22	42123099	T	A	0.1968	NA	0.801369	rs139571	MEI1	0	intronic	1.221	7
PD-asthma	rs738422	22	42123399	T	C	0.2177	NA	0.751785	rs139571	MEI1	0	intronic	6.988	7
PD-asthma	rs60247043	22	42123615	C	CA	0.1968	NA	0.801369	rs139571	MEI1	0	intronic	0.91	NA
PD-asthma	rs2092274	22	42123737	G	A	0.2078	NA	0.797185	rs139571	MEI1	0	intronic	3.596	7
PD-asthma	rs5758436	22	42124265	T	C	0.1968	NA	0.801369	rs139571	MEI1	0	intronic	3.097	5
PD-asthma	rs7291736	22	42124874	A	C	0.1978	NA	0.806406	rs139571	MEI1	0	intronic	1.472	5
PD-asthma	rs5758437	22	42125147	T	C	0.2078	NA	0.797185	rs139571	MEI1	0	intronic	2.984	7
PD-asthma	rs5845507	22	42127525	AT	A	0.2177	NA	0.751785	rs139571	MEI1	0	intronic	0.958	NA
PD-asthma	rs2064189	22	42127999	C	T	0.2167	NA	0.756601	rs139571	MEI1	0	intronic	2.043	1f
PD-asthma	rs5751144	22	42128097	A	G	0.2177	NA	0.751785	rs139571	MEI1	0	intronic	10.59	1f
PD-asthma	rs2413656	22	42129357	T	G	0.2187	NA	0.756825	rs139571	MEI1	0	intronic	1.943	7
PD-asthma	rs2092275	22	42129964	C	T	0.1968	NA	0.812148	rs139571	MEI1	0	intronic	5.868	6
PD-asthma	rs13054514	22	42130383	G	A	0.2177	NA	0.761639	rs139571	MEI1	0	intronic	6.117	6
PD-asthma	rs5758439	22	42131762	T	C	0.1978	NA	0.817883	rs139571	MEI1	0	intronic	8.125	5
PD-asthma	rs5758440	22	42132481	C	T	0.2187	NA	0.76811	rs139571	MEI1	0	intronic	2.842	7
PD-asthma	rs5758441	22	42132888	A	C	0.2187	NA	0.76811	rs139571	MEI1	0	intronic	0.01	5
PD-asthma	rs5758442	22	42133060	C	T	0.2187	NA	0.76811	rs139571	MEI1	0	intronic	11.28	5
PD-asthma	rs5758443	22	42133443	A	G	0.1978	NA	0.817883	rs139571	MEI1	0	intronic	4.168	7
PD-asthma	rs5751145	22	42133552	T	C	0.1958	NA	0.828837	rs139571	MEI1	0	intronic	2.137	6
PD-asthma	rs5758444	22	42133921	A	T	0.1978	NA	0.817883	rs139571	MEI1	0	intronic	0.029	6
PD-asthma	rs2413657	22	42134790	A	T	0.2058	NA	0.77675	rs139571	MEI1	0	intronic	1.092	6
PD-asthma	rs2899346	22	42134895	C	T	0.1978	NA	0.817883	rs139571	MEI1	0	intronic	2.494	7
PD-asthma	rs11297750	22	42135144	C	CA	0.2048	NA	0.778962	rs139571	MEI1	0	intronic	4.985	NA
PD-asthma	rs768414	22	42135751	C	T	0.1968	NA	0.812843	rs139571	MEI1	0	intronic	9.113	NA
PD-asthma	rs8141103	22	42136930	C	T	0.1958	NA	0.807115	rs139571	MEI1	0	intronic	3.332	5
PD-asthma	22:42138106:A:G	22	42138106	A	G	0.1988	NA	0.812183	rs139571	MEI1	0	intronic	4.993	7
PD-asthma	22:42138106:G:T	22	42138106	G	T	0.000994	NA	0.812183	rs139571	MEI1	0	NA	4.211	NA
PD-asthma	rs5758447	22	42138200	T	G	0.2187	NA	0.76811	rs139571	MEI1	0	intronic	0.766	6
PD-asthma	rs5751147	22	42139054	A	G	0.1988	NA	0.812183	rs139571	MEI1	0	intronic	3.527	4
PD-asthma	rs5751148	22	42139078	G	A	0.1978	NA	0.817883	rs139571	MEI1	0	intronic	14.28	4
PD-asthma	rs10706108	22	42139461	G	GA	0.1978	NA	0.817883	rs139571	MEI1	0	intronic	0.49	NA
PD-asthma	rs5751149	22	42139501	G	A	0.1978	NA	0.817883	rs139571	MEI1	0	intronic	0.845	5
PD-asthma	rs5758449	22	42140160	T	C	0.2197	NA	0.763321	rs139571	MEI1	0	intronic	1.077	7
PD-asthma	rs56663311	22	42140792	A	G	0.1988	NA	0.812183	rs139571	MEI1	0	intronic	3.741	7
PD-asthma	rs62236786	22	42140793	T	C	0.1988	NA	0.812183	rs139571	MEI1	0	intronic	2.039	7
PD-asthma	rs56138604	22	42140798	A	G	0.1998	NA	0.806531	rs139571	MEI1	0	intronic	3.785	7
PD-asthma	rs58323591	22	42140800	CTTTG	C	0.1998	NA	0.806531	rs139571	MEI1	0	intronic	1.443	NA
PD-asthma	rs5996058	22	42141452	G	A	0.1968	NA	0.812148	rs139571	MEI1	0	intronic	2.724	7
PD-asthma	rs5758450	22	42141640	A	G	0.1978	NA	0.806406	rs139571	MEI1	0	intronic	5.208	5
PD-asthma	rs964898	22	42142306	C	T	0.1978	NA	0.817883	rs139571	MEI1	0	intronic	5.164	1f
PD-asthma	rs964899	22	42142386	A	G	0.1958	NA	0.828837	rs139571	MEI1	0	intronic	1.607	7
PD-asthma	rs146710794	22	42143053	TATAATA	T	0.2217	NA	0.753847	rs139571	MEI1	0	intronic	7.03	NA
PD-asthma	rs1883368	22	42143537	A	G	0.2187	NA	0.76811	rs139571	MEI1	0	intronic	3.372	7
PD-asthma	rs1883369	22	42143572	G	A	0.1968	NA	0.812148	rs139571	MEI1	0	intronic	3.095	6
PD-asthma	rs1883370	22	42143740	A	C	0.2078	NA	0.77334	rs139571	MEI1	0	intronic	0.666	6
PD-asthma	rs55688502	22	42144512	AC	A	0.2107	NA	0.794001	rs139571	MEI1	0	intronic	5.419	NA
PD-asthma	rs5758452	22	42144927	A	G	0.2197	NA	0.763321	rs139571	MEI1	0	intronic	0.211	6
PD-asthma	rs1807725	22	42147725	G	A	0.1968	NA	0.812148	rs139571	MEI1	0	intronic	0.074	6
PD-asthma	rs715498	22	42148467	A	G	0.1978	NA	0.806406	rs139571	MEI1	0	intronic	0.701	4
PD-asthma	rs1534932	22	42150146	T	C	0.1958	NA	0.81794	rs139571	MEI1	0	intronic	2.033	1f
PD-asthma	rs2050031	22	42152266	G	A	0.1978	NA	0.806406	rs139571	MEI1	0	intronic	4.432	7
PD-asthma	rs2050032	22	42152429	T	C	0.2068	NA	0.761316	rs139571	MEI1	0	intronic	0.663	5
PD-asthma	rs5751150	22	42153292	G	T	0.1978	NA	0.806406	rs139571	MEI1	0	intronic	2.943	7
PD-asthma	rs5758458	22	42154132	A	G	0.1978	NA	0.806406	rs139571	MEI1	0	intronic	0.676	6
PD-asthma	rs202130156	22	42155636	A	AAAAT	0.1958	NA	0.807115	rs139571	MEI1	0	intronic	2.7	NA
PD-asthma	rs5751151	22	42156269	A	G	0.2167	NA	0.756601	rs139571	MEI1	0	intronic	0.986	6
PD-asthma	rs4401299	22	42156517	G	A	0.2167	NA	0.756601	rs139571	MEI1	0	intronic	3.593	6
PD-asthma	rs5751153	22	42156561	C	T	0.1958	NA	0.807115	rs139571	MEI1	0	intronic	2.237	7
PD-asthma	rs5758459	22	42157081	C	T	0.1958	NA	0.807115	rs139571	MEI1	0	intronic	3.589	6
PD-asthma	rs2899347	22	42158204	C	T	0.1948	NA	0.823781	rs139571	MEI1	0	intronic	0.132	6
PD-asthma	rs713988	22	42159072	G	A	0.1968	NA	0.812843	rs139571	MEI1	0	intronic	10.63	4
PD-asthma	rs737749	22	42159073	C	T	0.1968	NA	0.812843	rs139571	MEI1	0	intronic	10.58	4
PD-asthma	rs2050033	22	42159229	T	G	0.1968	NA	0.812843	rs139571	MEI1	0	exonic	14.73	2b
PD-asthma	rs2064188	22	42160050	T	C	0.2177	NA	0.763062	rs139571	MEI1	0	intronic	1.306	7
PD-asthma	rs5758461	22	42162189	C	G	0.1958	NA	0.807115	rs139571	MEI1	0	intronic	0.016	6
PD-asthma	rs11323279	22	42164394	C	CA	0.2157	NA	0.709476	rs139571	MEI1	0	intronic	2.568	NA
PD-asthma	rs2899348	22	42164516	G	C	0.1968	NA	0.801369	rs139571	MEI1	0	intronic	0.009	4
PD-asthma	rs2899349	22	42164660	C	T	0.1958	NA	0.807115	rs139571	MEI1	0	intronic	0.989	4
PD-asthma	rs2413659	22	42164862	G	A	0.2187	NA	0.748498	rs139571	MEI1	0	intronic	3.472	5
PD-asthma	rs1983576	22	42166486	A	G	0.1958	NA	0.807115	rs139571	MEI1	0	intronic	6.889	6
PD-asthma	rs5996062	22	42167464	G	C	0.1958	NA	0.807115	rs139571	MEI1	0	intronic	0.471	7
PD-asthma	rs11421181	22	42167614	CT	C	0.2127	NA	0.727003	rs139571	MEI1	0	intronic	1.193	NA
PD-asthma	rs6002474	22	42168181	G	A	0.1958	NA	0.807115	rs139571	MEI1	0	intronic	3.633	7
PD-asthma	rs5996063	22	42168767	A	G	0.1968	NA	0.812148	rs139571	MEI1	0	intronic	3.122	2b
PD-asthma	rs6519288	22	42169618	A	G	0.2197	NA	0.753517	rs139571	MEI1	0	intronic	0.767	7
PD-asthma	rs5751156	22	42170025	G	A	0.1958	NA	0.807115	rs139571	MEI1	0	intronic	10.15	6
PD-asthma	rs6519289	22	42170432	C	A	0.1958	NA	0.807115	rs139571	MEI1	0	intronic	0.299	5
PD-asthma	rs5758464	22	42171300	C	T	0.1958	NA	0.807115	rs139571	MEI1	0	intronic	0.478	6
PD-asthma	rs55810731	22	42174305	AT	A	0.2177	NA	0.761639	rs139571	MEI1	0	intronic	1.683	NA
PD-asthma	rs9623450	22	42175231	A	G	0.2177	NA	0.761639	rs139571	MEI1	0	intronic	0.455	7
PD-asthma	rs5758465	22	42175314	C	T	0.1958	NA	0.807115	rs139571	MEI1	0	intronic	0.323	6
PD-asthma	rs5751159	22	42175365	A	G	0.2187	NA	0.756825	rs139571	MEI1	0	intronic	2.598	6
PD-asthma	rs5751160	22	42175695	G	A	0.1968	NA	0.812148	rs139571	MEI1	0	intronic	6.869	4
PD-asthma	rs5758466	22	42176059	A	G	0.2187	NA	0.756825	rs139571	MEI1	0	intronic	0.352	5
PD-asthma	rs560434518	22	42176580	C	T	0.2525	NA	0.626999	rs139571	MEI1	0	intronic	0.159	NA
PD-asthma	rs200526451	22	42176584	TC	T	0.2525	NA	0.626999	rs139571	MEI1	0	intronic	0.697	NA
PD-asthma	rs6002480	22	42176917	A	T	0.2227	NA	0.733072	rs139571	MEI1	0	intronic	5.083	4
PD-asthma	rs4822050	22	42177453	G	C	0.2177	NA	0.751785	rs139571	MEI1	0	intronic	6.83	1f
PD-asthma	rs45500192	22	42177899	A	G	0.1948	NA	0.802111	rs139571	MEI1	0	intronic	9.48	5
PD-asthma	rs139540	22	42178040	C	T	0.2157	NA	0.751592	rs139571	MEI1	0	intronic	5.742	5
PD-asthma	rs126092	22	42178441	G	A	0.2157	NA	0.751592	rs139571	MEI1	0	intronic	3.841	1f
PD-asthma	rs10676540	22	42180891	T	TTGAG	0.2187	NA	0.756825	rs139571	MEI1	0	intronic	8.566	NA
PD-asthma	22:42180929:T:TTTTA	22	42180929	T	TTTTA	0.1968	NA	0.812148	rs139571	MEI1	0	NA	0.582	NA
PD-asthma	22:42180929:T:TTTTATTTATTTA	22	42180929	T	TTTTATTTATTTA	0.008946	NA	0.812148	rs139571	MEI1	0	intronic	0.473	NA
PD-asthma	rs138457901	22	42181245	TTTTA	T	0.2058	NA	0.787052	rs139571	MEI1	0	intronic	1.108	NA
PD-asthma	rs139545	22	42181498	T	C	0.1968	NA	0.812148	rs139571	MEI1	0	intronic	2.202	6
PD-asthma	rs139550	22	42181938	G	A	0.1948	NA	0.802111	rs139571	MEI1	0	intronic	0.923	7
PD-asthma	rs139551	22	42182007	C	T	0.1978	NA	0.817883	rs139571	MEI1	0	intronic	0.683	6
PD-asthma	rs9607841	22	42186838	G	A	0.1948	NA	0.802111	rs139571	MEI1	0	intronic	0.35	6
PD-asthma	rs9611667	22	42187015	C	T	0.1938	NA	0.818754	rs139571	MEI1	0	intronic	0.814	5
PD-asthma	rs139553	22	42187199	C	T	0.2167	NA	0.758044	rs139571	MEI1	0	intronic	0.366	1f
PD-asthma	rs139559	22	42191636	A	G	0.2177	NA	0.751785	rs139571	MEI1	0	intronic	7.297	7
PD-asthma	rs73163343	22	42192482	G	A	0.1958	NA	0.807115	rs139571	MEI1	0	intronic	7.175	7
PD-asthma	rs9607842	22	42192722	G	A	0.1958	NA	0.807115	rs139571	MEI1	0	intronic	3.681	6
PD-asthma	rs4822052	22	42193741	G	A	0.2068	NA	0.802502	rs139571	MEI1	0	intronic	3.136	6
PD-asthma	rs4820443	22	42193913	T	C	0.1968	NA	0.812843	rs139571	MEI1	0	intronic	11.24	1f
PD-asthma	rs139560	22	42194962	A	G	0.1978	NA	0.80714	rs139571	MEI1	0	intronic	0.826	5
PD-asthma	rs139561	22	42195410	T	C	0.1968	NA	0.812843	rs139571	MEI1	0	UTR3	13.35	1f
PD-asthma	rs139562	22	42196684	G	C	0.1968	NA	0.812843	rs139571	CCDC134	0	UTR5	9.145	4
PD-asthma	rs138345162	22	42198383	AGGAGTCTCCAGTTGGAGACTG	A	0.1958	NA	0.807115	rs139571	CCDC134	0	intronic	6.293	NA
PD-asthma	rs369943939	22	42198404	G	A	0.1938	NA	0.797136	rs139571	CCDC134	0	intronic	8.491	5
PD-asthma	rs139564	22	42198896	C	T	0.1978	NA	0.817883	rs139571	CCDC134	0	intronic	0.205	7
PD-asthma	rs139566	22	42199277	A	G	0.1958	NA	0.807115	rs139571	CCDC134	0	intronic	9.75	7
PD-asthma	rs73163354	22	42200916	A	G	0.1958	NA	0.807115	rs139571	CCDC134	0	intronic	3.734	6
PD-asthma	rs4820444	22	42202606	G	A	0.1958	NA	0.807115	rs139571	CCDC134	0	intronic	11.02	1f
PD-asthma	rs112524762	22	42202944	G	A	0.1958	NA	0.807115	rs139571	CCDC134	0	intronic	2.932	6
PD-asthma	rs9611671	22	42204113	G	A	0.1958	NA	0.807115	rs139571	CCDC134	0	intronic	2.355	5
PD-asthma	rs4512	22	42206084	G	C	0.1948	NA	0.823224	rs139571	CCDC134	0	intronic	10.7	5
PD-asthma	rs140944785	22	42208640	GTAAT	G	0.1968	NA	0.812843	rs139571	CCDC134	0	intronic	0.99	NA
PD-asthma	rs9611672	22	42209922	A	G	0.1958	NA	0.807115	rs139571	CCDC134	0	intronic	8.719	5
PD-asthma	rs139569	22	42211141	A	G	0.2256	NA	0.710143	rs139571	CCDC134	0	intronic	0.603	7
PD-asthma	rs4822053	22	42212936	C	A	0.2276	NA	0.69025	rs139571	CCDC134	0	intronic	0.746	5
PD-asthma	rs139571	22	42214238	G	A	0.1958	NA	0.807115	rs139571	CCDC134	0	intronic	5.241	5
PD-asthma	rs139572	22	42214532	G	A	0.1968	NA	0.801369	rs139571	CCDC134	0	intronic	2.588	6
PD-asthma	rs139573	22	42214785	G	A	0.1968	NA	0.801369	rs139571	CCDC134	0	intronic	0.293	5
PD-asthma	rs4820446	22	42215684	C	T	0.1968	NA	0.801369	rs139571	CCDC134	0	intronic	9.122	5
PD-asthma	rs6002505	22	42216149	A	G	0.2286	NA	0.685909	rs139571	CCDC134	0	intronic	2.644	7
PD-asthma	rs7364123	22	42216326	A	G	0.2286	NA	0.685909	rs139571	CCDC134	0	intronic	1.618	7

## Sheet: Table S7
Table S7. Colocalization results for tests conducted between PD and RD traits in regions +/-500kb lead variants (r2 threshold = 0.1)
Trait	Gene	Chromosome	Start	Stop	p1	p2	p12	nsnps	PP.H0.abf	PP.H1.abf	PP.H2.abf	PP.H3.abf	PP.H4.abf
PD-COPD	SETD1A	16	30968615	30996437	0.0001	0.0001	1e-05	1802	1.13806e-13	6.34972e-07	1.62198e-08	0.0895864	0.910413
PD-COPD	TBKBP1	17	45771447	45789416	0.0001	0.0001	1e-05	4128	1.24851e-41	5.34225e-18	1.48061e-24	0.633174	0.366826
PD-COPD	HLA-DQA1	6	32595956	32614839	0.0001	0.0001	1e-05	10410	2.51395e-79	4.31608e-06	5.82458e-74	0.999996	8.86891e-08
PD-COPD	KLHL29	2	23608088	23931481	0.0001	0.0001	1e-05	5417	0.391861	0.169682	0.254455	0.110109	0.0738929
PD-COPD	C6orf10	6	32256303	32339684	0.0001	0.0001	1e-05	8855	2.31938e-79	4.14569e-06	5.59464e-74	0.999996	8.18249e-08
PD-COPD	HLA-DQB1	6	32627244	32636160	0.0001	0.0001	1e-05	10664	2.63811e-79	4.42138e-06	5.96669e-74	0.999995	9.30695e-08
PD-COPD	SPNS1	16	28985542	28995869	0.0001	0.0001	1e-05	1882	0.030314	0.486941	0.0138299	0.221906	0.247009
PD-COPD	CDC123	10	12237964	12292588	0.0001	0.0001	1e-05	5211	1.32016e-73	0.688074	4.87067e-74	0.253804	0.0581217
PD-COPD	BTNL2	6	32361740	32374905	0.0001	0.0001	1e-05	8746	2.31938e-79	4.14569e-06	5.59464e-74	0.999996	8.1825e-08
PD-COPD	CDH23	10	73156691	73575702	0.0001	0.0001	1e-05	3867	6.81553e-12	0.635719	2.94696e-12	0.274788	0.0894927
PD-COPD	OR11A1	6	29393281	29424848	0.0001	0.0001	1e-05	7829	3.75985e-27	0.694347	1.54554e-27	0.285401	0.0202526
PD-COPD	RAD51B	14	68286496	69196935	0.0001	0.0001	1e-05	6881	7.24709e-06	0.433534	6.90017e-06	0.412627	0.153824
PD-COPD	PANK4	1	2439972	2458039	0.0001	0.0001	1e-05	4278	0.162269	0.570556	0.0516823	0.181686	0.0338064
PD-COPD	SLC29A3	10	73079015	73123142	0.0001	0.0001	1e-05	3044	0.0039998	0.765558	0.00111551	0.213491	0.0158354
PD-IPF	PIGL	17	16120505	16252115	0.0001	0.0001	1e-05	5164	0.000255812	0.000166119	0.394497	0.25583	0.349251
PD-IPF	HLA-DQA1	6	32595956	32614839	0.0001	0.0001	1e-05	12285	2.01514e-07	4.88772e-06	0.0395638	0.95962	0.000811405
PD-IPF	TBKBP1	17	45771447	45789416	0.0001	0.0001	1e-05	5710	7.87371e-23	5.69967e-18	9.3375e-06	0.675604	0.324387
PD-OSA	WIF1	12	65444406	65515346	0.0001	0.0001	1e-05	637	2.23603e-10	0.606794	3.18505e-11	0.0861259	0.30708
PD-OSA	CNTN1	12	41086244	41466220	0.0001	0.0001	1e-05	1862	0.0381164	0.170697	0.143235	0.641444	0.00650776
PD-asthma	HLA-DQA1	6	32595956	32614839	0.0001	0.0001	1e-05	10966	4.10723e-126	7.47928e-121	5.49145e-06	0.999994	2.93664e-07
PD-asthma	PIGL	17	16120505	16252115	0.0001	0.0001	1e-05	4519	7.76419e-09	7.91041e-06	0.000191163	0.193957	0.805844
PD-asthma	SETD1A	16	30968615	30996437	0.0001	0.0001	1e-05	3373	1.30356e-12	1.25045e-07	9.08336e-06	0.871196	0.128795
PD-asthma	RAD51B	14	68286496	69196935	0.0001	0.0001	1e-05	8577	0.140024	0.0896346	0.462718	0.296193	0.0114312
PD-asthma	TAP2	6	32781544	32806599	0.0001	0.0001	1e-05	11183	4.27139e-126	7.62727e-121	5.60013e-06	0.999994	3.05401e-07
PD-asthma	HLA-DQB1	6	32627244	32636160	0.0001	0.0001	1e-05	11243	4.31733e-126	7.66819e-121	5.63015e-06	0.999994	3.08685e-07
PD-asthma	ERMP1	9	5765076	5833117	0.0001	0.0001	1e-05	5682	1.90668e-72	1.10444e-72	0.629219	0.364468	0.00631283

## Sheet: Table S8
Table S8. SMR results for tests conducted between PD and all respiratory disorders traits using eQTL probes in region +/-250kb
trait	Tissue	probeID	ProbeChr	Gene	Probe_bp	topSNP	topSNP_chr	topSNP_bp	A1	A2	Freq	b_GWAS	se_GWAS	p_GWAS	b_eQTL	se_eQTL	p_eQTL	b_SMR	se_SMR	p_SMR	p_HEIDI	nsnp_HEIDI
asthma	Whole_Blood	ENSG00000179344	6	HLA-DQB1	32627244	rs3134993	6	32637778	A	G	0.592445	-0.12518	0.0058205	1.34631e-102	-0.775797	0.0178434	3.66093e-95	0.161357	0.00837032	8.34114e-83	1.48223e-12	20
asthma	Whole_Blood	ENSG00000196735	6	HLA-DQA1	32595956	rs17843580	6	32615551	G	A	0.506958	-0.1184	0.0051862	2.31922e-115	-0.356525	0.0205582	2.25929e-67	0.332095	0.024048	2.22855e-43	0.0845463	20
asthma	Lung	ENSG00000196735	6	HLA-DQA1	32595956	rs17843590	6	32615850	G	A	0.398608	-0.15365	0.0078249	7.6116e-86	-0.658117	0.032908	5.65242e-89	0.233469	0.016663	1.3307e-44	2.61341e-15	20
asthma	Lung	ENSG00000179344	6	HLA-DQB1	32627244	rs9274639	6	32636146	C	T	0.727634	-0.10921	0.0064268	9.26835e-65	-0.885939	0.0402211	1.59668e-107	0.12327	0.00916206	2.8997e-41	0.000119142	20
asthma	Brain_Nucleus_accumbens_basal_ganglia	ENSG00000179344	6	HLA-DQB1	32627244	rs9273397	6	32627109	G	A	0.472167	-0.11886	0.0058919	1.67505e-90	-0.866981	0.0679124	2.53353e-37	0.137096	0.0127087	3.93948e-27	0.101988	20
asthma	Brain_Caudate_basal_ganglia	ENSG00000179344	6	HLA-DQB1	32627244	rs9273404	6	32627160	G	A	0.460239	-0.13173	0.0063653	3.84082e-95	-0.818587	0.062197	1.46737e-39	0.160924	0.0144903	1.17786e-28	0.317222	20
asthma	Brain_Putamen_basal_ganglia	ENSG00000179344	6	HLA-DQB1	32627244	rs9273404	6	32627160	G	A	0.460239	-0.13173	0.0063653	3.84082e-95	-0.93087	0.075428	5.43542e-35	0.141513	0.0133508	2.99353e-26	0.138434	20
asthma	Brain_Cerebellum	ENSG00000179344	6	HLA-DQB1	32627244	rs17843624	6	32620885	T	A	0.397614	-0.12374	0.0060175	5.84463e-94	-0.864208	0.0665552	1.49166e-38	0.143183	0.0130414	4.81454e-28	0.00430946	20
asthma	Brain_Hippocampus	ENSG00000179344	6	HLA-DQB1	32627244	rs9273404	6	32627160	G	A	0.460239	-0.13173	0.0063653	3.84082e-95	-0.801535	0.0682927	8.25904e-32	0.164347	0.0160979	1.80321e-24	0.000228384	20
asthma	Brain_Cerebellar_Hemisphere	ENSG00000179344	6	HLA-DQB1	32627244	rs9273348	6	32623487	G	T	0.430417	-0.11864	0.0066257	1.05814e-71	-0.937747	0.0874874	8.32087e-27	0.126516	0.0137565	3.687e-20	0.0888905	20
asthma	Amygdala	ENSG00000179344	6	HLA-DQB1	32627244	rs17843610	6	32620529	C	T	0.411531	-0.11739	0.005938	5.47489e-87	-0.786581	0.0749005	8.48566e-26	0.149241	0.0160918	1.78715e-20	0.0354579	20
asthma	Brain_Spinal_cord_cervical_c-1	ENSG00000179344	6	HLA-DQB1	32627244	rs9273158	6	32613062	C	G	0.452286	-0.11629	0.005439	2.01779e-101	-0.808563	0.0797751	3.84259e-24	0.143823	0.0157037	5.25876e-20	0.833651	20
asthma	Brain_Hypothalamus	ENSG00000179344	6	HLA-DQB1	32627244	rs9273243	6	32614091	A	G	0.469185	-0.12257	0.0058879	3.01907e-96	-0.784016	0.0742943	4.92838e-26	0.156336	0.0166094	4.84369e-21	0.0321692	20
asthma	Brain_Substantia_nigra	ENSG00000179344	6	HLA-DQB1	32627244	rs9274639	6	32636146	C	T	0.727634	-0.10921	0.0064268	9.26835e-65	-0.986441	0.0987044	1.62096e-23	0.110711	0.0128517	7.02453e-18	0.0132911	20
asthma	Brain_Anterior_cingulate_cortex_BA24	ENSG00000179344	6	HLA-DQB1	32627244	rs1766	6	32627795	G	A	0.425447	-0.062451	0.0058797	2.36827e-26	-0.934005	0.0955158	1.39204e-22	0.0668637	0.00929432	6.29033e-13	0.00427516	20
asthma	Brain_Frontal_Cortex_BA9	ENSG00000179344	6	HLA-DQB1	32627244	rs1766	6	32627795	G	A	0.425447	-0.062451	0.0058797	2.36827e-26	-0.873814	0.0903437	3.96134e-22	0.0714694	0.00999386	8.59367e-13	0.0235536	20
asthma	Whole_Blood	ENSG00000204267	6	TAP2	32789610	rs2857115	6	32778281	A	G	0.308151	0.043541	0.0053674	4.97436e-16	0.284172	0.0258304	3.75962e-28	0.153221	0.0234674	6.6178e-11	3.27648e-05	20
asthma	Brain_Caudate_basal_ganglia	ENSG00000196735	6	HLA-DQA1	32595956	rs17843604	6	32620283	T	C	0.533797	-0.11998	0.0051569	9.81761e-120	-0.410873	0.0533513	1.34719e-14	0.292012	0.0399407	2.64875e-13	0.0392149	20
asthma	Brain_Cortex	ENSG00000179344	6	HLA-DQB1	32627244	rs1766	6	32627795	G	A	0.425447	-0.062451	0.0058797	2.36827e-26	-0.798588	0.0771775	4.29927e-25	0.0782018	0.0105511	1.24673e-13	0.0184223	20
asthma	Brain_Cerebellum	ENSG00000204267	6	TAP2	32789610	rs4148869	6	32806576	T	C	0.4334	-0.043973	0.0049129	3.53818e-19	0.710497	0.0761752	1.08764e-20	-0.0618905	0.00958352	1.06086e-10	0.00279457	20
asthma	Brain_Cortex	ENSG00000196735	6	HLA-DQA1	32595956	rs9271376	6	32587113	A	G	0.767396	-0.10546	0.0064413	3.00749e-60	-0.507356	0.076887	4.14723e-11	0.207862	0.0339626	9.33841e-10	0.0130024	20
asthma	Brain_Frontal_Cortex_BA9	ENSG00000196735	6	HLA-DQA1	32595956	rs9271376	6	32587113	A	G	0.767396	-0.10546	0.0064413	3.00749e-60	-0.517689	0.0825246	3.53816e-10	0.203713	0.0347759	4.68803e-09	0.0295166	20
asthma	Brain_Spinal_cord_cervical_c-1	ENSG00000196735	6	HLA-DQA1	32595956	rs9272957	6	32611152	A	G	0.253479	-0.1302	0.0072543	4.97717e-72	-0.493239	0.0810696	1.17115e-09	0.263969	0.0458115	8.3085e-09	0.192633	20
asthma	Brain_Hippocampus	ENSG00000196735	6	HLA-DQA1	32595956	rs71549254	6	32501887	G	A	0.305169	-0.12105	0.0068771	2.38214e-69	-0.327688	0.0544168	1.72474e-09	0.369406	0.0648353	1.21497e-08	0.00265106	20
asthma	Brain_Putamen_basal_ganglia	ENSG00000196735	6	HLA-DQA1	32595956	rs17843604	6	32620283	T	C	0.533797	-0.11998	0.0051569	9.81761e-120	-0.394366	0.0682079	7.38973e-09	0.304235	0.0542198	2.00987e-08	0.520153	20
asthma	Brain_Cortex	ENSG00000204267	6	TAP2	32789610	rs4148869	6	32806576	T	C	0.4334	-0.043973	0.0049129	3.53818e-19	0.58205	0.0789985	1.73392e-13	-0.0755485	0.013281	1.28193e-08	5.3662e-05	20
asthma	Brain_Cerebellar_Hemisphere	ENSG00000204267	6	TAP2	32789610	rs4148868	6	32806584	A	G	0.465209	-0.04227	0.0048732	4.17303e-18	0.64417	0.0959103	1.86292e-11	-0.0656193	0.0123565	1.0933e-07	0.132146	14
asthma	Brain_Frontal_Cortex_BA9	ENSG00000204267	6	TAP2	32789610	rs2071552	6	32806461	G	A	0.470179	-0.04026	0.005144	5.01264e-15	0.467407	0.0637042	2.18192e-13	-0.0861348	0.0160915	8.65941e-08	0.00414527	20
asthma	Brain_Hypothalamus	ENSG00000204267	6	TAP2	32789610	rs2071544	6	32806121	C	T	0.482107	-0.043768	0.0048507	1.82961e-19	0.364905	0.0593351	7.75328e-10	-0.119944	0.0236027	3.73911e-07	0.314511	12
asthma	Brain_Nucleus_accumbens_basal_ganglia	ENSG00000204267	6	TAP2	32789610	rs9276627	6	32743835	T	C	0.0924453	-0.026443	0.008428	0.00170385	-0.806685	0.10974	1.9691e-13	0.0327798	0.0113596	0.00390596	0.0172587	20
asthma	Lung	ENSG00000204267	6	TAP2	32789610	rs4148876	6	32796793	A	G	0.0735586	-0.022327	0.0092044	0.0152794	-0.502612	0.0510186	6.74934e-23	0.0444219	0.0188601	0.0185057	0.0221091	20
asthma	Brain_Caudate_basal_ganglia	ENSG00000204267	6	TAP2	32789610	rs4148876	6	32796793	A	G	0.0735586	-0.022327	0.0092044	0.0152794	-0.853595	0.119289	8.32615e-13	0.0261564	0.0113858	0.0216027	0.0184179	20
asthma	Brain_Anterior_cingulate_cortex_BA24	ENSG00000204267	6	TAP2	32789610	rs4148876	6	32796793	A	G	0.0735586	-0.022327	0.0092044	0.0152794	-1.01478	0.169671	2.21939e-09	0.0220018	0.00978794	0.0245859	0.00127206	3
asthma	Whole_Blood	ENSG00000099219	9	ERMP1	5765076	rs10815290	9	5841963	A	G	0.139165	-0.014228	0.00745	0.0561591	-0.347673	0.031709	5.66233e-28	0.0409235	0.0217508	0.0599079	0.0211882	20
asthma	Brain_Putamen_basal_ganglia	ENSG00000204267	6	TAP2	32789610	rs2051600	6	32709309	G	A	0.793241	0.0051947	0.0066843	0.437071	0.418196	0.0724004	7.64263e-09	0.0124217	0.0161277	0.441176	0.000142208	20
asthma	Brain_Spinal_cord_cervical_c-1	ENSG00000099219	9	ERMP1	5765076	rs4742119	9	5735913	C	T	0.949304	-0.0011336	0.010037	0.910076	-0.616679	0.104729	3.9005e-09	0.00183823	0.0162789	0.910093	0.697918	5
asthma	Brain_Nucleus_accumbens_basal_ganglia	ENSG00000099219	9	ERMP1	5765076	rs4742119	9	5735913	C	T	0.949304	-0.0011336	0.010037	0.910076	-0.522939	0.0909982	9.10045e-09	0.00216775	0.0191971	0.910094	0.561338	4
asthma	Anterior_cingulate_cortex	ENSG00000204267	6	TAP2	32789610	rs4148876	6	32796793	A	G	0.0735586	-0.057	0.0361	0.114348	-1.01478	0.169671	2.21939e-09	0.0561698	0.036793	0.12685	0.0765235	3
asthma	Caudate_basal_ganglia	ENSG00000204267	6	TAP2	32789610	rs4148876	6	32796793	A	G	0.0735586	-0.057	0.0361	0.114348	-0.853595	0.119289	8.32615e-13	0.0667764	0.0433091	0.123108	0.219017	17
asthma	Cerebellar_Hemisphere	ENSG00000204267	6	TAP2	32789610	rs4148868	6	32806584	A	G	0.465209	0.0163	0.018	0.365171	0.64417	0.0959103	1.86292e-11	0.0253039	0.0281958	0.369487	0.167771	16
asthma	Cerebellum	ENSG00000204267	6	TAP2	32789610	rs4148869	6	32806576	T	C	0.4334	0.0178	0.0181	0.325398	0.710497	0.0761752	1.08764e-20	0.0250529	0.0256163	0.328072	0.100079	20
asthma	Cortex	ENSG00000204267	6	TAP2	32789610	rs2071627	6	32809223	A	C	0.430417	0.0071	0.0183	0.698032	0.605275	0.0766612	2.89251e-15	0.0117302	0.0302707	0.698378	0.327336	20
asthma	Frontal_Cortex_BA9	ENSG00000204267	6	TAP2	32789610	rs2071552	6	32806461	G	A	0.470179	0.0185	0.018	0.304054	0.467407	0.0637042	2.18192e-13	0.0395801	0.0388863	0.308754	0.0594044	20
asthma	Hypothalamus	ENSG00000204267	6	TAP2	32789610	rs2071544	6	32806121	C	T	0.482107	0.0125	0.018	0.487403	0.364905	0.0593351	7.75328e-10	0.0342555	0.0496414	0.490157	0.36594	13
asthma	Nucleus_accumbens_basal_ganglia	ENSG00000204267	6	TAP2	32789610	rs9276627	6	32743835	T	C	0.0924453	-0.057	0.0357	0.110346	-0.806685	0.10974	1.9691e-13	0.0706596	0.0452871	0.118699	0.245224	20
asthma	Nucleus_accumbens_basal_ganglia	ENSG00000099219	9	ERMP1	5765076	rs6476998	9	5737579	G	A	0.94831	0.0339	0.0495	0.493439	-0.522939	0.0909982	9.10045e-09	-0.0648259	0.0953271	0.496481	0.0668444	5
asthma	Putamen_basal_ganglia	ENSG00000204267	6	TAP2	32789610	rs2051600	6	32709309	G	A	0.793241	0.0503	0.0239	0.0353259	0.418196	0.0724004	7.64263e-09	0.120279	0.0608256	0.0479929	0.0759979	20
asthma	Spinal_cord_cervical_c-1	ENSG00000099219	9	ERMP1	5765076	rs6476998	9	5737579	G	A	0.94831	0.0339	0.0495	0.493439	-0.616679	0.104729	3.9005e-09	-0.0549719	0.0808097	0.496338	0.0245209	6
COPD	Blood	ENSG00000179344	6	HLA-DQB1	32627244	rs3134993	6	32637778	A	G	0.592445	0.0227988	0.00215077	2.97037e-26	-0.775797	0.0178434	3.07408e-131	-0.0293876	0.00285354	1.73308e-28	5.37401e-05	20
COPD	lung	ENSG00000179344	6	HLA-DQB1	32627244	rs9274639	6	32636146	C	T	0.727634	0.0186335	0.00236081	2.95382e-15	-0.885939	0.0402211	1.59668e-107	-0.0210325	0.00283067	2.02638e-23	1.61237e-05	20
COPD	Blood	ENSG00000196735	6	HLA-DQA1	32595956	rs17843580	6	32615551	G	A	0.506958	0.0240625	0.0021533	5.42281e-29	-0.356525	0.0205582	2.25929e-67	-0.0674918	0.00718496	1.08138e-22	0.961448	20
COPD	Cortex	ENSG00000179344	6	HLA-DQB1	32627244	rs1766	6	32627795	G	A	0.425447	0.0277823	0.00209428	3.65e-40	-0.798588	0.0771775	4.3e-25	-0.0347893	0.00426395	1.81e-20	0.00395208	20
COPD	lung	ENSG00000196735	6	HLA-DQA1	32595956	rs9272320	6	32604124	A	G	0.497018	0.0231246	0.00213403	2.32114e-27	-0.663853	0.0332235	7.98817e-89	-0.0348339	0.00365689	2.14687e-20	0.0385783	20
COPD	Anterior_cingulate_cortex_BA24	ENSG00000179344	6	HLA-DQB1	32627244	rs1766	6	32627795	G	A	0.425447	0.0277823	0.00209428	3.65e-40	-0.934005	0.0955158	1.39e-22	-0.0297453	0.003779	3.64e-20	0.0370127	20
COPD	Brain_Cortex	ENSG00000179344	6	HLA-DQB1	32627244	rs1766	6	32627795	G	A	0.425447	0.0277823	0.00209428	3.65498e-40	-0.798588	0.0771775	4.29927e-25	-0.0347893	0.00426395	4.08545e-19	0.00395208	20
COPD	Caudate_basal_ganglia	ENSG00000179344	6	HLA-DQB1	32627244	rs9273398	6	32627115	T	G	0.468191	0.023556	0.00214146	3.82e-28	-0.818587	0.062197	1.47e-39	-0.0287764	0.00340944	6.46e-17	0.0175389	20
COPD	Nucleus_accumbens_basal_ganglia	ENSG00000179344	6	HLA-DQB1	32627244	rs9273397	6	32627109	G	A	0.472167	0.0235455	0.00214138	4.02e-28	-0.866981	0.0679124	2.53e-37	-0.027158	0.00325978	1.16e-16	0.0245488	20
COPD	Hippocampus	ENSG00000179344	6	HLA-DQB1	32627244	rs9273398	6	32627115	T	G	0.468191	0.023556	0.00214146	3.82e-28	-0.790515	0.067366	8.47e-32	-0.0297983	0.00371304	1.8e-15	1	20
COPD	Putamen_basal_ganglia	ENSG00000179344	6	HLA-DQB1	32627244	rs9273398	6	32627115	T	G	0.468191	0.023556	0.00214146	3.82e-28	-0.93087	0.075428	5.44e-35	-0.0253054	0.00308168	2.01e-15	0.0239909	20
COPD	Frontal_Cortex	ENSG00000179344	6	HLA-DQB1	32627244	rs1766	6	32627795	G	A	0.425447	0.0277823	0.00209428	3.65e-40	-0.873814	0.0903437	3.96e-22	-0.0317943	0.00406817	6.01e-15	0.00354181	20
COPD	Amygdala	ENSG00000179344	6	HLA-DQB1	32627244	rs17843610	6	32620529	C	T	0.411531	0.0235745	0.00214007	3.21e-28	-0.786581	0.0749005	8.49e-26	-0.0299708	0.00394299	7.34e-15	0.00844075	20
COPD	Spinal_cord_cervical	ENSG00000179344	6	HLA-DQB1	32627244	rs9273158	6	32613062	C	G	0.452286	0.0239518	0.00215078	8.35e-29	-0.808563	0.0797751	3.84e-24	-0.0296227	0.0039519	4.19e-14	0.999997	20
COPD	Hypothalamus	ENSG00000179344	6	HLA-DQB1	32627244	rs9273243	6	32614091	A	G	0.469185	0.0236417	0.0021398	2.23e-28	-0.784016	0.0742943	4.93e-26	-0.0301546	0.00395148	3.26e-12	0.946601	20
COPD	Brain_Substantia_nigra	ENSG00000179344	6	HLA-DQB1	32627244	rs9274639	6	32636146	C	T	0.727634	0.0186335	0.00236081	2.95382e-15	-0.986441	0.0987044	1.62096e-23	-0.0188896	0.00304963	2.62783e-11	0.00150667	20
COPD	Caudate_basal_ganglia	ENSG00000196735	6	HLA-DQA1	32595956	rs12527758	6	32620286	C	T	0.441352	0.0232234	0.00215118	3.61e-27	-0.410873	0.0533513	1.35e-14	-0.0565221	0.0090154	3.62e-10	0.0733767	20
COPD	Blood	ENSG00000151465	10	CDC123	12237964	rs12779647	10	12292286	G	C	0.549702	-0.0324408	0.00211257	3.2248e-53	-0.0959346	0.0165255	6.42726e-09	0.338155	0.0622735	5.63008e-08	0.00885921	3
COPD	Cerebellum	ENSG00000179344	6	HLA-DQB1	32627244	rs17612907	6	32620852	A	G	0.39165	0.0104989	0.0023339	6.85e-06	-0.864208	0.0665552	1.49e-38	-0.0121486	0.0028581	8.8e-08	0.999059	20
COPD	Putamen_basal_ganglia	ENSG00000196735	6	HLA-DQA1	32595956	rs12527758	6	32620286	C	T	0.441352	0.0232234	0.00215118	3.61e-27	-0.394366	0.0682079	7.39e-09	-0.0588879	0.0115538	3.45e-07	0.302145	20
COPD	Brain_Cortex	ENSG00000196735	6	HLA-DQA1	32595956	rs17612852	6	32620572	A	G	0.763419	0.0179606	0.00241689	1.07547e-13	-0.488648	0.0728848	2.02254e-11	-0.0367557	0.00738374	6.42706e-07	0.454804	20
COPD	Cortex	ENSG00000196735	6	HLA-DQA1	32595956	rs17612852	6	32620572	A	G	0.763419	0.0179606	0.00241689	1.08e-13	-0.488648	0.0728848	2.02e-11	-0.0367557	0.00738374	6.43e-07	0.454804	20
COPD	Frontal_Cortex	ENSG00000196735	6	HLA-DQA1	32595956	rs17612852	6	32620572	A	G	0.763419	0.0179606	0.00241689	1.08e-13	-0.47458	0.0735014	1.07e-10	-0.0378453	0.00776473	1.09e-06	0.554802	20
COPD	Cerebellar_Hemisphere	ENSG00000179344	6	HLA-DQB1	32627244	rs9273348	6	32623487	G	T	0.430417	0.00558976	0.00237163	0.0184268	-0.937747	0.0874874	8.32e-27	-0.00596084	0.00258949	1.8e-06	0.999981	20
COPD	Brain_Cortex	ENSG00000204290	6	BTNL2	32361740	rs1967688	6	32340068	T	C	0.479125	0.0154049	0.00210125	2.27926e-13	-0.460322	0.0896276	2.80734e-07	-0.0334655	0.00795577	3.18506e-06	0.381295	9
COPD	Caudate_basal_ganglia	ENSG00000204290	6	BTNL2	32361740	rs4078373	6	32447832	A	G	0.130219	-0.0154904	0.00323211	1.65e-06	0.930255	0.167504	2.8e-08	-0.0166518	0.00458932	0.000285206	0.0144923	20
COPD	lung	ENSG00000169682	16	SPNS1	28985542	rs1641909	16	29151522	G	A	0.534791	-0.0024979	0.00209553	0.233256	-0.229583	0.0268076	1.08912e-17	0.0108802	0.00921554	0.000720559	0.752205	20
COPD	Blood	ENSG00000169682	16	SPNS1	28985542	rs7140	16	28995757	A	C	0.737575	-0.00499639	0.00228348	0.0286653	-0.329797	0.0198394	4.72404e-62	0.0151499	0.00698362	0.00420543	0.000267685	20
COPD	Blood	ENSG00000198933	17	TBKBP1	45771447	rs6503807	17	45772932	C	T	0.577535	-0.0041779	0.00212231	0.0490034	-0.280576	0.0166502	1.02812e-63	0.0148904	0.00761556	0.00920104	0.176922	20
COPD	Hippocampus	ENSG00000196735	6	HLA-DQA1	32595956	rs551468481	6	32518258	G	A	0.312127	-0.00570736	0.00240824	0.0177915	-0.292592	0.0523282	2.25e-08	0.0195062	0.0089395	0.0291077	9.78e-07	20
COPD	Cerebellum	ENSG00000179344	6	HLA-DQB1	32627244	rs17612907	6	32620852	A	G	0.39165	-0.023	0.039	0.555363	-0.864208	0.0665552	1.49166e-38	0.026614	0.0451745	0.0381953	0.0719693	20
COPD	Caudate_basal_ganglia	ENSG00000204290	6	BTNL2	32361740	rs67037615	6	32453163	C	T	0.129225	0.0518	0.0308	0.0926041	0.909469	0.165403	3.83062e-08	0.0569563	0.0354147	0.107776	0.0680267	20
COPD	lung	ENSG00000198933	17	TBKBP1	45771447	rs8078309	17	45774072	C	T	0.576541	-0.00405522	0.00212477	0.0563208	-0.384816	0.0260458	2.13598e-49	0.0105381	0.0055674	0.14004	0.193962	20
COPD	Blood	ENSG00000107736	10	CDH23	73156691	rs9416004	10	73542550	G	T	0.754473	-0.00442958	0.00236396	0.0609585	-0.214021	0.0330132	8.9977e-11	0.0206969	0.0114976	0.163461	0.00268726	4
COPD	Caudate_basal_ganglia	ENSG00000196735	6	HLA-DQA1	32595956	rs12527758	6	32620286	C	T	0.441352	-0.039	0.0284	0.169678	-0.410873	0.0533513	1.34719e-14	0.0949198	0.0702114	0.176402	0.0773165	20
COPD	Putamen_basal_ganglia	ENSG00000196735	6	HLA-DQA1	32595956	rs12527758	6	32620286	C	T	0.441352	-0.039	0.0284	0.169678	-0.394366	0.0682079	7.38973e-09	0.0988929	0.0740177	0.181526	0.104148	20
COPD	Cortex	ENSG00000179344	6	HLA-DQB1	32627244	rs9273368	6	32626475	A	G	0.260437	-0.0477	0.0219	0.0293999	-0.805361	0.0920123	2.08203e-18	0.0592281	0.0280221	0.19071	0.00352199	20
COPD	Brain_Substantia_nigra	ENSG00000198246	10	SLC29A3	73079015	rs10823727	10	73140291	T	G	0.55169	-0.00278755	0.00216238	0.197359	0.395663	0.086662	4.98095e-06	-0.00704526	0.00567888	0.214751	NA	NA
COPD	Caudate_basal_ganglia	ENSG00000179344	6	HLA-DQB1	32627244	rs9273404	6	32627160	G	A	0.460239	0.0059	0.0403	0.883604	-0.818587	0.062197	1.46737e-39	-0.00720754	0.0492342	0.238561	0.18212	20
COPD	Nucleus_accumbens_basal_ganglia	ENSG00000179344	6	HLA-DQB1	32627244	rs9273404	6	32627160	G	A	0.460239	0.0059	0.0403	0.883604	-0.865745	0.068344	8.95715e-37	-0.00681494	0.0465526	0.266203	0.167739	20
COPD	Cortex	ENSG00000119771	2	KLHL29	23608088	rs13033444	2	23611438	G	A	0.255467	0.0246	0.0251	0.327047	0.218641	0.0369509	3.27732e-09	0.112513	0.116364	0.333591	0.377432	3
COPD	Cortex	ENSG00000196735	6	HLA-DQA1	32595956	rs17612852	6	32620572	A	G	0.763419	0.0232	0.0244	0.341696	-0.488648	0.0728848	2.02254e-11	-0.0474779	0.0504334	0.3465	0.0599427	20
COPD	Frontal_Cortex	ENSG00000196735	6	HLA-DQA1	32595956	rs17612852	6	32620572	A	G	0.763419	0.0232	0.0244	0.341696	-0.47458	0.0735014	1.06979e-10	-0.0488853	0.0519684	0.346871	0.0145224	20
COPD	Putamen_basal_ganglia	ENSG00000107736	10	CDH23	73156691	rs58252220	10	73437035	T	C	0.0109344	0.0131561	0.0305466	0.666694	2.0255	0.311278	7.66e-11	0.00649524	0.015114	0.401125	0.433137	3
COPD	Hypothalamus	ENSG00000204290	6	BTNL2	32361740	rs9469094	6	32223191	C	G	0.0308151	0.00518914	0.00699679	0.458302	-1.40825	0.248245	1.4e-08	-0.00368481	0.00501071	0.462103	NA	NA
COPD	Spinal_cord_cervical	ENSG00000196735	6	HLA-DQA1	32595956	rs9273079	6	32612326	T	C	0.187873	-0.0363	0.0505	0.472257	-0.492165	0.0836366	3.99108e-09	0.0737558	0.103371	0.475531	0.0710945	20
COPD	Spinal_cord_cervical	ENSG00000179344	6	HLA-DQB1	32627244	rs9273083	6	32612343	C	T	0.428429	0.0222	0.0392	0.571172	-0.808563	0.0797751	3.84259e-24	-0.0274561	0.0485567	0.571771	0.0152054	20
COPD	Amygdala	ENSG00000179344	6	HLA-DQB1	32627244	rs17843614	6	32620661	G	T	0.442346	-0.0164	0.0296	0.579542	-0.754517	0.0720546	1.16817e-25	0.0217358	0.0392853	0.580072	0.293336	20
COPD	Hypothalamus	ENSG00000179344	6	HLA-DQB1	32627244	rs9273348	6	32623487	G	T	0.430417	-0.0209	0.0398	0.599496	-0.803428	0.0764509	7.84619e-26	0.0260135	0.0495995	0.599951	0.142666	20
COPD	lung	ENSG00000119771	2	KLHL29	23608088	rs113286812	2	23609045	A	G	0.315109	0.0011351	0.00220794	0.607183	-0.25174	0.0410635	8.75981e-10	-0.00450902	0.0088015	0.60844	0.400832	11
COPD	Spinal_cord_cervical	ENSG00000196735	6	HLA-DQA1	32595956	rs9272957	6	32611152	A	G	0.253479	-0.00100333	0.00222256	0.65168	-0.493239	0.0810696	1.17e-09	0.00203417	0.00451844	0.652572	2.99e-06	20
COPD	lung	ENSG00000107736	10	CDH23	73156691	rs10740377	10	73181509	C	G	0.309145	0.00180539	0.00235065	0.442464	-0.263354	0.0439546	2.07918e-09	-0.00685537	0.00899885	0.677061	0.382091	7
COPD	Hippocampus	ENSG00000196735	6	HLA-DQA1	32595956	rs111797109	6	32511650	T	C	0.331014	-0.0386	0.1377	0.779232	-0.294986	0.0525747	2.01397e-08	0.130854	0.467384	0.7795	0.61252	20
COPD	Frontal_Cortex	ENSG00000179344	6	HLA-DQB1	32627244	rs7745002	6	32615421	G	A	0.385686	-0.0166	0.0317	0.600515	-0.790738	0.0896396	1.13137e-18	0.020993	0.0401597	0.811585	0.185546	20
COPD	Brain_Cortex	ENSG00000119771	2	KLHL29	23608088	rs13033444	2	23611438	G	A	0.255467	-0.000548078	0.00231594	0.812925	0.218641	0.0369509	3.27732e-09	-0.00250675	0.0106009	0.813071	0.610025	3
COPD	Cortex	ENSG00000119771	2	KLHL29	23608088	rs13033444	2	23611438	G	A	0.255467	-0.000548078	0.00231594	0.812925	0.218641	0.0369509	3.28e-09	-0.00250675	0.0106009	0.813071	0.610025	3
COPD	Putamen_basal_ganglia	ENSG00000107736	10	CDH23	73156691	rs58252220	10	73437035	T	C	0.0109344	-0.0455	0.2425	0.851168	2.0255	0.311278	7.66419e-11	-0.0224636	0.119773	0.815785	0.969567	3
COPD	Cerebellum	ENSG00000198246	10	SLC29A3	73079015	rs79458134	10	73073361	G	C	0.055666	-0.000931097	0.00459079	0.839277	0.790747	0.144986	4.93e-08	-0.00117749	0.00580965	0.839386	NA	NA
COPD	Cerebellum	ENSG00000198246	10	SLC29A3	73079015	rs79458134	10	73073361	G	C	0.055666	0.0082	0.0419	0.844842	0.790747	0.144986	4.92662e-08	0.0103699	0.053022	0.84494	NA	NA
COPD	Cerebellar_Hemisphere	ENSG00000179344	6	HLA-DQB1	32627244	rs9273348	6	32623487	G	T	0.430417	-0.0209	0.0398	0.599496	-0.937747	0.0874874	8.32087e-27	0.0222875	0.0424931	0.853569	0.0693425	20
COPD	Putamen_basal_ganglia	ENSG00000179344	6	HLA-DQB1	32627244	rs9273404	6	32627160	G	A	0.460239	0.0059	0.0403	0.883604	-0.93087	0.075428	5.43542e-35	-0.00633816	0.0432959	0.883612	0.164707	20
COPD	Hippocampus	ENSG00000179344	6	HLA-DQB1	32627244	rs9273404	6	32627160	G	A	0.460239	0.0059	0.0403	0.883604	-0.801535	0.0682927	8.25904e-32	-0.00736088	0.0502824	0.883613	0.187845	20
COPD	Anterior_cingulate_cortex	ENSG00000179344	6	HLA-DQB1	32627244	rs7745002	6	32615421	G	A	0.385686	-0.0166	0.0317	0.600515	-0.81293	0.0943643	7.00611e-18	0.02042	0.0390667	0.887013	0.101347	20
COPD	Hypothalamus	ENSG00000204290	6	BTNL2	32361740	rs9469094	6	32223191	C	G	0.0308151	-0.0046	0.0498	0.926404	-1.40825	0.248245	1.40454e-08	0.00326647	0.0353677	0.926414	NA	NA
IPF	lung	ENSG00000196735	6	HLA-DQA1	32595956	rs9272320	6	32604124	A	G	0.497018	0.016591	0.026928	0.537812	-0.663853	0.0332235	7.98817e-89	-0.024992	0.0405825	0.0056798	0.557847	20
IPF	Blood	ENSG00000196735	6	HLA-DQA1	32595956	rs17843580	6	32615551	G	A	0.506958	0.031553	0.022383	0.158632	-0.356525	0.0205582	2.25929e-67	-0.0885015	0.0629881	0.00611492	0.145899	20
IPF	Brain_Cortex	ENSG00000196735	6	HLA-DQA1	32595956	rs17612852	6	32620572	A	G	0.763419	0.046479	0.024954	0.0625204	-0.488648	0.0728848	2.02254e-11	-0.0951175	0.0530015	0.0727145	0.69391	20
IPF	Cortex	ENSG00000196735	6	HLA-DQA1	32595956	rs17612852	6	32620572	A	G	0.763419	0.046479	0.024954	0.0625204	-0.488648	0.0728848	2.02254e-11	-0.0951175	0.0530015	0.0727145	0.69391	20
IPF	Frontal_Cortex	ENSG00000196735	6	HLA-DQA1	32595956	rs17612852	6	32620572	A	G	0.763419	0.046479	0.024954	0.0625204	-0.47458	0.0735014	1.06979e-10	-0.0979371	0.0547253	0.0735162	0.681565	20
IPF	Blood	ENSG00000198933	17	TBKBP1	45771447	rs6503807	17	45772932	C	T	0.577535	-0.022528	0.018941	0.234291	-0.280576	0.0166502	1.02812e-63	0.080292	0.0676755	0.0826077	0.448931	20
IPF	Caudate_basal_ganglia	ENSG00000196735	6	HLA-DQA1	32595956	rs12527758	6	32620286	C	T	0.441352	0.035613	0.020942	0.0890268	-0.410873	0.0533513	1.34719e-14	-0.0866764	0.0521973	0.0968034	0.3654	20
IPF	Putamen_basal_ganglia	ENSG00000196735	6	HLA-DQA1	32595956	rs12527758	6	32620286	C	T	0.441352	0.035613	0.020942	0.0890268	-0.394366	0.0682079	7.38973e-09	-0.0903044	0.0553522	0.102795	0.526115	20
IPF	Caudate_basal_ganglia	ENSG00000196735	6	HLA-DQA1	32595956	rs12527758	6	32620286	C	T	0.441352	-0.039	0.0284	0.169678	-0.410873	0.0533513	1.35e-14	0.0949198	0.0702114	0.176402	0.0773165	20
IPF	Putamen_basal_ganglia	ENSG00000196735	6	HLA-DQA1	32595956	rs12527758	6	32620286	C	T	0.441352	-0.039	0.0284	0.169678	-0.394366	0.0682079	7.39e-09	0.0988929	0.0740177	0.181526	0.104148	20
IPF	lung	ENSG00000198933	17	TBKBP1	45771447	rs8078309	17	45774072	C	T	0.576541	-0.022803	0.018943	0.228679	-0.384816	0.0260458	2.13598e-49	0.0592569	0.0493892	0.193821	0.120469	20
IPF	Cortex	ENSG00000196735	6	HLA-DQA1	32595956	rs17612852	6	32620572	A	G	0.763419	0.0232	0.0244	0.341696	-0.488648	0.0728848	2.02e-11	-0.0474779	0.0504334	0.3465	0.0599427	20
IPF	Frontal_Cortex	ENSG00000196735	6	HLA-DQA1	32595956	rs17612852	6	32620572	A	G	0.763419	0.0232	0.0244	0.341696	-0.47458	0.0735014	1.07e-10	-0.0488853	0.0519684	0.346871	0.0145224	20
IPF	Spinal_cord_cervical	ENSG00000196735	6	HLA-DQA1	32595956	rs9273079	6	32612326	T	C	0.187873	-0.0363	0.0505	0.472257	-0.492165	0.0836366	3.99e-09	0.0737558	0.103371	0.475531	0.0710945	20
IPF	Hippocampus	ENSG00000196735	6	HLA-DQA1	32595956	rs111797109	6	32511650	T	C	0.331014	-0.0386	0.1377	0.779232	-0.294986	0.0525747	2.01e-08	0.130854	0.467384	0.7795	0.61252	20
IPF	Spinal_cord_cervical	ENSG00000196735	6	HLA-DQA1	32595956	rs9272957	6	32611152	A	G	0.253479	-0.0047863	0.039446	0.903423	-0.493239	0.0810696	1.17115e-09	0.00970382	0.0799893	0.903442	0.116516	20
IPF	Hippocampus	ENSG00000196735	6	HLA-DQA1	32595956	rs9272370	6	32604644	A	G	0.33996	0.0018417	0.041027	0.964195	-0.294683	0.0518847	1.3503e-08	-0.00624977	0.139229	0.964196	0.132767	20
OSA	Cerebellum	ENSG00000018236	12	CNTN1	41086244	rs77325461	12	41297476	G	A	0.125249	-0.000290348	0.0051917	0.955401	-0.438864	0.046915	8.40354e-21	0.000661591	0.0118301	0.533389	0.193603	20
OSA	Cerebellum	ENSG00000018236	12	CNTN1	41086244	rs77325461	12	41297476	G	A	0.125249	0.0171	0.0324	0.597654	-0.438864	0.046915	8.40354e-21	-0.0389642	0.0739444	0.598235	0.792855	20
OSA	Cerebellar_Hemisphere	ENSG00000018236	12	CNTN1	41086244	rs77325461	12	41297476	G	A	0.125249	0.0171	0.0324	0.597654	-0.452989	0.0503424	2.29522e-19	-0.0377493	0.0716478	0.598282	0.330833	17
OSA	Lung	ENSG00000156076	12	WIF1	65444406	rs7307574	12	65394677	T	C	0.208748	0.00091748	0.00427976	0.830253	0.279701	0.0373198	6.64449e-14	0.00328022	0.0153075	0.830322	0.0341085	4
OSA	Cerebellar_Hemisphere	ENSG00000018236	12	CNTN1	41086244	rs77325461	12	41297476	G	A	0.125249	-0.000290348	0.0051917	0.955401	-0.452989	0.0503424	2.29522e-19	0.000640961	0.0114612	0.955402	0.70069	14
PD	Blood	ENSG00000169682	16	SPNS1	28985542	rs7140	16	28995757	A	C	0.737575	0.0742	0.0188	7.91999e-05	-0.329797	0.0198394	4.72404e-62	-0.224987	0.0585894	0.000535937	0.876897	20
PD	Blood	ENSG00000196735	6	HLA-DQA1	32595956	rs17843580	6	32615551	G	A	0.506958	-0.027	0.0237	0.254603	-0.356525	0.0205582	2.25929e-67	0.075731	0.0666183	0.00425113	0.183759	20
PD	Brain_Cortex	ENSG00000179344	6	HLA-DQB1	32627244	rs9273368	6	32626475	A	G	0.260437	-0.0477	0.0219	0.0293999	-0.805361	0.0920123	2.08203e-18	0.0592281	0.0280221	0.00889858	0.00352199	20
PD	Blood	ENSG00000179344	6	HLA-DQB1	32627244	rs17843580	6	32615551	G	A	0.506958	-0.027	0.0237	0.254603	-0.774316	0.0179784	3.95463e-24	0.0348695	0.0306184	0.0194671	0.206997	20
PD	lung	ENSG00000169682	16	SPNS1	28985542	rs1641909	16	29151522	G	A	0.534791	-0.0104	0.0197	0.597556	-0.229583	0.0268076	1.09e-17	0.0452995	0.0859706	0.0261937	0.452751	20
PD	Blood	ENSG00000151465	10	CDC123	12237964	rs12779647	10	12292286	G	C	0.549702	0.0408	0.0186	0.0282679	-0.0959346	0.0165255	6.42726e-09	-0.42529	0.207261	0.0401745	0.923232	3
PD	lung	ENSG00000107736	10	CDH23	73156691	rs10740377	10	73181509	C	G	0.309145	0.0218	0.0201	0.278109	-0.263354	0.0439546	2.08e-09	-0.0827783	0.0775635	0.0469213	0.808034	7
PD	lung	ENSG00000179344	6	HLA-DQB1	32627244	rs9273083	6	32612343	C	T	0.428429	0.0222	0.0392	0.571172	-0.762828	0.0368481	3.33e-95	-0.0291022	0.051407	0.0759699	0.0100415	20
PD	lung	ENSG00000196735	6	HLA-DQA1	32595956	rs12527758	6	32620286	C	T	0.441352	-0.039	0.0284	0.169678	-0.662195	0.0331412	8.05e-89	0.058895	0.0429888	0.0881823	0.0642389	20
PD	Brain_Cortex	ENSG00000204290	6	BTNL2	32361740	rs1967688	6	32340068	T	C	0.479125	-0.0085	0.0195	0.662911	-0.460322	0.0896276	2.80734e-07	0.0184653	0.0425139	0.126639	0.268081	6
PD	Blood	ENSG00000198933	17	TBKBP1	45771447	rs6503807	17	45772932	C	T	0.577535	-0.0186	0.0175	0.287847	-0.280576	0.0166502	1.02812e-63	0.0662922	0.0624956	0.262071	0.608883	20
PD	Brain_Cortex	ENSG00000119771	2	KLHL29	23608088	rs13033444	2	23611438	G	A	0.255467	0.0246	0.0251	0.327047	0.218641	0.0369509	3.27732e-09	0.112513	0.116364	0.333591	0.377432	3
PD	lung	ENSG00000198933	17	TBKBP1	45771447	rs8078309	17	45774072	C	T	0.576541	-0.0186	0.0175	0.287847	-0.384816	0.0260458	2.14e-49	0.0483348	0.0455938	0.338191	0.485866	20
PD	Brain_Cortex	ENSG00000196735	6	HLA-DQA1	32595956	rs17612852	6	32620572	A	G	0.763419	0.0232	0.0244	0.341696	-0.488648	0.0728848	2.02254e-11	-0.0474779	0.0504334	0.3465	0.0599427	20
PD	Blood	ENSG00000107736	10	CDH23	73156691	rs9416004	10	73542550	G	T	0.754473	0.0033	0.0199	0.868291	-0.214021	0.0330132	8.9977e-11	-0.015419	0.0930119	0.436028	0.136566	4
PD	lung	ENSG00000119771	2	KLHL29	23608088	rs113286812	2	23609045	A	G	0.315109	0.0167	0.0231	0.469714	-0.25174	0.0410635	8.76e-10	-0.0663383	0.0923972	0.472776	0.687406	11
PD	Brain_Substantia_nigra	ENSG00000179344	6	HLA-DQB1	32627244	rs9273348	6	32623487	G	T	0.430417	-0.0209	0.0398	0.599496	-0.856592	0.0920192	1.29e-20	0.024399	0.0465371	0.870512	0.170777	20
PD	Brain_Substantia_nigra	ENSG00000198246	10	SLC29A3	73079015	rs10762440	10	73144628	T	C	0.550696	-0.0034	0.0219	0.876623	0.395663	0.086662	4.98e-06	-0.00859317	0.0553821	0.876694	NA	NA

## Sheet: Table S9
Table S9. MAGMA-prioritized genes expression associated with Parkinson`s diesase and RD
Trait	GEO datasets	Cell Type	Gene	P.Value	P.Value.adj	Mean log2FC	PCT.1	PCT.2
COPD	GSE249584	T cell	CDC123	0.698249	1	-0.348534086496264	0.159	0.169
COPD	GSE249584	Plasma cell	CDC123	0.335846	1	-0.60192	0.362	0.397
COPD	GSE249584	Plasma cell	CDH23	0.0205337	1	1.37548	0.158	0.092
COPD	GSE249584	NK cell	HLA-DQA1	4.09545e-39	9.26882e-35	-0.706299	0.134	0.197
COPD	GSE249584	B cell	HLA-DQA1	9.75572e-20	1.75e-15	0.466494	0.819	0.766
COPD	GSE249584	Plasma cell	HLA-DQA1	0.0366774	1	0.867081	0.52	0.473
COPD	GSE249584	NK cell	HLA-DQB1	1.09746e-28	2.48378e-24	-0.314503	0.174	0.236
COPD	GSE249584	T cell	HLA-DQB1	1.45898e-09	3.30197e-05	-0.556801	0.08	0.133
COPD	GSE249584	Monocyte	HLA-DQB1	2.60423e-42	5.89389e-38	-0.357673	0.625	0.715
COPD	GSE249584	Megakaryocyte	HLA-DQB1	0.0782683	1	-0.640386	0.239	0.288
COPD	GSE249584	Plasma cell	SLC29A3	0.00426473	1	1.89324	0.109	0.042
COPD	GSE249584	Plasma cell	SPNS1	0.0292699	1	-1.1033	0.172	0.248
IPF	GSE233844	Monocyte	HLA-DQA1	2.74e-42	5.72e-38	-0.843216	0.292	0.445
IPF	GSE233844	Macrophage	HLA-DQA1	1.28e-09	2.67e-05	0.503171	0.58	0.487
IPF	GSE233844	T cell	HLA-DQA1	0.000535667	1	0.588214	0.114	0.084
IPF	GSE233844	T cell	PIGC	0.00461007	1	0.263146	0.238	0.205
IPF	GSE233844	Dendritic cell	PIGC	0.20971	1	-0.347973	0.284	0.348
PD	GSE223138	Plasma cell	CDC123	0.831427	1	-0.270621816	0.513	0.547
PD	GSE223138	Dendritic cell	CDH23	0.408136	1	0.499281015	0.145	0.107
PD	GSE223138	Monocyte	HLA-DQA1	0.0583135	1	0.349682552	0.335	0.329
PD	GSE223138	Plasma cell	HLA-DQA1	0.054236	1	0.664635339	0.445	0.362
PD	GSE223138	B cell	HLA-DQA1	3.56e-84	9.3637e-80	0.880362408	0.945	0.75
PD	GSE223138	T cell	HLA-DQB1	8.26e-18	2.17124e-13	-0.587689503	0.094	0.132
PD	GSE223138	B cell	HLA-DQB1	1.38e-41	3.63995e-37	0.561554924	0.92	0.771
PD	GSE223138	Dendritic cell	HLA-DQB1	0.00292185	1	0.39520322	0.831	0.68
PD	GSE223138	Plasma cell	PIGC	0.666803	1	-0.459050446	0.18	0.19
PD	GSE223138	Dendritic cell	RAD51B	0.0085754	1	-0.843519033	0.277	0.413
PD	GSE223138	Dendritic cell	SETD1A	0.413252	1	0.291984431	0.133	0.097
PD	GSE243639	Oligodendrocyte	CDC123	0.645916	1	-0.300441523	0.107	0.11
PD	GSE243639	Endothelial cell	CDC123	0.448946	1	-0.345279	0.099	0.11
PD	GSE243639	Astrocytes	CDC123	0.016725	1	-0.318313596	0.102	0.139
PD	GSE243639	T cell	CDC123	0.046523	1	-0.884194	0.064	0.164
PD	GSE243639	Microglia	CDH23	4.72e-13	1.33e-08	-0.344971	0.139	0.22
PD	GSE243639	Neural progenitor cell	CDH23	3.5e-05	0.988149	0.336045	0.555	0.518
PD	GSE243639	Astrocyte	CDH23	0.0142553	1	-0.355652	0.124	0.16
PD	GSE243639	Microglia	HLA-DQA1	6.8e-34	1.92e-29	-1.3134	0.077	0.201
PD	GSE243639	Microglia	HLA-DQB1	1.41e-15	3.98e-11	-0.267461	0.15	0.242
PD	GSE243639	Endothelial cell	KLHL29	0.000403402	1	-1.1132	0.108	0.175
PD	GSE243639	Astrocytes	PIGC	0.0124879	1	-0.28963895	0.192	0.239
PD	GSE243639	Oligodendrocyte	RAD51B	6.43e-48	1.81e-43	-0.509756	0.358	0.515
PD	GSE243639	Glial cell	RAD51B	1.15e-06	0.0324417	-0.291345	0.051	0.118
PD	GSE243639	Microglia	RAD51B	1.47e-47	4.14e-43	-0.431243	0.478	0.739
PD	GSE243639	Endothelial cell	RAD51B	7.89e-06	0.222691	-0.50189	0.172	0.284
PD	GSE243639	Astrocyte	RAD51B	5.54e-15	1.56e-10	-0.561417	0.228	0.404
PD	GSE243639	T cell	RAD51B	0.0190068	1	-0.667052	0.244	0.427

[truncated: 3 more sheets: Table S10, Table S11, Table S12]
